# Supplementary material for: FOOTPRINTS study protocol: rationale and methodology of a 3-year longitudinal observational study to phenotype patients with COPD
Source: PubMed Central journal article supplement — BMJ Open. 2021 Mar 22;11(3):e042526. doi: 10.1136/bmjopen-2020-042526 (PMC7986686; doi:10.1136/bmjopen-2020-042526), 2021-03-22
Supplement: bmjopen-2020-042526.draft_revisions.pdf [file bmjopen-2020-042526.draft_revisions.pdf]

# BMJ Open

BMJ Open is committed to open peer review. As part of this commitment we make the peer review history of every article we publish publicly available.

When an article is published we post the peer reviewers' comments and the authors' responses online. We also post the versions of the paper that were used during peer review. These are the versions that the peer review comments apply to.

The versions of the paper that follow are the versions that were submitted during the peer review process. They are not the versions of record or the final published versions. They should not be cited or distributed as the published version of this manuscript.

BMJ Open is an open access journal and the full, final, typeset and author-corrected version of record of the manuscript is available on our site with no access controls, subscription charges or pay-per-view fees (<http://bmjopen.bmj.com>).

If you have any questions on BMJ Open's open peer review process please email [info.bmjopen@bmj.com](mailto:info.bmjopen@bmj.com)

# BMJ Open

## FOOTPRINTS® study: rationale and methodology of a 3-year longitudinal observational study to phenotype patients with COPD

|                               |                                                                                                                                                                                                                                                                                                                                                                                                                                                                                                                                                                                                                                                                                                                                                                                                                                                                                                                                                                                                                                                                                                                                                                                                                                                                                                                                                                                                                                                                                                                                                                       |
|-------------------------------|-----------------------------------------------------------------------------------------------------------------------------------------------------------------------------------------------------------------------------------------------------------------------------------------------------------------------------------------------------------------------------------------------------------------------------------------------------------------------------------------------------------------------------------------------------------------------------------------------------------------------------------------------------------------------------------------------------------------------------------------------------------------------------------------------------------------------------------------------------------------------------------------------------------------------------------------------------------------------------------------------------------------------------------------------------------------------------------------------------------------------------------------------------------------------------------------------------------------------------------------------------------------------------------------------------------------------------------------------------------------------------------------------------------------------------------------------------------------------------------------------------------------------------------------------------------------------|
| Journal:                      | <i>BMJ Open</i>                                                                                                                                                                                                                                                                                                                                                                                                                                                                                                                                                                                                                                                                                                                                                                                                                                                                                                                                                                                                                                                                                                                                                                                                                                                                                                                                                                                                                                                                                                                                                       |
| Manuscript ID                 | bmjopen-2020-042526                                                                                                                                                                                                                                                                                                                                                                                                                                                                                                                                                                                                                                                                                                                                                                                                                                                                                                                                                                                                                                                                                                                                                                                                                                                                                                                                                                                                                                                                                                                                                   |
| Article Type:                 | Protocol                                                                                                                                                                                                                                                                                                                                                                                                                                                                                                                                                                                                                                                                                                                                                                                                                                                                                                                                                                                                                                                                                                                                                                                                                                                                                                                                                                                                                                                                                                                                                              |
| Date Submitted by the Author: | 09-Jul-2020                                                                                                                                                                                                                                                                                                                                                                                                                                                                                                                                                                                                                                                                                                                                                                                                                                                                                                                                                                                                                                                                                                                                                                                                                                                                                                                                                                                                                                                                                                                                                           |
| Complete List of Authors:     | <p>Crapo, James; National Jewish Health, Gupta, Abhya; Boehringer Ingelheim International GmbH, TA Inflammation Med</p> <p>Lynch, David; National Jewish Health, Department of Radiology</p> <p>Vogel-Claussen, Jens; Hannover Medical School, Diagnostic and Interventional Radiology; Hannover (BREATH), German Center for Lung Research (DZL), Biomedical research in endstage and obstructive lung disease</p> <p>Watz, Henrik; Pulmonary Research Institute at LungClinic Grosshansdorf; Airway Research Center North (ARCN), German Center for Lung Research (DZL)</p> <p>Turner, Alice; University of Birmingham, Institute of Applied Health Research</p> <p>Mroz, Robert; Medical University of Bialystok, 2nd Department of Lung Diseases and Tuberculosis</p> <p>Janssens, Wim; University Hospital Leuven, Laboratory of Respiratory Diseases and Thoracic surgery, Department of Respiratory Medicine</p> <p>Ludwig-Sengpiel, Andrea; KLB Gesundheitsforschung Lübeck GmbH</p> <p>Beck, Markus; Boehringer Ingelheim Pharma GmbH and Co KG Biberach, Clinical Research</p> <p>Langellier, Bérengère; Boehringer Ingelheim France SAS, Medical Affairs</p> <p>Ittrich, Carina; Boehringer Ingelheim Pharma GmbH and Co KG Biberach, Global Department of Biostatistics and Data Sciences</p> <p>Risse, Frank; Boehringer Ingelheim Pharma GmbH and Co KG Biberach, Translational Medicine and Clinical Pharmacology</p> <p>Diefenbach, Claudia; Boehringer Ingelheim Pharma GmbH and Co KG Biberach, Translational Medicine and Clinical Pharmacology</p> |
| Keywords:                     | <p>Protocols &amp; guidelines &lt; HEALTH SERVICES ADMINISTRATION &amp; MANAGEMENT, Chronic airways disease &lt; THORACIC MEDICINE, Emphysema &lt; THORACIC MEDICINE, Computed tomography &lt; RADIOLOGY &amp; IMAGING</p>                                                                                                                                                                                                                                                                                                                                                                                                                                                                                                                                                                                                                                                                                                                                                                                                                                                                                                                                                                                                                                                                                                                                                                                                                                                                                                                                            |
|                               |                                                                                                                                                                                                                                                                                                                                                                                                                                                                                                                                                                                                                                                                                                                                                                                                                                                                                                                                                                                                                                                                                                                                                                                                                                                                                                                                                                                                                                                                                                                                                                       |

1  
2  
3  
4  
5  
6  
7  
8  
9  
10  
11  
12  
13  
14  
15  
16  
17  
18  
19  
20  
21  
22  
23  
24  
25  
26  
27  
28  
29  
30  
31  
32  
33  
34  
35  
36  
37  
38  
39  
40  
41  
42  
43  
44  
45  
46  
47  
48  
49  
50  
51  
52  
53  
54  
55  
56  
57  
58  
59  
60

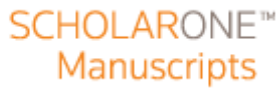

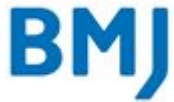

I, the Submitting Author has the right to grant and does grant on behalf of all authors of the Work (as defined in the below author licence), an exclusive licence and/or a non-exclusive licence for contributions from authors who are: i) UK Crown employees; ii) where BMJ has agreed a CC-BY licence shall apply, and/or iii) in accordance with the terms applicable for US Federal Government officers or employees acting as part of their official duties; on a worldwide, perpetual, irrevocable, royalty-free basis to BMJ Publishing Group Ltd ("BMJ") its licensees and where the relevant Journal is co-owned by BMJ to the co-owners of the Journal, to publish the Work in this journal and any other BMJ products and to exploit all rights, as set out in our [licence](#).

The Submitting Author accepts and understands that any supply made under these terms is made by BMJ to the Submitting Author unless you are acting as an employee on behalf of your employer or a postgraduate student of an affiliated institution which is paying any applicable article publishing charge ("APC") for Open Access articles. Where the Submitting Author wishes to make the Work available on an Open Access basis (and intends to pay the relevant APC), the terms of reuse of such Open Access shall be governed by a Creative Commons licence – details of these licences and which [Creative Commons](#) licence will apply to this Work are set out in our licence referred to above.

Other than as permitted in any relevant BMJ Author's Self Archiving Policies, I confirm this Work has not been accepted for publication elsewhere, is not being considered for publication elsewhere and does not duplicate material already published. I confirm all authors consent to publication of this Work and authorise the granting of this licence.

1  
2  
3 **FOOTPRINTS® study: rationale and methodology of a 3-year longitudinal**  
4 **observational study to phenotype patients with COPD**  
5  
6  
7

8 James Crapo,<sup>1</sup> Abhya Gupta,<sup>2</sup> David A. Lynch,<sup>3</sup> Jens Vogel-Claussen,<sup>4,5</sup> Henrik  
9 Watz,<sup>6,7</sup> Alice M. Turner,<sup>8</sup> Robert M. Mroz,<sup>9</sup> Wim Janssens,<sup>10</sup> Andrea Ludwig-  
10 Sengpiel,<sup>11</sup> Markus Beck,<sup>12</sup> Bérengère Langellier,<sup>13</sup> Carina Ittrich,<sup>14</sup> Frank Risse,<sup>15</sup>  
11  
12  
13  
14  
15 Claudia Diefenbach<sup>15</sup>  
16

17  
18 <sup>1</sup>Department of Medicine, National Jewish Health, Denver, Colorado, United States;  
19

20  
21 <sup>2</sup>TA Inflammation Med, Boehringer Ingelheim International GmbH, Biberach an der  
22  
23 Riss, Germany;  
24

25  
26 <sup>3</sup>Department of Radiology, National Jewish Health, Denver, Colorado, United States;  
27

28  
29 <sup>4</sup>Diagnostic and Interventional Radiology, Hannover Medical School, Hannover,  
30  
31 Germany;  
32

33  
34 <sup>5</sup>Biomedical research in endstage and obstructive lung disease Hannover  
35  
36 (BREATH), German Center for Lung Research (DZL), Hannover, Germany;  
37

38  
39 <sup>6</sup>Pulmonary Research Institute at LungClinic Grosshansdorf, Grosshansdorf,  
40  
41 Germany;  
42

43  
44 <sup>7</sup>Airway Research Center North (ARCN), German Center for Lung Research (DZL),  
45  
46 Grosshansdorf, Germany;  
47

48  
49 <sup>8</sup>Institute of Applied Health Research, University of Birmingham, Birmingham, UK;  
50

51  
52 <sup>9</sup>2<sup>nd</sup> Department of Lung Diseases and Tuberculosis, Bialystok Medical University,  
53  
54 Bialystok, Poland;  
55  
56  
57  
58  
59  
60

1  
2  
3 <sup>10</sup>Laboratory of Respiratory Diseases and Thoracic surgery, Department of  
4  
5 Respiratory Medicine, University Hospital Leuven, KU Leuven, Belgium;  
6  
7

8 <sup>11</sup>KLB Gesundheitsforschung Lübeck GmbH, Lübeck, Germany;  
9

10  
11 <sup>12</sup>Clinical Research, Boehringer Ingelheim Pharma GmbH & Co. KG, Biberach an  
12  
13 der Riss, Germany;  
14  
15

16 <sup>13</sup>Medical Affairs, Boehringer Ingelheim France SAS, Paris, France;  
17  
18

19 <sup>14</sup>Global Department of Biostatistics and Data Sciences, Boehringer Ingelheim  
20  
21 Pharma GmbH & Co. KG, Biberach an der Riss, Germany;  
22  
23

24 <sup>15</sup>Translational Medicine and Clinical Pharmacology, Boehringer Ingelheim Pharma  
25  
26 GmbH & Co. KG, Biberach an der Riss, Germany  
27  
28  
29  
30  
31  
32

33 **Corresponding author:** James Crapo, National Jewish Health, 1400 Jackson  
34  
35 Street, K701, Denver, Colorado, United States  
36  
37

38 Email: [crapoj@njhealth.org](mailto:crapoj@njhealth.org)  
39  
40

41 **Short title:** Emphysema progression biomarker study  
42  
43

44 **Keywords:** Protocols & guidelines, chronic airways disease, emphysema, computed  
45  
46 tomography  
47  
48

49 **Word count:** 4053/4000  
50  
51  
52  
53  
54  
55  
56  
57  
58  
59  
60

## ABSTRACT

### Introduction

A better understanding is needed of the different phenotypes that exist for patients with chronic obstructive pulmonary disease (COPD), their relationship with the pathogenesis of COPD, and how they may affect disease progression. Biomarkers, including those associated with emphysema, may assist in characterising patients and in predicting and monitoring the course of disease. The FOOTPRINTS® study (Study 352.2069; NCT02719184) aims to identify biomarkers associated with emphysema, over a 3-year period.

### Methods and analysis

The FOOTPRINTS® study is a prospective, longitudinal, multinational (12 countries), multicentre (51 sites) biomarker study, which has enrolled a total of 463 ex-smokers, including subjects without airflow limitation (as defined by the 2015 Global Initiative for Chronic Obstructive Lung Disease [GOLD] strategy report), patients with COPD across the GOLD stages 1 to 3, and patients with COPD and alpha1-antitrypsin deficiency. The study has an observational period lasting 156 weeks that includes seven site visits and additional phone interviews. Biomarkers in blood and sputum, imaging data (computed tomography and magnetic resonance), clinical parameters, medical events of special interest and safety are being assessed at regular visits. Disease progression based on biomarker values and COPD phenotypes are being assessed using multivariate statistical prediction models.

## Ethics and dissemination

The study protocol was approved by the authorities and ethics committees/institutional review boards of the respective institutions where applicable; written informed consent has been obtained from all study participants. Ethics committee approval was obtained for all participating sites prior to enrolment of the study participants. The study results will be reported in peer-reviewed publications.

## Strengths and limitations of this study

- The study helps to address an unmet need to understand different COPD phenotypes, and to expand on our understanding of biomarkers that are associated with emphysema, and hence COPD, in a 3-year longitudinal setting.
- A subset of patients with alpha1-antitrypsin deficiency provides information on an important but rarely studied subpopulation of patients that present with earlier onset and faster progression of emphysema.
- A regular sampling schedule is employed, with frequent visits and biomarker sample collections to allow early detection of changes, if present.
- Magnetic resonance imaging and sputum collection only occur at certain study sites, and not necessarily at all planned times; hence, the smaller subsets of patients may not be representative of the entire population.
- Patients with the newly defined PRISm phenotype are not included, nor are current smokers or healthy subjects who have never smoked, thus limiting the control groups for reference. Potential exists for patient selection bias at site and patient level.



## Lay summary

Patients with chronic obstructive pulmonary disease (COPD) have different individual characteristics that may affect how the disease progresses and how they respond to different treatments. Damage to the air sacs of the lungs (called emphysema) is one of the main components that contributes to irreversible progression of COPD. We have therefore decided to focus on how different patient characteristics could be linked to emphysema and, as a result, COPD.

This study, termed the FOOTPRINTS® study, has enrolled 463 ex-smokers, including ex-smokers without COPD, patients with COPD, and a subset of patients with COPD who also have a genetic alpha1-antitrypsin deficiency that has a known link to emphysema. Patients are being assessed over 3 years, which includes seven study centre visits and additional phone calls. A range of assessments are made at each visit, including the analysis of biofluid samples such as blood for specific biological markers, lung imaging, clinical laboratory tests and safety. The results are then analysed to understand how certain markers could be used to help characterise patients with COPD.

## INTRODUCTION

Airflow limitation is a key characteristic of chronic obstructive pulmonary disease (COPD).[1,2] It is caused by small airways disease, such as obstructive bronchiolitis, and structural changes related to parenchymal destruction (emphysema).[1,2] Small airways disease and structural changes can occur alone or in combination with one another, with the degree of severity and relative contributions varying between individuals.[1]

COPD is associated with inflammation and tissue damage, which is thought to be linked to – among other aspects – an imbalance between neutrophil serine proteases (NSPs) and their inhibitors.[3,4] The serine protease inhibitor alpha1-antitrypsin (A1AT) inactivates NSPs such as neutrophil elastase (NE), proteinase 3 (PR3) and cathepsin G (Cat G), to protect lung tissue against protease-mediated damage.[5,6] To date, A1AT deficiency (A1ATD) is the only underlying gene defect that has been identified as a cause for COPD.[7] It is associated with a higher risk of developing emphysema that tends to occur at a younger age and progresses faster than for patients without A1ATD.[5,8,9] Subjects with the most severe A1ATD are usually homozygous for the ZZ allele (ZZ).[5] The resulting emphysema among patients with A1ATD is thought to be caused primarily by increased NSP activity in the lungs.[9]

NE and PR3 are responsible for the degradation of critical components of the extracellular matrix, including elastin and fibronectin, and can produce other key features of COPD, such as mucous hypersecretion.[3] When quantified, NE and PR3, as well as other proteases and biomarkers, have been associated with poorer

1  
2  
3 disease outcomes in patients with COPD, such as incidence of exacerbations and  
4  
5 higher risk of mortality.[10-13]  
6  
7

8 In the era of precision-based patient care, there is a need for a more in-depth  
9  
10 understanding of COPD patient phenotypes, pathogenesis and progression.[14,15]  
11  
12 Biomarkers may assist in characterising patients, and in predicting and monitoring  
13  
14 the course of disease, in order to better enable the development of drugs aimed at  
15  
16 slowing COPD progression.[14-16] In fact, there are encouraging signs that  
17  
18 therapies that modify NSP imbalance (e.g. augmentation therapy for A1ATD) appear  
19  
20 to alter emphysema progression, at least when considering blood and radiological  
21  
22 biomarkers of disease.[17,18] Since quantitative computed tomography (CT) is a  
23  
24 well-established method for documenting the presence, extent and progression of  
25  
26 emphysema, it is potentially useful for assessing these emerging biomarkers.[19-22]  
27  
28  
29  
30  
31  
32 This prospective, longitudinal study is investigating biomarkers in different biofluids  
33  
34 (whole blood, serum, plasma and induced sputum), imaging parameters assessed  
35  
36 by CT and magnetic resonance imaging (MRI), as well as clinical parameters  
37  
38 potentially associated with emphysema, over a 3-year period. It is hoped that  
39  
40 correlation of lung destruction biomarkers with CT densitometry findings should  
41  
42 increase our understanding of the underlying pathophysiology of emphysema  
43  
44 progression. The insights generated may support the development of future  
45  
46 treatments that could slow or halt disease progression in patients with COPD. Here  
47  
48 we report the methodology of the FOOTPRINTS® study, as described in the study  
49  
50 protocol (version 5.0; date: 29 May 2018).  
51  
52  
53  
54  
55  
56  
57  
58  
59  
60

## Objectives

The primary objective of this longitudinal study is to explore whether any of the biomarkers assessed in patients with COPD, patients with COPD plus A1ATD and subjects without airflow limitation (controls; as defined by the 2015 Global Initiative for Chronic Obstructive Lung Disease [GOLD] strategy report),[23] or specific patterns thereof, are correlated with COPD progression, particularly emphysema progression, over 156 weeks.

Further objectives, to be assessed over 156 weeks, include:

- To assess the correlation of soluble biomarkers of inflammation and lung tissue destruction with COPD severity, presence of emphysema and disease progression.
- To determine the concentration and activity of proteases in induced sputum, and to assess potential biomarkers of lung tissue destruction in sputum and blood, from patients with different severities of COPD (including a subset of patients with A1ATD) and subjects without airflow limitation (controls).
- To assess the correlation of physiological biomarkers and functional imaging biomarkers with COPD severity, the presence of emphysema and disease progression, and to evaluate MRI-based imaging biomarkers with respect to their feasibility.
- To identify COPD phenotypes and define their risk for, and rate of, disease progression.

## METHODS AND ANALYSIS

### Study design

1  
2  
3 The FOOTPRINTS study® (registered on 21 March 2016) is a multinational,  
4  
5 prospective, longitudinal, biomarker study in subjects without airflow limitation,  
6  
7 patients with COPD, and patients with COPD and A1ATD, taking place at 51 sites  
8  
9 across 12 countries (Belgium, Canada, Denmark, Finland, Germany, Japan, the  
10  
11 Republic of Korea, Poland, Spain, Sweden, United Kingdom, and the United States).  
12  
13

14 A complete list of study sites can be found at  
15  
16 <https://clinicaltrials.gov/ct2/show/NCT02719184>.  
17  
18  
19

20 The study consists of two consecutive periods (a screening period lasting up to  
21  
22 28-days and an observational period lasting 156 weeks) and includes seven site  
23  
24 visits and additional phone interviews (figure 1). The observational period is  
25  
26 completed at Visit 7 or at the discontinuation visit, which is regarded as study  
27  
28 completion. Patients are considered to be in the observational phase only after  
29  
30 completing Visit 2. All subjects who prematurely discontinue the study during the  
31  
32 observational phase are followed for vital status and COPD exacerbation status (for  
33  
34 patients with COPD and for patients with COPD and A1ATD only) via phone contact  
35  
36 until 156 weeks after Visit 2.  
37  
38  
39

40  
41 Calculation of sample size, and power calculations for annual decline in forced  
42  
43 expiratory volume in 1 second and 15th percentile density assessed by CT, are  
44  
45 provided in [Supplementary File 1 \(text 1 and tables 1 and 2\)](#).  
46  
47  
48

### 49 **Inclusion and exclusion criteria**

50  
51 Male and female participants who have signed an informed consent form consistent  
52  
53 with the International Conference on Harmonisation Good Clinical Practice (GCP)  
54  
55 guidelines prior to participation have been included, provided the following were  
56  
57 applicable:  
58  
59  
60

- Aged 40–70 years (30–70 years for patients with COPD and A1ATD).
- Ex-smokers for  $\geq 9$  months with a smoking history of  $\geq 20$  pack-years ( $\geq 10$  pack-years for patients with COPD and A1ATD).
- Body mass index (BMI) 18–35 kg/m<sup>2</sup> ( $\leq 30$  kg/m<sup>2</sup> in the MRI subset).
- Able to perform all study-related procedures.
- Required to have been on stable therapy for 4 weeks prior to Visit 1.

Participants were excluded if any of the following were applicable:

- Significant pulmonary disease (other than COPD) or other significant medical condition, for example, rheumatoid arthritis, severe liver disease or psoriasis.
- Documented history of asthma.
- Any respiratory tract infection or COPD exacerbation within 4 weeks prior to Visit 1 or during the screening period prior to Visit 2, if it was not possible to meet the rescheduling rules.
- Presence of an immunocompromising condition (e.g. HIV or history of hepatitis B or C).
- Any treatment with phosphodiesterase-4 inhibitors and maintenance treatment with methylxanthines within 3 months or 6 half-lives prior to Visit 1, and until Visit 2; patients were permitted to initiate treatment following Visit 2.
- Patients with COPD (with and without A1ATD) with newly added anti-inflammatory treatment (either respiratory or non-respiratory) or change in any therapy within 4 weeks prior to Visit 1 and during the screening period between Visit 1 and Visit 2; patients were permitted to initiate treatment following Visit 2.
- Any current or planned A1AT augmentation therapy.

- Permitted and restricted medications and therapy are detailed in [Supplementary File 1 \(table 3\)](#).
- Pregnant or lactating females.
- Previous participation in this study or participation in a parallel interventional clinical trial within 6 weeks prior to Visit 1 or during the study.

### **Patient population and recruitment**

The study is ongoing; however, enrolment is complete. In total, 463 patients were enrolled, who are described in more detail in table 1. Strategies for achieving adequate participant enrolment and retainment are described in [Supplementary File 1 \(text 1\)](#).

The study started on 22 July 2016 when the first subject was screened, and the planned end date for the study is 29 March 2021.

**Table 1. FOOTPRINTS® study participants: all enrolled subjects**

| Patient group                                                                                                                                                                                                                              | Rationale                                                                                                                                                                                                                                                                                                                                                                                                 |
|--------------------------------------------------------------------------------------------------------------------------------------------------------------------------------------------------------------------------------------------|-----------------------------------------------------------------------------------------------------------------------------------------------------------------------------------------------------------------------------------------------------------------------------------------------------------------------------------------------------------------------------------------------------------|
| 383 patients with COPD, including: <ul style="list-style-type: none"> <li>• 123 patients with mild COPD<sup>a</sup></li> <li>• 130 patients with moderate COPD<sup>b</sup></li> <li>• 130 patients with severe COPD<sup>c</sup></li> </ul> | Included to provide data on increased lung protease levels and the contribution that this may have on the development and progression of emphysema in the absence of A1ATD.                                                                                                                                                                                                                               |
| 18 patients with COPD and A1ATD <sup>d</sup>                                                                                                                                                                                               | Included as they present with an earlier onset of emphysema and a faster decline in lung function, as well as a faster change in lung density.[8]                                                                                                                                                                                                                                                         |
| 62 ex-smokers without airflow limitation                                                                                                                                                                                                   | Included to provide a comparison for biomarkers between subjects with and without airflow limitation. Subjects were required to be healthy based on a complete medical history and to have:<br>FEV <sub>1</sub> ≥80% of predicted normal and post-bronchodilator.<br>FEV <sub>1</sub> /forced vital capacity ≥lower limit of normal.<br>A mean post DL <sub>CO</sub> ≥70% of predicted normal at Visit 1. |
| <b>Total enrolled: 463 subjects</b>                                                                                                                                                                                                        |                                                                                                                                                                                                                                                                                                                                                                                                           |

<sup>a</sup>Defined as GOLD stage 1, FEV<sub>1</sub> ≥80% predicted [23]; <sup>b</sup>defined as GOLD stage 2, FEV<sub>1</sub> ≥50–<80% predicted [23]; <sup>c</sup>defined as GOLD stage 3, FEV<sub>1</sub> ≥30–<50% predicted [23]; <sup>d</sup>defined as having a diagnosis of COPD and a documented A1ATD of ZZ genotype prior to Visit 2.

A1ATD, alpha1-antitrypsin deficiency; COPD, chronic obstructive pulmonary disease; DL<sub>CO</sub>, diffusing capacity of the lungs for carbon monoxide; FEV<sub>1</sub>, forced expiratory volume in 1 second; GOLD, Global Initiative for Chronic Obstructive Lung Disease.



## Main outcome measures

The main outcome measures are change in lung density (assessed by CT), lung function decline and number, duration and severity of exacerbations over the course of the study.

## Planned analyses and assessments

Variables to be analysed include a range of soluble biomarkers, imaging biomarkers and clinical parameters, as well as medical events of special interest (MESI) and safety assessments. The pre-specified biomarkers being assessed are summarised in table 2, and the biomarker sampling schedule and overall trial design are illustrated in figure 1.

**Table 2. Summary of biomarker assessments**

| Variables                               | Biomarker assessment                                                                                                                                                                                                                                                                                                                                                                                                                                                                                           |
|-----------------------------------------|----------------------------------------------------------------------------------------------------------------------------------------------------------------------------------------------------------------------------------------------------------------------------------------------------------------------------------------------------------------------------------------------------------------------------------------------------------------------------------------------------------------|
| <b>Pre-specified soluble biomarkers</b> |                                                                                                                                                                                                                                                                                                                                                                                                                                                                                                                |
| <b>Blood</b>                            | <ul style="list-style-type: none"> <li>• Total and differential cell counts</li> <li>• DNA analyses (to determine A1AT genotype)</li> </ul>                                                                                                                                                                                                                                                                                                                                                                    |
| <b>Induced sputum*</b>                  | <ul style="list-style-type: none"> <li>• Neutrophil elastase activity</li> <li>• Proteinase 3 activity</li> <li>• Cat-G activity</li> </ul>                                                                                                                                                                                                                                                                                                                                                                    |
| <b>Serum/plasma</b>                     | <ul style="list-style-type: none"> <li>• Tissue turnover biomarkers (including neutrophil elastase-specific elastin fragment)</li> <li>• Other protease-generated neopeptides (including Cat-S cleaved decorin)</li> <li>• Soluble form of receptor for advanced glycation end products</li> <li>• Surfactant protein D</li> <li>• Lysyl oxidase like 2</li> <li>• Biomarkers of systemic inflammation (including IL-6, high-sensitivity C-reactive protein, white blood cell count and fibrinogen)</li> </ul> |
| <b>Imaging biomarkers</b>               |                                                                                                                                                                                                                                                                                                                                                                                                                                                                                                                |
| <b>CT scanning</b>                      | <ul style="list-style-type: none"> <li>• Airway morphology               <ul style="list-style-type: none"> <li>○ Mean lumen diameter</li> <li>○ % wall area</li> </ul> </li> </ul>                                                                                                                                                                                                                                                                                                                            |

|                                        |                                                                                                                                                                                                                                                                                                                                                                                                                                                                                                                                                                                                                                                                                                                                                                                               |
|----------------------------------------|-----------------------------------------------------------------------------------------------------------------------------------------------------------------------------------------------------------------------------------------------------------------------------------------------------------------------------------------------------------------------------------------------------------------------------------------------------------------------------------------------------------------------------------------------------------------------------------------------------------------------------------------------------------------------------------------------------------------------------------------------------------------------------------------------|
|                                        | <ul style="list-style-type: none"> <li>○ Mean segmental and sub-segmental airway wall thickness</li> <li>○ Square root of wall area of bronchus with internal perimeter of 10 mm (pi10)</li> <li>● Emphysema (on inspiratory CT) <ul style="list-style-type: none"> <li>○ PD15 of the CT histogram</li> <li>○ PD15 adjusted for inspired lung volume</li> <li>○ % lung voxels with attenuation <math>\leq -950</math> HU (LAA-950)</li> </ul> </li> <li>● Air trapping (on expiratory CT) <ul style="list-style-type: none"> <li>○ % lung voxels with attenuation <math>\leq -856</math> HU (LAA-856)</li> </ul> </li> <li>● Registration-based parenchyma measurements <ul style="list-style-type: none"> <li>○ % normal lung, % emphysema and % small airway disease</li> </ul> </li> </ul> |
| <b>MRI</b>                             | <ul style="list-style-type: none"> <li>● Conducted at 1.5 Tesla in a subset of subjects without airflow limitation and in patients with COPD and without A1ATD to assess functional lung parameters, including pulmonary blood flow</li> </ul>                                                                                                                                                                                                                                                                                                                                                                                                                                                                                                                                                |
| <b>Clinical parameters/assessments</b> | <ul style="list-style-type: none"> <li>● Spirometry to assess FEV<sub>1</sub> and FVC</li> <li>● DL<sub>CO</sub> and DL<sub>CO</sub> per unit of alveolar volume</li> <li>● Body plethysmography (functional residual capacity, total lung capacity, inspiratory capacity, inspiratory vital capacity, residual volume, expiratory reserve volume)</li> <li>● Pulse oximetry</li> <li>● Symptom questionnaires (modified Medical Research Council Dyspnoea Scale, COPD Assessment Test, St. George's Respiratory Questionnaire)</li> <li>● 6-minute walk test</li> <li>● Body mass index and BODE index</li> <li>● Adverse events and MESI</li> </ul>                                                                                                                                         |

\*Collected at selected sites.

A1AT, alpha1-antitrypsin; A1ATD, alpha1-antitrypsin deficiency; Cat, cathepsin; COPD, chronic obstructive pulmonary disease; CT, computed tomography; DL<sub>CO</sub>, diffusing capacity of the lungs for carbon monoxide; FEV<sub>1</sub>, forced expiratory volume in 1 second; FVC, forced vital capacity; HU, Hounsfield Units; IL-6, interleukin-6; LAA, low attenuation areas; MESI, medical events of special interest; MRI, magnetic resonance imaging; PD15, lung density at the 15<sup>th</sup> percentile point of the CT histogram.

Blood and sputum are being collected at Visits 2–7 for analysis of pre-specified soluble biomarkers, and blood is also being collected at Visit 1 to perform a genetic

1  
2  
3 test for A1ATD (figure 1). Total and differential cell counts in blood, which are being  
4 assessed within the safety laboratory assessments, are also being assessed as  
5 biomarkers. Sputum will be induced to generate sputum samples, including cell  
6 slides to assess total and differential cell count and supernatant to assess soluble  
7 biomarker levels (table 2).  
8  
9  
10  
11  
12  
13

14  
15 Chest CT scans are being conducted annually at Visits 2, 5, 6 and 7, following a  
16 specific low-dose protocol in order to minimise radiation exposure at each visit. MRI  
17 evaluation of the pulmonary vasculature and right ventricle is conducted in a subset  
18 of patients without airflow limitation and patients with COPD (not in patients with  
19 COPD and A1ATD) at Visits 2, 4, 5, 6 and 7. MESI include respiratory disorders  
20 such as pneumonia, pulmonary fibrosis, bronchiectasis and COPD exacerbations, as  
21 well as any other disorders (e.g. cardiovascular, metabolic/digestive and  
22 neurological/psychiatric) reported at the investigator's discretion. COPD  
23 exacerbations are defined as new or increased lower respiratory events or  
24 symptoms related to the underlying COPD with duration  $\geq 3$  days. Assessment of  
25 safety is carried out at Visits 1, 5, 6 and 7 unless otherwise indicated, including  
26 physical examination (plus assessment of height [Visit 1 only] and weight), vital signs  
27 (blood pressure and pulse rate), safety laboratory parameters (from blood; assessed  
28 at every site visit [Visits 1–7]) and electrocardiogram. Adverse events associated  
29 with any study procedure and MESI are collected at every site visit (Visits 1–7; MESI  
30 also assessed via telephone contact between visits; figure 1). All adverse events are  
31 followed up until they have resolved, been sufficiently characterised, or no further  
32 information can be obtained.  
33  
34  
35  
36  
37  
38  
39  
40  
41  
42  
43  
44  
45  
46  
47  
48  
49  
50  
51  
52  
53  
54  
55  
56  
57  
58  
59  
60

## Rescheduling of clinic visits

Any deviations from the planned visit schedule are being documented. Rescheduling of certain clinic visits was permitted to promote participant retention. Clinic visits that involve a lung function test may be rescheduled twice within the permitted time windows due to violation of lifestyle restrictions. Subjects should refrain from strenuous activity for at least 12 hours prior to lung function testing (and throughout the testing period); and should avoid cold temperatures, environmental smoke, dust or areas with strong odours (e.g. perfumes). Sputum induction at Visit 2 can be rescheduled by up to 3 days; at all subsequent visits, it should not be repeated if the subject is unable to produce sputum or if the sputum sample quality is not acceptable. If chest CT and MRI (where applicable) cannot be performed on the day of the scheduled visit, the imaging assessment can be rescheduled up to 14 days after the visit. If a patient experiences a COPD exacerbation or respiratory tract infection during the screening period, Visit 2 will be postponed until 4 weeks following recovery from the exacerbation or infection, and the screening period may be extended up to 8 weeks.

## Statistical analysis

Biomarker assessments and clinical outcomes measures are evaluated by regression models for repeated measures using respective point estimates and CI estimates. The correlation between individual biomarkers, and between biomarkers and other clinical outcome measures, is being assessed. Multivariate statistical prediction models for disease progression based on biomarker values and COPD phenotypes are being developed and examined. Interim analyses will also be conducted by the trial team once data from the 52-week and 104-week assessments

1  
2  
3 are available for  $\geq 70\%$  of subjects entered into the study. The purpose of this is to  
4  
5 provide information on the use of MRI and soluble biomarker assessments.  
6  
7

### 8 **Information on steering committee**

9  
10  
11 A scientific steering committee, Emphysema Progression Biomarker Study  
12  
13 (FOOTPRINTS® study) Steering Committee, was established in January 2017 to  
14  
15 discuss and evaluate key scientific data in the field of respiratory medicine, and to  
16  
17 provide independent advice and recommendations to optimise and strengthen the  
18  
19 FOOTPRINTS® biomarker study. The steering committee comprises 13 external and  
20  
21 internal scientific experts in respiratory medicine and chest radiology (Supplementary  
22  
23 **File 1; table 4**), and is conducted in adherence to industry regulations on the  
24  
25 cooperation of the pharmaceutical industry with the medical professions.[24-26]  
26  
27  
28  
29

### 30 **Data collection and management**

31  
32  
33 An interactive response technology system was used to track subject enrolment, and  
34  
35 to register clinic visits and phone calls. A central laboratory facility is handling all  
36  
37 standard safety blood laboratory analyses. Spirometry is performed using an  
38  
39 external vendor's equipment to allow for centralised readings. Electrocardiograms  
40  
41 are recorded for about a 10-second duration after the subject has rested for at least  
42  
43 5 minutes in a supine position, with electrode placement performed according to the  
44  
45 Wilson method (precordial leads) and Goldberger and Einthoven (limb leads). Pulse  
46  
47 oximetry will be performed to measure oxygen saturation; all recordings will be made  
48  
49 using the same pulse oximetry measurement device per site on the same finger of  
50  
51 the subject. Body plethysmography, DL<sub>CO</sub>, the 6-minute walk test (6MWT) and  
52  
53 sputum induction and processing (at selected sites only) are performed according to  
54  
55 international accepted guidelines as follows. Body plethysmography and DL<sub>CO</sub>  
56  
57  
58  
59  
60

1  
2  
3 measurement are being performed according to American Thoracic  
4 Society/European Respiratory Society guidelines, after salbutamol  
5 administration.[27] The 6MWT is being conducted according to ATS guidelines.[28]  
6  
7  
8 Inspiratory and expiratory CT scans are being performed according to the  
9  
10 specifications provided in [Supplementary File 1 \(table 5\)](#). Sputum induction and  
11  
12 processing are performed according to the sputum manual issued by the vendor for  
13  
14 sputum assessment and analysis.  
15  
16  
17

18  
19  
20 All samples collected for pre-specified biomarker assessments are prepared by the  
21  
22 site according to instructions given in the investigator site file until shipment to the  
23  
24 central contract research organisation. Additional blood samples (whole blood,  
25  
26 plasma and serum) will be taken at Visits 2 to 7 for future unspecified analyses, while  
27  
28 potential leftovers from pre-specified blood analysis and induced sputum will also be  
29  
30 stored and used for this purpose; these samples will be stored for up to 15 years  
31  
32 after the final study report has been signed. Biomarkers are analysed by the sponsor  
33  
34 or contractors of the sponsor. Data management and statistical evaluation are  
35  
36 conducted by the sponsor or contractors of the sponsor. Source documents are filed  
37  
38 at the investigator's site; these data are transferred to the electronic case report  
39  
40 form. Missing data may be imputed if necessary.  
41  
42  
43  
44  
45

46 A clinical trial monitor, appointed by the sponsor, ensures the good running of the  
47  
48 study and directs the clinical study team in the preparation, conduct, and reporting of  
49  
50 the study, in accordance with the sponsor's standardised operating procedures, GCP  
51  
52 guidelines, and current legislation.  
53

54  
55 Medical information obtained for individual subjects during the study is considered  
56  
57 confidential and this will be ensured by using subject identification code numbers.  
58  
59  
60

1  
2  
3 Further information on confidentiality is detailed in the informed consent form  
4  
5 (Supplementary File 2).  
6  
7

## 8 **Patient and public involvement**

9

10  
11 Patients or the public were not involved in the design, conduct, reporting or  
12  
13 dissemination plans of our research.  
14  
15

## 16 **ETHICS APPROVAL AND CONSENT TO PARTICIPATE**

17

18  
19 This study is being performed in accordance with the International Conference on  
20  
21 Harmonisation Tripartite Guideline for GCP, the Japanese GCP regulations and local  
22  
23 regulations. The protocol was approved by the authorities and IEC/IRB of the  
24  
25 respective institutions where applicable, which included study sites in Belgium,  
26  
27 Canada, Denmark, Finland, Germany, Japan, the Republic of Korea, Poland, Spain,  
28  
29 Sweden, United Kingdom and the United States. In the respective countries, the  
30  
31 ethics approval preceded the study participant's enrolment. Written informed consent  
32  
33 is obtained from all study participants. Notably, any protocol amendments will be  
34  
35 initiated only after all required legal documentation has been reviewed and/or  
36  
37 approved by the respective IRB/IEC, as applicable.  
38  
39  
40  
41  
42

## 43 **DISCUSSION**

44

45  
46 COPD is characterised by progressive airflow limitation and a decline in lung  
47  
48 function. It has also been demonstrated that emphysema, a major cause of airflow  
49  
50 limitation in COPD, is independently associated with a rapid decline in lung  
51  
52 function.[29,30] Current pharmacological treatment options for COPD and  
53  
54 emphysema do not prevent the progressive decline of FEV<sub>1</sub> – the most commonly  
55  
56 used marker of disease severity and progression in COPD.[1,31,32] However, FEV<sub>1</sub>  
57  
58  
59  
60

1  
2  
3 is poorly correlated with symptoms and some other measures of disease  
4  
5 progression.[1,33]  
6  
7

8 The heterogeneity of COPD extends to a molecular level, a concept familiar in  
9  
10 asthma, where endotype-directed therapy is now well accepted;[34] hence there is a  
11  
12 need for biomarkers that can assist with diagnosis, risk stratification and assessment  
13  
14 of therapeutic interventions.[35,36] A recent systematic review by Fermont *et al.*  
15  
16 reported that biomarkers and clinical parameters including 6MWT, fibrinogen, C-  
17  
18 reactive protein, white cell count and interleukin-6, are associated with clinical  
19  
20 outcomes in COPD and worth further investigation.[10] A systematic review of CT  
21  
22 density as a radiological biomarker came to similar conclusions.[37] It is anticipated  
23  
24 that biomarkers may facilitate a better understanding of the prognosis of COPD, help  
25  
26 to guide treatment options and allow for a greater degree of precision medicine as  
27  
28 treatment options.[35]  
29  
30  
31  
32  
33

34 So far, few studies have addressed the potential of biomarkers to predict the  
35  
36 longitudinal outcomes of COPD, and this has been assessed for a limited number of  
37  
38 biomarkers only. The COPDGene® study, which has enrolled over 10,000 smoking  
39  
40 (with or without COPD) and non-smoking subjects, is predominantly focused on  
41  
42 identifying genetic determinants for COPD susceptibility,[38] while the UK-based  
43  
44 British Lung Foundation early COPD study is currently enrolling smokers with normal  
45  
46 lung function or mild lung function abnormalities to assess the very early stages of  
47  
48 COPD development.[39] The Evaluation of COPD Longitudinally to Identify  
49  
50 Predictive Surrogate End-points (ECLIPSE) study [40] and the Subpopulations and  
51  
52 Intermediate Outcomes in COPD Study (SPIROMICS) [41] have enrolled subjects  
53  
54 with COPD and smoking/non-smoking control subjects, similar to the COPDGene®  
55  
56  
57  
58  
59  
60



1  
2  
3 study. Other longitudinal studies include the German COPD and SYstemic  
4 consequences-COmorbidities NETwork (COSYCONET) study [42] and the Canadian  
5 Cohort Obstructive Lung Disease (CanCOLD) study.[43] All of these studies plan to  
6 analyse a range of soluble biomarkers and clinical outcomes, and conduct CT  
7 imaging to help identify COPD phenotypes.[39-45]  
8  
9

10  
11  
12 This prospective, longitudinal study was designed to investigate, over a 3-year  
13 period, biomarkers in different biofluids, imaging biomarkers and clinical parameters  
14 that may be associated with emphysema. A key strength of the FOOTPRINTS®  
15 study is that it actively recruited a subset of patients with A1ATD. This is an  
16 important but rarely studied subpopulation of patients, which has not been actively  
17 recruited for in other longitudinal studies, such as the COPDGene®,[38]  
18 ECLIPSE,[40] SPIROMICS [41] and UK early COPD cohort studies.[45] Patients  
19 with A1ATD present with earlier onset of emphysema, and could help us to better  
20 understand possible markers for emphysema progression, in particular the role of  
21 NSP imbalance conditional upon A1AT levels.[9] While A1ATD is associated with a  
22 higher risk of emphysema and COPD, increased levels of serum A1AT occur in  
23 response to inflammation.[46] Interestingly, increased levels of A1AT have also been  
24 associated with worse outcomes in patients with COPD. A recent analysis of data  
25 from the Hokkaido COPD cohort study examined the association of circulating A1AT  
26 levels with the clinical course of COPD patients without A1ATD and reported that  
27 higher A1AT levels were associated with worse outcomes, including more  
28 emphysema, a worse systemic inflammation status and higher 10-year mortality.[46]  
29  
30 Our findings in patients with A1ATD could help us to further understand the complex  
31 relationship between A1AT levels and COPD disease progression.  
32  
33  
34  
35  
36  
37  
38  
39  
40  
41  
42  
43  
44  
45  
46  
47  
48  
49  
50  
51  
52  
53  
54  
55  
56  
57  
58  
59  
60

1  
2  
3 Compared with the COPDGene® study, in which assessments were scheduled at  
4 baseline, 5 years and 10 years (ongoing),[38,44,47] the FOOTPRINTS® study has  
5 more frequent visits and biomarker sample collections, similar to the ECLIPSE[40]  
6 and SPIROMICS [41] studies. In particular, the regular collection of sputum is a  
7 major asset of the FOOTPRINTS® study; sputum collection is scheduled to occur  
8 more frequently than in both the COPDGene® [44] and SPIROMICS [41] studies,  
9 and with a similar frequency to the ECLIPSE [40] study, with four collections  
10 scheduled in the first year of the study, and subsequent collections scheduled at  
11 Year 2 and Year 3. Another key strength and differentiator of the FOOTPRINTS®  
12 study is that annual chest CT scans are being performed; compared to the other  
13 longitudinal studies discussed here, and to the best of our knowledge, the  
14 FOOTPRINTS® study will provide the most regular CT imaging data. This, in addition  
15 to the frequent biomarker sampling, will allow for more robust measures of short- to  
16 medium-term decline, critical for informing clinical trials of emphysema targeted  
17 medicinal products.[40,41] The FOOTPRINTS® study is also assessing a wider  
18 range of non-genetic biomarkers and clinical parameters across the entire study  
19 population compared with the COPDGene® study, which is focused primarily on  
20 genetic analyses of DNA samples.[38,44] For example, the FOOTPRINTS® study is  
21 assessing NE, PR3 and Cat G activity, which could help us to further understand the  
22 role of these biomarkers in patients with COPD, including those with A1ATD and  
23 poorer disease prognosis.[9] In addition, FOOTPRINTS® is conducting MRI  
24 assessments, which could be valuable in improving our understanding of changes in  
25 vasculature and perfusion in the lung that may precede changes in emphysema.[48]  
26 Due to the small number of patients included in the subset analysis and the  
27  
28  
29  
30  
31  
32  
33  
34  
35  
36  
37  
38  
39  
40  
41  
42  
43  
44  
45  
46  
47  
48  
49  
50  
51  
52  
53  
54  
55  
56  
57  
58  
59  
60

1  
2  
3 challenges associated with obtaining meaningful MRI data, these findings are  
4  
5 expected to be limited.  
6  
7

8 Although the FOOTPRINTS® study is not focusing on frequent exacerbators, it is  
9  
10 anticipated that a considerable number of adverse events, medical events of special  
11  
12 interest and hospital admissions will be detected during the 3 years of follow-up. The  
13  
14 wide range of biomarkers measured in sputum and blood may help identify subjects  
15  
16 at risk for such events. In addition, the longitudinal biosampling in FOOTPRINTS®  
17  
18 will offer a unique opportunity to study the impact of exacerbations on the evolution  
19  
20 of pathogenic processes.  
21  
22  
23

24  
25 It is anticipated that the results of the FOOTPRINTS® study will complement, as well  
26  
27 as expand on, the data generated in other longitudinal studies, such as  
28  
29 COPDGene®,[38] ECLIPSE [40] and SPIROMICS.[41] It is envisaged that the results  
30  
31 of this study will increase our understanding of COPD phenotypes and the  
32  
33 underlying pathophysiology of emphysema progression, which may be of use when  
34  
35 developing drugs to reduce COPD advancement. In addition, biomarkers associated  
36  
37 with ongoing emphysematous destruction of lung parenchyma may be identified,  
38  
39 which could assist in predicting and monitoring patients' COPD disease course.  
40  
41  
42  
43

44 A potential limitation of the FOOTPRINTS® study is that sputum collection and MRI  
45  
46 only occur at certain study sites. As such, the smaller subset of subjects may not be  
47  
48 sufficiently large to represent the entire population. In addition, there is potential for  
49  
50 selection bias at site and patient levels, as the study is non-randomised and all  
51  
52 participants are required to be ex-smokers. Note that current smokers were not  
53  
54 included because they can cause high variability in the outcome if they change their  
55  
56 smoking status; since disease progression occurs despite smoking cessation,  
57  
58  
59  
60

1  
2  
3 ex-smokers were considered to be a more appropriate population. A further limitation  
4  
5 is that patients with the newly defined preserved ratio impaired spirometry (PRISm)  
6  
7 phenotype [38,49,50] and healthy subjects who have never smoked are not included.  
8  
9

10  
11 Finally, an inherent challenge in studying biomarker levels in patients with COPD is  
12  
13 the variability in biomarker levels over time. For example, a study by Dickens *et al.*  
14  
15 looked at variability in levels of biomarkers over 3 months in subjects with COPD. At  
16  
17 Month 3, fibrinogen was a highly repeatable biomarker, with levels within 25% of  
18  
19 their baseline values for 89% of study participants, yet only 21% of patients had  
20  
21 levels of C-reactive protein within 25% of baseline values.[36] In the current study,  
22  
23 the lack of a healthy never-smoker control group limits the opportunity to compare  
24  
25 the extent of biomarker fluctuations over time. The reasons for variability over time  
26  
27 are poorly understood, but the repeatability of biomarkers should be considered  
28  
29 when selecting for clinical applications.[36] Therefore, longitudinal assessment of  
30  
31 biomarkers is planned, to help understand the longitudinal stability of  
32  
33 biomarker-based phenotypes.  
34  
35  
36  
37  
38

39 The study findings will be reported in due course at research conferences and in  
40  
41 peer-reviewed journals. The study protocol and clinical study data will be available to  
42  
43 be shared after publication of the primary manuscript in a peer-reviewed journal.  
44  
45 These data will be available upon reasonable request; further details will be provided  
46  
47 in the primary manuscript.  
48  
49

## 50 51 **CONCLUSION**

52  
53  
54 Biomarkers may help to characterise patients with COPD, allow for better monitoring  
55  
56 and prediction of the disease course, and enable an increased understanding of  
57  
58 COPD itself. Subsequently, this should help us to develop drugs to reduce disease  
59  
60

1  
2  
3 progression. The FOOTPRINTS® longitudinal study is investigating biomarkers in  
4  
5 biofluids, imaging biomarkers and clinical parameters associated with emphysema  
6  
7 over a 3-year period, to increase the understanding of COPD patient phenotypes,  
8  
9 pathogenesis and disease progression.  
10  
11  
12  
13  
14  
15

## 16 **ACKNOWLEDGEMENTS**

17  
18 Vicki Cronin, PhD, at MediTech Media provided editorial assistance in the  
19  
20 development of this manuscript, funded by Boehringer Ingelheim, and Harald  
21  
22 Koegler, MD, assisted with reviewing the manuscript. The authors would like to thank  
23  
24 all the patients and healthy volunteers for participating in this trial, and also extend  
25  
26 their thanks to the investigators and study staff.  
27  
28  
29  
30  
31  
32  
33

## 34 **COMPETING INTERESTS**

35  
36  
37 J. Crapo is a Co-Principal Investigator for the COPDGene® study, and has received  
38  
39 grants from NIH/NHLBI. A. Gupta, M. Beck, B. Langellier, C. Ittrich, F. Risse and C.  
40  
41 Diefenbach are employees of Boehringer Ingelheim. D. A. Lynch has received grants  
42  
43 from NHLBI, and personal fees from Boehringer Ingelheim, Parexel, Siemens and  
44  
45 Veracyte. In addition, D. A. Lynch has a patent for 'systems and methods for  
46  
47 classifying severity of COPD' pending. H. Watz has received grants and personal  
48  
49 fees from Boehringer Ingelheim, and personal fees from AstraZeneca, Chiesi, GSK,  
50  
51 Menarini and Novartis. J. Vogel-Claussen has received grants and personal fees  
52  
53 from Boehringer Ingelheim and Novartis, and grants from GSK and Siemens  
54  
55 Healthineers. A.M. Turner has received personal fees, payment for educational talks  
56  
57  
58  
59  
60

1  
2  
3 and expenses payments for work on the FOOTPRINTS steering committee from  
4  
5 Boehringer Ingelheim, grants and personal fees from AstraZeneca, CSL Behring and  
6  
7 Grifols Biotherapeutics, and grants, personal fees and non-financial support from  
8  
9 Chiesi. R. Mroz has received personal fees from AstraZeneca, Boehringer  
10  
11 Ingelheim, GSK, Merck Sharp & Dohme, Mundipharma, Novartis and Roche. W.  
12  
13 Janssens has received grants from AstraZeneca and Chiesi. A. Ludwig-Sengpiel  
14  
15 reports receipt of a study fee for involvement in conducting the FOOTPRINTS study.  
16  
17  
18  
19

## 20 **FUNDING OF STUDY**

21  
22  
23 This study was funded and sponsored by Boehringer Ingelheim. The trial clinical  
24  
25 monitor for this study was Markus Beck (Boehringer Ingelheim Pharma GmbH & Co.  
26  
27 KG, Dept. Clinical Research Germany/Respiratory Diseases, Birkendorfer Str. 65,  
28  
29 88397 Biberach an der Riss, Germany; Phone: +49 (0) 7351 / 54 96 803).  
30  
31  
32

## 33 **AUTHORS' CONTRIBUTIONS**

34  
35 J. Crapo, A. Gupta, D. A. Lynch, J. Vogel-Claussen, H. Watz, M. Beck, C. Ittrich, F.  
36  
37 Risse and C. Diefenbach contributed towards the overall concept and design of the  
38  
39 original study protocol. B. Langellier, C. Diefenbach, M. Beck and C. Ittrich led the  
40  
41 writing of the protocol. J. Crapo, A. Gupta, D. A. Lynch, J. Vogel-Claussen, H. Watz,  
42  
43 M. Beck, B. Langellier, C. Ittrich, F. Risse and C. Diefenbach provided critical input at  
44  
45 all stages. All authors have contributed towards the development of the manuscript,  
46  
47 and have read and approved the final manuscript.  
48  
49  
50  
51  
52  
53  
54  
55  
56  
57  
58  
59  
60

## REFERENCES

1. Global Initiative for Chronic Obstructive Lung Disease. Global strategy for the diagnosis, management, and prevention of chronic obstructive pulmonary disease (2020 report). 2019. Available: <https://goldcopd.org/wp-content/uploads/2019/11/GOLD-2020-REPORT-ver1.0wms.pdf> [Accessed June 15 2020].
2. Bourdin A, Burgel PR, Chanez P, *et al*. Recent advances in COPD: pathophysiology, respiratory physiology and clinical aspects, including comorbidities. *Eur Respir Rev* 2009;18(114):198-212. doi: 10.1183/09059180.00005509
3. Sinden NJ, Stockley RA. Proteinase 3 activity in sputum from subjects with alpha-1-antitrypsin deficiency and COPD. *Eur Respir J* 2013;41(5):1042-50. doi: 10.1183/09031936.00089712
4. Barnes PJ. Inflammatory mechanisms in patients with chronic obstructive pulmonary disease. *J Allergy Clin Immunol* 2016;138(1):16-27. doi: 10.1016/j.jaci.2016.05.011
5. Brode SK, Ling SC, Chapman KR. Alpha-1 antitrypsin deficiency: a commonly overlooked cause of lung disease. *CMAJ* 2012;184(12):1365-71. doi: 10.1503/cmaj.111749
6. McCarthy C, Reeves EP, McElvaney NG. The role of neutrophils in alpha-1 antitrypsin deficiency. *Ann Am Thorac Soc* 2016;13(Suppl 4):S297-S304. doi: 10.1513/AnnalsATS.201509-634KV
7. Foreman MG, Campos M, Celedón JC. Genes and chronic obstructive pulmonary disease. *Med Clin North Am* 2012;96(4):699-711. doi: 10.1016/j.mcna.2012.02.006
8. Stockley RA, Edgar RG, Pillai A, *et al*. Individualized lung function trends in alpha-1-antitrypsin deficiency: a need for patience in order to provide patient centered management? *Int J Chron Obstruct Pulmon Dis* 2016;11:1745-56. doi: 10.2147/COPD.S111508
9. Demkow U, van Overveld FJ. Role of elastases in the pathogenesis of chronic obstructive pulmonary disease: implications for treatment. *Eur J Med Res* 2010;15(Suppl 2):27-35. doi: 10.1186/2047-783x-15-s2-27
10. Fermont JM, Masconi KL, Jensen MT, *et al*. Biomarkers and clinical outcomes in COPD: a systematic review and meta-analysis. *Thorax* 2019;74(5):439-46. doi: 10.1136/thoraxjnl-2018-211855
11. Rønnow SR, Langholm LL, Sand JMB, *et al*. Specific elastin degradation products are associated with poor outcome in the ECLIPSE COPD cohort. *Sci Rep* 2019;9(1):4064. doi: 10.1038/s41598-019-40785-2
12. Thulborn SJ, Mistry V, Brightling CE, *et al*. Neutrophil elastase as a biomarker for bacterial infection in COPD. *Respir Res* 2019;20(1):170. doi: 10.1186/s12931-019-1145-4
13. Sand JMB, Knox AJ, Lange P, *et al*. Accelerated extracellular matrix turnover during exacerbations of COPD. *Respir Res* 2015;16(1):69. doi: 10.1186/s12931-015-0225-3
14. Sidhaye VK, Nishida K, Martinez FJ. Precision medicine in COPD: where are we and where do we need to go? *Eur Respir Rev* 2018;27(149):180004. doi: 10.1183/16000617.0022-2018

15. Cazzola M, Calzetta L, Rogliani P, *et al.* The challenges of precision medicine in COPD. *Mol Diagn Ther* 2017;21(4):345-55. doi: 10.1007/s40291-017-0266-z
16. Woodruff PG, Agusti A, Roche N, *et al.* Current concepts in targeting chronic obstructive pulmonary disease pharmacotherapy: making progress towards personalised management. *Lancet* 2015;385(9979):1789-98. doi: 10.1016/S0140-6736(15)60693-6
17. Chapman KR, Burdon JGW, Piitulainen E, *et al.* Intravenous augmentation treatment and lung density in severe  $\alpha$ 1 antitrypsin deficiency (RAPID): a randomised, double-blind, placebo-controlled trial. *Lancet* 2015;386(9991):360-68. doi: 10.1016/S0140-6736(15)60860-1
18. Ma S, Lin YY, Cantor JO, *et al.* The effect of alpha-1 proteinase inhibitor on biomarkers of elastin degradation in alpha-1 antitrypsin deficiency: An analysis of the RAPID/RAPID extension trials. *Chronic Obstr Pulm Dis* 2016;4(1):34-44. doi: 10.15326/jcopdf.4.1.2016.0156
19. Coxson HO, Dirksen A, Edwards LD, *et al.* The presence and progression of emphysema in COPD as determined by CT scanning and biomarker expression: a prospective analysis from the ECLIPSE study. *The lancet Respiratory medicine* 2013;1(2):129-36.
20. Pompe E, Strand M, van Rikxoort EM, *et al.* Five-year progression of emphysema and air trapping at CT in smokers with and those without chronic obstructive pulmonary disease: results from the COPDGene study. *Radiology* 2020;295(1):218-26.
21. Schroeder JD, McKenzie AS, Zach JA, *et al.* Relationships between airflow obstruction and quantitative CT measurements of emphysema, air trapping, and airways in subjects with and without chronic obstructive pulmonary disease. *AJR AmJRoentgenol* 2013;201(3):W460-W70.
22. Stockley RA, Parr DG, Piitulainen E, *et al.* Therapeutic efficacy of alpha-1 antitrypsin augmentation therapy on the loss of lung tissue: an integrated analysis of 2 randomised clinical trials using computed tomography densitometry. *Respir Res* 2010;11(1):136.
23. Global Initiative for Chronic Obstructive Lung Disease. Global strategy for the diagnosis, management and prevention of COPD: Global Initiative for Chronic Obstructive Lung Disease (2015 report). 2015. Available: <http://goldcopd.org/> [Accessed August 3 2015].
24. European Federation of Pharmaceutical Industries and Associations. The EFPIA Code of Practice 2019. Available: <https://www.efpia.eu/relationships-code/the-efpia-code/> [Accessed March 1 2020].
25. International Federation of Pharmaceutical Manufacturers & Associations. IFPMA Code of Practice 2019. Available: <https://www.ifpma.org/resource-centre/ifpma-code-of-practice-2019/> [Accessed March 1 2020].
26. Pharmaceutical Research and Manufacturers of America. PhRMA Code on Interactions with Health Care Professionals. 2019. Available: [https://www.phrma.org/-/media/Project/PhRMA/PhRMA-Org/PhRMA-Org/PDF/A-C/Code-of-Interaction\\_FINAL21.pdf](https://www.phrma.org/-/media/Project/PhRMA/PhRMA-Org/PhRMA-Org/PDF/A-C/Code-of-Interaction_FINAL21.pdf) [Accessed March 1 2020].
27. MacIntyre N, Crapo RO, Viegi G, *et al.* Standardisation of the single-breath determination of carbon monoxide uptake in the lung. *Eur Respir J* 2005;26(4):720-35. doi: 10.1183/09031936.05.00034905



- 1
  - 2
  - 3
  - 4
  - 5
  - 6
  - 7
  - 8
  - 9
  - 10
  - 11
  - 12
  - 13
  - 14
  - 15
  - 16
  - 17
  - 18
  - 19
  - 20
  - 21
  - 22
  - 23
  - 24
  - 25
  - 26
  - 27
  - 28
  - 29
  - 30
  - 31
  - 32
  - 33
  - 34
  - 35
  - 36
  - 37
  - 38
  - 39
  - 40
  - 41
  - 42
  - 43
  - 44
  - 45
  - 46
  - 47
  - 48
  - 49
  - 50
  - 51
  - 52
  - 53
  - 54
  - 55
  - 56
  - 57
  - 58
  - 59
  - 60
28. ATS Committee on Proficiency Standards for Clinical Pulmonary Function Laboratories. ATS statement: guidelines for the six-minute walk test. *Am J Respir Crit Care Med* 2002;166(1):111-17. doi: 10.1164/ajrccm.166.1.at1102
29. Koo H-K, Jin KN, Kim DK, *et al.* Association of incidental emphysema with annual lung function decline and future development of airflow limitation. *Int J Chron Obstruct Pulmon Dis* 2016;11:161-66. doi: 10.2147/COPD.S96809
30. Nishimura M, Makita H, Nagai K, *et al.* Annual change in pulmonary function and clinical phenotype in chronic obstructive pulmonary disease. *Am J Respir Crit Care Med* 2012;185(1):44-52. doi: 10.1164/rccm.201106-0992OC
31. Welte T, Vogelmeier C, Papi A. COPD: early diagnosis and treatment to slow disease progression. *Int J Clin Pract* 2015;69(3):336-49. doi: 10.1111/ijcp.12522
32. Tantucci C, Modena D. Lung function decline in COPD. *Int J Chron Obstruct Pulmon Dis* 2012;7:95-99. doi: 10.2147/COPD.S27480
33. Nishimura K, Izumi T, Tsukino M, *et al.* Dyspnea is a better predictor of 5-year survival than airway obstruction in patients with COPD. *Chest* 2002;121(5):1434-40. doi: 10.1378/chest.121.5.1434
34. Gans MD, Gavrilova T. Understanding the immunology of asthma: Pathophysiology, biomarkers, and treatments for asthma endotypes. *Paediatr Respir Rev* 2019:[In press]. doi: 10.1016/j.prrv.2019.08.002
35. Zemans RL, Jacobson S, Keene J, *et al.* Multiple biomarkers predict disease severity, progression and mortality in COPD. *Respir Res* 2017;18(1):117. doi: 10.1186/s12931-017-0597-7
36. Dickens JA, Miller BE, Edwards LD, *et al.* COPD association and repeatability of blood biomarkers in the ECLIPSE cohort. *Respir Res* 2011;12:146. doi: 10.1186/1465-9921-12-146
37. Crossley D, Renton M, Khan M, *et al.* CT densitometry in emphysema: a systematic review of its clinical utility. *Int J Chron Obstruct Pulmon Dis* 2018;13:547-63. doi: 10.2147/COPD.S143066
38. Lowe KE, Regan EA, Anzueto A, *et al.* COPDGene® 2019: redefining the diagnosis of chronic obstructive pulmonary disease. *Chronic Obstr Pulm Dis* 2019;6(5):384-99. doi: 10.15326/jcopdf.6.5.2019.0149 [Published Online First: 2019/11/12]
39. Ritchie AI, Donaldson GC, El-Emir E, *et al.* The British Lung Foundation Early COPD Consortium - recruitment and results from an initial pilot. *Am J Respir Crit Care Med* 2019;199:A3280. doi: 10.1164/ajrccm-conference.2019.199.1\_MeetingAbstracts.A3280
40. Vestbo J, Anderson W, Coxson HO, *et al.* Evaluation of COPD Longitudinally to Identify Predictive Surrogate End-points (ECLIPSE). *Eur Respir J* 2008;31(4):869-73. doi: 10.1183/09031936.00111707
41. Couper D, LaVange LM, Han M, *et al.* Design of the subpopulations and intermediate outcomes in COPD study (SPIROMICS). *Thorax* 2014;69(5):492-95. doi: 10.1136/thoraxjnl-2013-203897
42. Karch A, Vogelmeier C, Welte T, *et al.* The German COPD cohort COSYCONET: Aims, methods and descriptive analysis of the study population at baseline. *Respir Med* 2016;114:27-37. doi: 10.1016/j.rmed.2016.03.008
43. Bourbeau J, Tan WC, Benedetti A, *et al.* Canadian Cohort Obstructive Lung Disease (CanCOLD): Fulfilling the need for longitudinal observational studies in COPD. *COPD* 2014;11(2):125-32. doi: 10.3109/15412555.2012.665520

- 1  
2  
3 44. Regan EA, Hokanson JE, Murphy JR, *et al*. Genetic epidemiology of COPD  
4 (COPDGene) study design. *COPD* 2010;7(1):32-43. doi:  
5 10.3109/15412550903499522  
6  
7 45. ClinicalTrials.gov. The BLF Early COPD Development Partnership Grant. 2018.  
8 Updated 16/04/2019. Available:  
9 <https://clinicaltrials.gov/ct2/show/NCT03480347> [Accessed February 18  
10 2020].  
11  
12 46. Takei N, Suzuki M, Makita H, *et al*. Serum alpha-1 antitrypsin levels and the  
13 clinical course of chronic obstructive pulmonary disease. *Int J Chron Obstruct*  
14 *Pulmon Dis* 2019;14:2885-93. doi: 10.2147/COPD.S225365  
15  
16 47. COPDGene. Study protocol: Genetic epidemiology of chronic obstructive  
17 pulmonary disease (COPDGene®), 2009.  
18  
19 48. Hoffman EA, Simon BA, McLennan G. State of the art. A structural and functional  
20 assessment of the lung via multidetector-row computed tomography. *Proc Am*  
21 *Thorac Soc* 2006;3(6):519-32. doi: 10.1513/pats.200603-086MS  
22  
23 49. Wan ES, Castaldi PJ, Cho MH, *et al*. Epidemiology, genetics, and subtyping of  
24 preserved ratio impaired spirometry (PRISm) in COPDGene. *Respir Res*  
25 2014;15(1):89. doi: 10.1186/s12931-014-0089-y  
26  
27 50. Wan ES, Fortis S, Regan EA, *et al*. Longitudinal phenotypes and mortality in  
28 preserved ratio impaired spirometry in the COPDGene Study. *Am J Respir*  
29 *Crit Care Med* 2018;198(11):1397-405. doi: 10.1164/rccm.201804-0663OC  
30  
31  
32  
33  
34  
35  
36  
37  
38  
39  
40  
41  
42  
43  
44  
45  
46  
47  
48  
49  
50  
51  
52  
53  
54  
55  
56  
57  
58  
59  
60

### Figure 1. Overview of trial design

<sup>a</sup>A1ATD analysis only; this occurs at Visit 1 only. <sup>b</sup>mMRC only. <sup>c</sup>Symptom questionnaires include the CAT, mMRC and SGRQ. The CAT, mMRC and SGRQ are being conducted in patients with COPD and with COPD plus A1AT deficiency only. <sup>d</sup>A full panel of haematology, blood chemistry, and coagulation parameters is performed at Visits 1, 2, 5, 6 and 7, with a reduced panel comprising of haematology, differential automatic cell counts, fibrinogen, highly sensitive C-reactive protein and creatinine performed at Visits 3 and 4.

A1ATD, alpha1-antitrypsin deficiency; CAT, COPD assessment test; COPD, chronic obstructive pulmonary disease; CT, computed tomography; MESI, medical events of special interest; mMRC, modified Medical Research Council dyspnoea scale; MRI, magnetic resonance imaging; SGRQ, St. George's Respiratory Questionnaire.

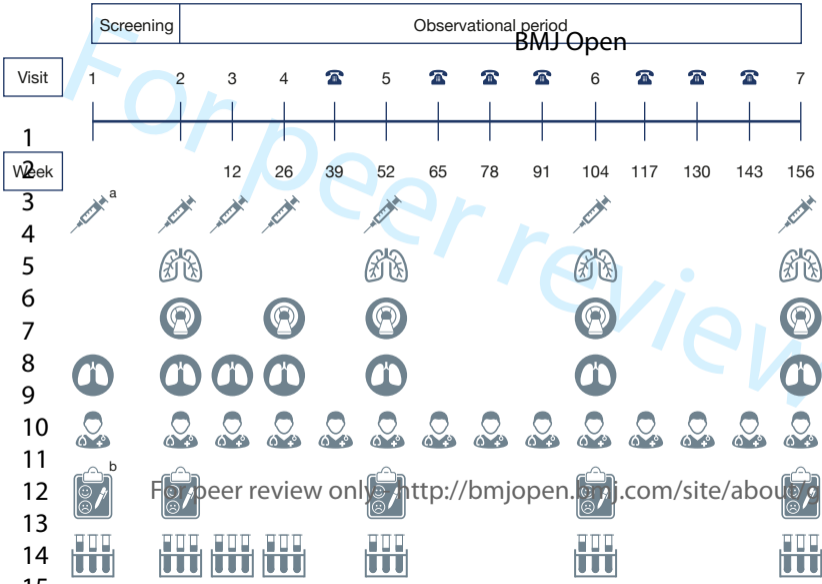

-  Soluble Biologics<sup>a</sup>
-  CT scanning
-  MRI scanning
-  Lung function testing
-  Reporting of adverse events and MESI
-  Symptom questionnaires<sup>c</sup>
-  Safety laboratory parameters<sup>d</sup>

For peer review only: <http://bmjopen.bmj.com/site/about/guidelines.xhtml>

1  
2  
3 **Supplementary Text 1. Participant enrolment and retention, sample size**  
4 **calculation, and power calculations for annual decline in forced expiratory**  
5 **volume in 1 second and 15th percentile density assessed by CT**  
6  
7  
8  
9

10 To achieve adequate participant enrolment, a recruitment plan was set up prior to  
11 the start of recruitment; this detailed the number of subjects expected at each site  
12 across the different study populations, and was based on feedback during site  
13 feasibility assessments. This plan was monitored constantly during the recruitment  
14 phase to track planned versus actual enrolment numbers. Local approaches to  
15 facilitate recruitment, such as advertising, were also used. To promote participant  
16 retention, a comprehensive strategy was set up during the course of the study. This  
17 included maintaining frequent contact with study participants (especially from Visits 5  
18 to 7, where visits are 1 year apart), for example via phonecalls and greetings cards,  
19 as well as awareness training for site staff.  
20  
21  
22  
23  
24  
25  
26  
27  
28  
29  
30  
31  
32

33 As this study is exploratory in nature, sample size calculations are focused on  
34 achieving the desired precision for biomarker estimates and relevant clinical  
35 assessments in all COPD patient groups except for the A1ATD group. This study  
36 planned to enrol 125 patients with mild COPD, 125 with moderate COPD and 125  
37 with severe COPD – by assuming a  $\leq 20\%$  dropout rate after 3 years, at least 100  
38 subjects per group are expected to contribute to the analysis by the end of the study  
39 period.  
40  
41  
42  
43  
44  
45  
46  
47  
48

49 For annual decline in forced expiratory volume in 1 second (FEV<sub>1</sub>), available  
50 information reports standard deviations (SDs) ranging from about 20 mL/year [1] to  
51 60 mL/year.[2] Using this information and considering a planned 100 subjects in  
52 each group, supplementary table 1 reports the coverage probability for the half-width  
53 of a 95% confidence interval (CI) for annual FEV<sub>1</sub> decline for a given SD. For  
54  
55  
56  
57  
58  
59  
60

1  
2  
3 example, if the observed SD is 50 mL/year, and the true half-width of the CI is 11  
4 mL/year, with 100 subjects, the probability that the observed CI covers the true CI is  
5 93.8%. The reported SD on annual decline in 15th percentile density (PD15) ranges  
6 from 3.4 g/L [3] to 5.5 g/L.[4] Using the same assumptions as for FEV<sub>1</sub> decline, we  
7 report the coverage probability of a true CI for a given SD and half-width of the CI for  
8 100 subjects (supplementary table 2).  
9  
10  
11  
12  
13  
14  
15  
16

17 In addition, with 100 subjects in each group, and allowing for up to 15 covariates, a  
18 partial Pearson correlation coefficient of 0.30 can be declared significant with 80%  
19 power between any two continuous variables (e.g. FEV<sub>1</sub> and a new biomarker) within  
20 the group.  
21  
22  
23  
24  
25  
26  
27  
28  
29  
30  
31  
32  
33  
34  
35  
36  
37  
38  
39  
40  
41  
42  
43  
44  
45  
46  
47  
48  
49  
50  
51  
52  
53  
54  
55  
56  
57  
58  
59  
60

**Supplementary Table 1. Coverage probability of 95% CIs for FEV<sub>1</sub> annual decline based on 100 subjects**

| SD | Half-width of a 95% CI |        |        |        |        |        |        |        |        |        |
|----|------------------------|--------|--------|--------|--------|--------|--------|--------|--------|--------|
|    | 6                      | 7      | 8      | 9      | 10     | 11     | 12     | 13     | 14     | 15     |
| 25 | 0.998                  | >0.999 | >0.999 | >0.999 | >0.999 | >0.999 | >0.999 | >0.999 | >0.999 | >0.999 |
| 30 | 0.557                  | 0.993  | >0.999 | >0.999 | >0.999 | >0.999 | >0.999 | >0.999 | >0.999 | >0.999 |
| 35 | 0.026                  | 0.557  | 0.983  | >0.999 | >0.999 | >0.999 | >0.999 | >0.999 | >0.999 | >0.999 |
| 40 | <0.001                 | 0.048  | 0.557  | 0.97   | >0.999 | >0.999 | >0.999 | >0.999 | >0.999 | >0.999 |
| 45 | <0.001                 | <0.001 | 0.072  | 0.557  | 0.954  | >0.999 | >0.999 | >0.999 | >0.999 | >0.999 |
| 50 | <0.001                 | <0.001 | 0.003  | 0.097  | 0.557  | 0.938  | 0.998  | >0.999 | >0.999 | >0.999 |
| 55 | <0.001                 | <0.001 | <0.001 | 0.006  | 0.122  | 0.557  | 0.921  | 0.996  | >0.999 | >0.999 |
| 60 | <0.001                 | <0.001 | <0.001 | <0.001 | 0.011  | 0.146  | 0.557  | 0.905  | 0.993  | >0.999 |
| 65 | <0.001                 | <0.001 | <0.001 | <0.001 | <0.001 | 0.018  | 0.168  | 0.557  | 0.889  | 0.988  |
| 70 | <0.001                 | <0.001 | <0.001 | <0.001 | <0.001 | 0.001  | 0.026  | 0.189  | 0.557  | 0.873  |

CI, confidence interval; FEV<sub>1</sub>, forced expiratory volume in 1 second; SD, standard deviation.

**Supplementary Table 2. Coverage probability of 95% CIs for PD15 annual decline based on 100 subjects**

| SD  | Half-width of a 95% CI |        |        |        |        |        |        |        |        |        |        |
|-----|------------------------|--------|--------|--------|--------|--------|--------|--------|--------|--------|--------|
|     | 0.55                   | 0.60   | 0.65   | 0.70   | 0.75   | 0.80   | 0.85   | 0.90   | 0.95   | 1.00   | 1.05   |
| 2.5 | 0.938                  | 0.998  | >0.999 | >0.999 | >0.999 | >0.999 | >0.999 | >0.999 | >0.999 | >0.999 | >0.999 |
| 3.0 | 0.146                  | 0.557  | 0.905  | 0.993  | >0.999 | >0.999 | >0.999 | >0.999 | >0.999 | >0.999 | >0.999 |
| 3.5 | 0.001                  | 0.026  | 0.189  | 0.557  | 0.873  | 0.983  | 0.999  | >0.999 | >0.999 | >0.999 | >0.999 |
| 4.0 | <0.001                 | <0.001 | 0.005  | 0.048  | 0.226  | 0.557  | 0.846  | 0.970  | 0.997  | >0.999 | >0.999 |
| 4.5 | <0.001                 | <0.001 | <0.001 | <0.001 | 0.011  | 0.072  | 0.257  | 0.557  | 0.822  | 0.954  | 0.993  |
| 5.0 | <0.001                 | <0.001 | <0.001 | <0.001 | <0.001 | 0.003  | 0.021  | 0.097  | 0.284  | 0.557  | 0.801  |
| 5.5 | <0.001                 | <0.001 | <0.001 | <0.001 | <0.001 | <0.001 | <0.001 | 0.006  | 0.033  | 0.122  | 0.306  |
| 6.0 | <0.001                 | <0.001 | <0.001 | <0.001 | <0.001 | <0.001 | <0.001 | <0.001 | 0.002  | 0.011  | 0.048  |

CI, confidence interval; PD15, lung density at the 15<sup>th</sup> percentile point of the CT histogram; SD, standard deviation.



**Supplementary Table 3. Overview of permitted and restricted medications/therapy**

| <b>Drug class</b>                   | <b>Prior to Visit 1</b>     | <b>Between Visits 1 and 2</b>           | <b>Observational period</b> |
|-------------------------------------|-----------------------------|-----------------------------------------|-----------------------------|
| Corticosteroid – nasal/ocular       | Permitted                   | Permitted                               | Permitted                   |
| Corticosteroid – oral, inhaled*     | Permitted <sup>†</sup>      | Permitted<br>(stable dose) <sup>‡</sup> | Permitted                   |
| Corticosteroid – i.v., i.m.         | Permitted <sup>†</sup>      | Not permitted <sup>‡</sup>              | Permitted                   |
| SABA – inhaled <sup>§</sup>         | Permitted <sup>†</sup>      | Permitted<br>(stable dose) <sup>‡</sup> | Permitted                   |
| LABA – inhaled <sup>§</sup>         | Permitted <sup>†</sup>      | Permitted<br>(stable dose) <sup>‡</sup> | Permitted                   |
| SAMA – inhaled                      | Permitted <sup>†</sup>      | Permitted<br>(stable dose) <sup>‡</sup> | Permitted                   |
| LAMA – inhaled <sup>§</sup>         | Permitted <sup>†</sup>      | Permitted<br>(stable dose) <sup>‡</sup> | Permitted                   |
| Leukotriene modifier                | Permitted <sup>†</sup>      | Permitted<br>(stable dose) <sup>‡</sup> | Permitted                   |
| Cromolyn sodium / nedocromil sodium | Permitted <sup>†</sup>      | Permitted<br>(stable dose) <sup>‡</sup> | Permitted                   |
| Methylxanthines                     | Not permitted <sup>  </sup> | Not permitted                           | Permitted                   |
| PDE-4 inhibitors                    | Not permitted <sup>  </sup> | Not permitted                           | Permitted                   |

|                                                 |                             |               |               |
|-------------------------------------------------|-----------------------------|---------------|---------------|
| Immunomodulators (e.g. methotrexate)            | Not permitted <sup>  </sup> | Not permitted | Permitted     |
| Immunotherapy (e.g. subcutaneous or sublingual) | Permitted <sup>†</sup>      | Permitted     | Permitted     |
| Biologic antagonists (e.g. omalizumab)          | Not permitted <sup>  </sup> | Not permitted | Not permitted |
| A1AT augmentation therapy                       | Not permitted               | Not permitted | Permitted     |
| Other investigational drugs                     | Not permitted               | Not permitted | Not permitted |

\*For patients taking stable maintenance OCS with a total daily dose of  $\leq 20$  mg prednisone or equivalent.

<sup>†</sup>Allowed as stable dose for at least 4 weeks before Visit 1.

<sup>‡</sup>If unstable (e.g. in case of exacerbations), extend screening period.

<sup>§</sup>Includes fixed dose combination therapy.

<sup>||</sup>Allowed before Visit 1 with a washout period of 3 months or 6 half-lives whichever is greater.

A1AT, alpha1-antitrypsin; LABA, long-acting  $\beta 2$ -adrenergic agonist; LAMA, long-acting anticholinergic; OCS, oral corticosteroids; PDE-4, phosphodiesterase-4; SABA, short-acting  $\beta 2$ -adrenergic agonist; SAMA, short-acting anticholinergic

**Supplementary Table 4. Steering committee members**

| <b>Scientific expert</b> | <b>Affiliation</b>                                                                     | <b>Role</b>              |
|--------------------------|----------------------------------------------------------------------------------------|--------------------------|
| Prof. James Crapo        | National Jewish Health, Denver (CO), USA                                               | Chair/Advisor/Discussant |
| Prof. David Lynch        | National Jewish Health, Denver (CO), USA                                               | Advisor/Discussant       |
| Dr. Henrik Watz          | Pulmonary Research Institute, Lungen Clinic Grosshansdorf GmbH, Grosshansdorf, Germany | Advisor/Discussant       |
| Prof. Pascal Chanez      | CHU Marseille – Hôpital Nord, Marseille, France                                        | Advisor/Discussant       |
| Prof. Gaetan Deslee      | CHU Reims – Hôpital Maison Blanche, Reims, France                                      | Advisor/Discussant       |
| Dr. Alice Turner         | Centre for Translational Inflammation Research, Birmingham, UK                         | Advisor/Discussant       |
| Dr. Richard Casaburi     | Los Angeles Biomedical Research Institute, Torrance (CA), USA                          | Advisor/Discussant       |
| Prof. Kazuhisa Asai      | Osaka University Graduate School of Medicine, Osaka, Japan                             | Advisor/Discussant       |
| Dr. Harald Koegler       | Boehringer Ingelheim                                                                   | Medical Project Lead     |
| Dr. Markus Beck          | Boehringer Ingelheim                                                                   | Participant/Discussant   |
| Dr. Claudia Diefenbach   | Boehringer Ingelheim                                                                   | Participant/Discussant   |
| Dr. Frank Risse          | Boehringer Ingelheim                                                                   | Participant/Discussant   |
| Dr Abhya Gupta           | Boehringer Ingelheim                                                                   | Participant/Discussant   |

**Supplementary Table 5. CT scan protocol in inspiration and expiration**

|                        |                                                                                                                                                                                                                                                                                |
|------------------------|--------------------------------------------------------------------------------------------------------------------------------------------------------------------------------------------------------------------------------------------------------------------------------|
| Scan coverage          | Lung apices to costophrenic recesses                                                                                                                                                                                                                                           |
| Scanning mode          | Helical                                                                                                                                                                                                                                                                        |
| Scanning plane         | Axial                                                                                                                                                                                                                                                                          |
| Dose modulation        | On                                                                                                                                                                                                                                                                             |
| Detector configuration | 64 x 0.625 mm (GE VCT Discovery STE, VCT Discovery 750HD 64 slice)<br>64 x 0.5 mm (Philips Brilliance 64 slice)<br>(64)32 x 0.6 mm (Siemens Definition DS, Sensation 64 slice)<br>(128)64 x 0.6 mm (Siemens Definition Edge, AS+ 128 slice, Flash 128 slice, Somatom Force)    |
| kVp                    | 120 kVp                                                                                                                                                                                                                                                                        |
| mA/mAs                 | GE (750HD, Discovery STE): Target noise index: 66.5, Maximum mA limit 100<br>Philips (Brilliance 64): Reference mAs – 46 mAs (128 mA)<br>Siemens (effective mA): Sensation 64, Definition (DS/AS 64 slice)/(AS+ 128 slice/Flash 128 slice), Edge, Force – Reference mAs 35 mAs |
| Pitch                  | GE (Discovery 750HD, Discovery STE) – 0.984<br>Philips (Brilliance 64) – 0.923<br>Siemens – 1.0                                                                                                                                                                                |
| Rotation time          | 0.5 s                                                                                                                                                                                                                                                                          |
| <b>Reconstructions</b> |                                                                                                                                                                                                                                                                                |
| Non-iterative          | GE (750HD, Discovery STE): Standard, Bone<br>Philips (Brilliance 64): B, D (YB)                                                                                                                                                                                                |

|           |                                                                                                                                                                                                                                                                                                                                                                                                          |
|-----------|----------------------------------------------------------------------------------------------------------------------------------------------------------------------------------------------------------------------------------------------------------------------------------------------------------------------------------------------------------------------------------------------------------|
|           | Siemens (Sensation 64, Definition DS/AS/AS+/Flash 64/128): B31f, B45f (B46f)<br>Siemens (Somatom Force): Bf40d, Qr44d<br>Siemens (Somatom Definition Edge): Bf37f, Bv45f                                                                                                                                                                                                                                 |
| Iterative | GE (750HD, Discovery STE): Standard ASIR 40%, Bone ASIR 40%, Standard ASIR 100%<br>Philips (Brilliance 64): B iDose L3, D (YB) iDose L3, B iDose L7<br>Siemens (Sensation 64, Definition DS/AS/AS+/Flash 64/128): I31f SAFIRE 2, I44f SAFIRE 2, I31f SAFIRE 5<br>Siemens (Somatom Force): Bf40d ADMIRE 2, Qr44d ADMIRE 2, Bf40d ADMIRE 5<br>Siemens (Somatom Definition Edge): Bf37 f2, Br54 f2, Bf37 f5 |
| Thickness | GE (Discovery 750HD, Discovery STE) – 0.625<br>Philips (Brilliance 64) – 0.67<br>Siemens – 0.75 mm                                                                                                                                                                                                                                                                                                       |
| Interval  | 0.5 mm                                                                                                                                                                                                                                                                                                                                                                                                   |
| DFOV      | Lungs (no more than a 1 cm margin outside of the lungs on either side of the scan, where the lungs are the widest in the chest)                                                                                                                                                                                                                                                                          |
| HD mode   | GE (750HD, Discovery STE): OFF<br>Philips (Brilliance 64): n/a<br>Siemens (Sensation 64, Definition Edge/DS/AS/AS+/Flash 64/128, Somatom Force): n/a                                                                                                                                                                                                                                                     |

DFOV, display field of view; HD, high definition.

## References

1. Nishimura M, Makita H, Nagai K, *et al.* Annual change in pulmonary function and clinical phenotype in chronic obstructive pulmonary disease. *Am J Respir Crit Care Med* 2012;185(1):44-52. doi: 10.1164/rccm.201106-0992OC
2. Bhatt SP, Bodduluri S, Hoffman EA, *et al.* Computed tomography measure of lung at risk and lung function decline in chronic obstructive pulmonary disease. *Am J Respir Crit Care Med* 2017;196(5):569-76.
3. Coxson HO, Dirksen A, Edwards LD, *et al.* The presence and progression of emphysema in COPD as determined by CT scanning and biomarker expression: a prospective analysis from the ECLIPSE study. *Lancet Respir Med* 2013;1(2):129-36.
4. Dirksen A, Piitulainen E, Parr D, *et al.* Exploring the role of CT densitometry: a randomised study of augmentation therapy in  $\alpha$ 1-antitrypsin deficiency. *Eur Respir J* 2009;33(6):1345-53.

**INFORMATION AND CONSENT FORM  
FOR PATIENTS WITH COPD  
(including Sputum assessment)**

**STUDY TITLE:** Observational study in healthy subjects and patients with COPD to assess the relationship between clinical, imaging and biomarker measurements, and progression of emphysema over three years.

**PROTOCOL No.:** 352.2069 FOOTPRINTS™

**SUBJECT No.:** \_\_\_\_\_

**EudraCT No.:** NA

**SPONSOR:** Boehringer Ingelheim Pharma GmbH & Co. KG  
Birkendorfer Straße 65, 88397 Biberach an der Riss, Germany

**STUDY DOCTOR:** Name, address, telephone number

Dear Study Participant,

You are being asked to participate in this observational study because:

- You are a 40 to 70 year old ex-smoker, having quit smoking more than 9 months and you have been diagnosed with Chronic Obstructive Pulmonary Disease (COPD)
- Or
- You are a 30 to 70 year old ex-smoker, having quit smoking more than 9 months you have an alpha 1-antitrypsin (A1AT) deficiency phenotype zz and you have been diagnosed with COPD.

This is a 3 year observational study to investigate if there are biomarkers, specific for chronic obstructive pulmonary disease (COPD) and especially emphysema. COPD is a common cause of lung problems and is most often due to smoking. At first, COPD may cause no symptoms or only mild symptoms. As the disease gets worse, symptoms usually become more severe. People with COPD often have symptoms such as cough, abnormal sputum production and shortness of breath, due to narrowing and blockage of the breathing tubes through which air flows in and out of the lungs. Apart from smoking cessation, there is no treatment that can prevent the progression of the disease. Destruction of lung tissue (called emphysema) is a characteristic of COPD involving damage to the air sacs (alveoli) in the lungs which are needed for gas exchange. As a result, the body does not get the oxygen it needs. Many patients with COPD, but not all, develop emphysema at some point. Biomarkers are medical signs, which can be measured, such as blood tests, imaging

# A B C D

and lung tests. Biomarkers identified in this study could contribute to discovery of new drugs for treatment of COPD and associated lung tissue destruction.

Please read the following information carefully. It contains important information to help you decide whether to participate in this research study. The study staff will have a detailed discussion with you to inform you about the study and the possible benefits and risks of your participation. Ask questions about anything that is not clear at any time. You may take home an unsigned copy of this information to think about and discuss with your family, friends or family doctor before you make your decision to participate or not.

After reading and discussing the information you should know:

- Why this research study is being done;
- What will happen during the study;
- Any possible benefits to you;
- The possible risks to you;
- Other options you could choose instead of being in this study;
- How your personal information / health information will be treated during the study and after the study is over, and which data privacy rights you have;
- Whether being in this study could involve any cost to you; and
- What to do if you have problems or questions about this study.

Participation in this study is voluntary (your choice). If you join this study, you can still stop at any time. You have the right not to sign this consent form. If you do not sign, you cannot take part in this research study. If you decide to participate, you will be asked to sign and date at the end of this form.

## PURPOSE OF THE STUDY

The purpose of this study is to evaluate biomarkers correlating to the development and progression of the COPD disease, in particular the emphysema. This study is an observational study. The study does not include administration of any investigational medicinal product and you are allowed to continue and change your standard medication during the study.

COPD is a common disease of lower airways, which significantly affects the quality of life. The disease progresses over time and eventually results in complete disability. Despite major advances in COPD treatment, none of existing drugs can stop the progression of the disease, nor lung tissue destruction (called emphysema), which occurs in every 5th patient with COPD. Also, there are no reliable biological markers (biomarkers) of the disease in sputum and blood, which would allow for earlier recognition of COPD, its progression and response to treatment other than lung function tests. Such biomarkers would also contribute to faster discovery of new drugs for COPD. This study is undertaken to collect data on various biomarkers in induced sputum and blood as well as markers derived from imaging techniques (like chest CT or MRI) in patients with different degrees of COPD and of healthy subjects, who serve as control group. It will also be checked if any of these markers reflect COPD severity or presence or progression of emphysema. This research can lead to the discovery of new diagnostics and medicines and improve the treatment of COPD including associated emphysema in the future.



# A B C D

We estimate that approximately <enter number of participants assigned to your OPU> people will participate in this study in <insert country of OPU> and approximately 455 participants worldwide.

This study has been approved by <insert applicable local authorities, if required, otherwise this statement can be deleted>.

## DESCRIPTION OF THE STUDY

The study is multi-national and involves approximately 12 participating countries. It consists of 2 consecutive periods, a screening and an observational period. The screening period lasts up to 28 days. The observational period lasts 3 years and includes 6 clinic visits and 7 additional phone contacts.

## FLOW CHART OF THE STUDY

| Study Periods                              | Screening Period | Observational Period |    |    |    |    |    |    |     |     |     |     |     |    |    |
|--------------------------------------------|------------------|----------------------|----|----|----|----|----|----|-----|-----|-----|-----|-----|----|----|
|                                            |                  | 2                    | 3  | 4  | 5  | 6  | 7  | 8  | 9   | 10  | 11  | 12  | 13  | 14 | 15 |
| Visit                                      | 1                |                      |    |    |    |    |    |    |     |     |     |     |     |    |    |
| Weeks                                      |                  | 12                   | 26 | 39 | 52 | 65 | 78 | 91 | 104 | 117 | 130 | 143 | 156 |    |    |
| Interview MESI Check                       | X                | X                    | X  | X  | X  | X  | X  | X  | X   | X   | X   | X   | X   | X  |    |
| Physical examination & Vital Signs         | X                |                      |    |    | X  |    |    |    |     | X   |     |     |     | X  |    |
| Blood collection for safety and biomarkers | X                | X                    | X  | X  | X  |    |    |    |     | X   |     |     |     | X  |    |
| Urine collection (smoking status)          | X                | X                    | X  | X  | X  |    |    |    |     | X   |     |     |     | X  |    |
| Questionnaires                             | X                | X                    |    |    | X  |    |    |    |     | X   |     |     |     | X  |    |
| Pulse oximetry                             | X                | X                    |    | X  | X  |    |    |    |     | X   |     |     |     | X  |    |
| Lung function testing                      | X                | X                    | X  | X  | X  |    |    |    |     | X   |     |     |     | X  |    |
| Review of the diary                        |                  | X                    | X  | X  | X  | X  | X  | X  | X   | X   | X   | X   | X   | X  |    |
| Chest CT                                   |                  | X                    |    |    | X  |    |    |    |     | X   |     |     |     | X  |    |
| MRI (optional)                             |                  | X                    |    | X  | X  |    |    |    |     | X   |     |     |     | X  |    |
| Induced sputum                             |                  | X                    | X  | X  | X  |    |    |    |     | X   |     |     |     | X  |    |
| Exercise testing (6 MWT)                   | X                | X                    |    |    |    |    |    |    |     | X   |     |     |     | X  |    |

## STUDY PROCEDURES

### Pre-study procedures

Before any study-related procedures are performed, you will be asked to read and sign this consent form to confirm that you wish to participate. The study will be explained to you. You can ask questions and if you agree to take part in the study, you need to sign the consent form.

By signing the Informed Consent you confirm your participation in this study.

Please note, that you are also asked to agree to collection of unspecified blood and sputum samples for biobanking. A biobank is a place where samples are long term stored until they are needed for

# A B C D

further research. This is part of this study. Please read the respective descriptive sections in this document.

## Study procedures taking place at each visit

At each clinic visit or scheduled phone visit

- You will be asked about your overall health and changes in medication.
- Please use your reminder diary and note your respiratory symptoms, hospitalization or doctor's visits and all medication you are taking.

## Study procedures at the screening visit (Visit 1)

- The study will be introduced to you.
- You will be asked for your demographics, such as sex, race, year of birth.
- Your medical and smoking history will be reviewed.
- You will have a complete physical examination, which will include measurements of blood pressure, pulse rate, temperature, weight, and height.
- An electrocardiography (ECG) will be performed. The ECG is a painless test which measures the electrical activity of the heart.
- Blood (approximately 15 ml or 3 teaspoons) will be drawn from a vein in your arm for different laboratory tests, including a genetic test to look whether you have a genetic variation called alpha 1-antitrypsin deficiency (A1ATD). A1ATD is a genetic disorder that causes defective production of alpha 1-antitrypsin (A1AT). There are several forms and degrees of the deficiency. The most common abnormal genes are the S and Z alleles. In this study only patients with the zz-gene mutation can participate. Severe A1ATD can lead to liver disease and emphysema.
- A urine sample will be taken for nicotine testing.
- For all women of child bearing potential a urine pregnancy test will be done.
- You will complete the mMRC (Modified Medical Research Council) questionnaire.
- You will have a lung function test before and after taking salbutamol/albuterol [OPU to adapt locally]. You will be asked to blow hard into the mouthpiece of the measuring device. The test determines how well your lungs work. The procedure will be explained in detail before the test.
- You will have a lung diffusion test called  $D_{LCO}$  after taking salbutamol/albuterol [OPU to adapt locally]: this lung diffusion test measures how well the lungs exchange gases. This is an important part of lung function testing, because the major function of the lungs is to allow oxygen to "diffuse" or pass into the blood from the lungs, and to allow carbon dioxide to "diffuse" from the blood into the lungs. You breathe in (inhale) air containing a very small amount of carbon monoxide, a gas existing in the atmosphere but given to you in a higher concentration. You hold your breath for 10 seconds, and then rapidly blow it out (exhale). The exhaled gas is tested to determine how much of the carbon monoxide gas was absorbed during the breath. The remaining gas will easily be eliminated from your body by normal breathing.
- A 6-minutes walking exercise test will be done. You will be asked to walk as far as possible for 6 minutes and the distance will be measured. You will get sufficient time to recover from the walking test.
- Pulse oximetry: this test measures how much oxygen your blood is carrying. By using a small device put on your forefinger your blood oxygen level can be checked.

# A B C D

- You get a reminder diary to write down if your health conditions have gotten worse, if you experienced symptoms and all medication that you are taking.

The results of the tests and/or questions at the screening visit will help the study team to decide whether you can continue in this study. If these tests show that you are eligible to participate, you will be able to continue the study. If you do not meet the eligibility criteria, you will not be able to continue.

Even if you are eligible for the study, your participation cannot be guaranteed. At the moment when the maximum number of subjects who can be included is reached, you will not be able to enter the observational phase of the study.

Visit 1 will last approximately 3 - 4 hours.

You will be scheduled to return for Visit 2 within the next 28 days.

## Study procedures in the observational period (Visits 2 to 7)

You will be scheduled to return to the clinic for 6 observational period visits. All visits during the observational period will be scheduled to begin between 06:00 and 09:00 in the mornings. Please come fasted to the visits. Please do not have anything to eat or drink, except water, for 6 hours before the visit. This is very important to get good laboratory measurements.

- First at each visit you will be asked about your medication intake, your diet and life style and your smoking status.
- You will have a complete physical examination, which will include measurements of blood pressure, pulse rate, temperature, weight, and respiratory rate at visits 5, 6 and 7.
- For all women of child bearing potential a urine pregnancy test will be performed at visits 2, 4, 5, 6 and 7.
- You will complete at visits 2, 5, 6 and 7 three questionnaires prior to pulmonary function testing. The questionnaires contain questions about your health, the breathing and COPD status: All questionnaires together will take approximately 60 minutes to complete.
- Lung function testing (each performed twice),  $D_{LCO}$  and pulse oximetry will be performed at each clinic visit, except at visit 3.
- Body plethysmography will be performed at each clinic visit, except at visit 3. You sit in a small, airtight room known as a body box. You breathe against a mouthpiece. Clips are put on your nose to shut off your nostrils. As your chest moves while you breathe, it changes the pressure and amount of air in the room and against the mouthpiece. From these changes an accurate measure of the amount of air in your lungs can be determined.
- Between lung function tests salbutamol/albuterol [OPU to adapt locally] will be administered.
- Induced sputum will be collected at each clinic visit. Sputum induction is a procedure to help you cough up secretions from your lungs more easily. The principle is to create extra moisture in the airways of the lungs by inhaling a saline enriched aerosol, which will help loosen the sputum deep in your lungs. The sputum sample will be examined further. In case you are not able to produce an acceptable sputum sample at Visit 2 and at the Visit 2 retest you will continue in the study, but no more sputum induction will be performed in the study.
- Blood samples for safety laboratory testing, and biomarker assessments will be drawn at each clinic visit (about 90 ml or 9 tablespoons).

# A B C D

- A urine sample for nicotine testing will be taken at each clinic visit.
- Your reminder diary will be reviewed at each visit.
- An ECG will be performed at visits 5, 6 and 7.
- A chest computer tomography (CT), a radiologic imaging method, enabling a detailed look into your body, will be performed at visits 2, 5, 6 and 7 between 1h and 4h after salbutamol/albuterol [OPU to adapt locally] administration for the lung function testing.
- The 6-minute walk test will be performed at visits 2, 6 and 7 after the lung function testing.

Visits 2 – 7 will last approximately 4 – 7 hours. Some visit procedures like induced sputum and/or chest CT can be rescheduled to another day (within 14 days of the original visit), e.g. if you have time constraints. In this case you will be administered with salbutamol/albuterol [OPU to adapt locally] prior to the assessment(s).

## Telephone contacts

Additionally, you will have 7 telephone contacts between clinic visits 4, 5, 6 and 7 to follow up and collect information by telephone interviews. Your reminder diary helps you to remember your respiratory symptoms, any COPD exacerbations (COPD flare up with symptoms worsened suddenly), hospitalization or health care visits, and all medication you were taking.

Please remember to inform your study team prior to scheduled telephone interviews in case you have been hospitalized. Telephone calls might take about 30 minutes.

## Study completion

Visit 7 or the discontinuation visit, in case you terminate the study early, will mark the end of the study and you have completed the study.

## Early discontinuation

If you terminate the study during the observational period for any reason, you will be asked to come to the clinic for a discontinuation visit at the time of your next scheduled visit. You will undergo the procedures of this particular visit as outlined in the flowchart. If you do not agree to undergo all procedures of the next scheduled visit, you are asked to do at least the safety assessments.

Women who become pregnant will be discontinued from further study participation and will undergo the procedures for safety assessments like for example blood collection and physical examination.

## Phone calls after early discontinuation

After you have discontinued the study early, the study team will contact you for further follow up, if you agree. You will be asked if you have experienced COPD exacerbations. If your discontinuation takes place between:

Discontinuation date between Visit 2 and 5, three telephone calls:

1. First call: 52 weeks after your Visit 2
2. Second call: 104 weeks after your Visit 2
3. Third call: 156 weeks after Visit 2

# A B C D

Discontinuation date between Visit 5 and 6, two telephone calls:

1. First call: 104 weeks after your Visit 2
2. Second call: 156 weeks after your Visit 2

Discontinuation date between Visit 6 and 7, one telephone call:

1. Call: 156 weeks after Visit 2

## YOUR RESPONSIBILITIES

- While participating in this study, you should not take part in another medication research study. You must tell your study doctor if you have been in another research study in the past 6 weeks or are currently in another research study.
- You must follow the study instructions provided by the study staff, come to all scheduled study visits and be reasonably available for the scheduled telephone visits.
- Prior to and during the lung function assessments you have to stay in in the building where the measurements are performed.
- You must tell the study doctor about all prescription and non-prescription drugs, herbal preparations and food supplements that you are taking or planning to take.
- Please refrain from strenuous activity for at least 12 hours prior to lung function testing, also avoid cold temperatures, environmental smoke, dust or areas with strong odors (e.g. perfumes).
- Please do not donate blood during the observational period of the study.
- You must fast, not have anything to eat or drink, except water, for 6 hours before all study visits.
- You might be asked to provide an additional sputum sample prior to Visit 2 that will be used for quality assurance of sputum processing. This sputum sample will be taken as described above.

## POTENTIAL BENEFITS

This study is an observational study with no change in your usual medication treatment. There will be no direct benefit for you, except for the benefit which derives from the extensive examinations and periodic monitoring of your health or disease status.

## RISKS AND/OR DISCOMFORTS

Your participation in this study requires standard medical procedures which are well known to patients with respiratory diseases. The examinations include procedures like physical examination, blood sampling, ECGs, lung function testing,  $D_{LCO}$  measurements, bodyplethysmography, chest CTs and sputum induction.

### Computed tomography

A CT scan will be done at four visits. This is a painless test, a type of X-ray exam, which shows detailed lung structures. You will be asked to strip to the waist and lie on the narrow table that will slide through a hole in the center of the CT scanner. You have to stay still during the procedure and follow the instructions when to hold your breath. The actual CT scanning takes less than 30 seconds and the entire process is usually completed within 15 minutes.

# A B C D

The scientific unit of measurement for radiation dose is the millisievert (mSv). Chest CT scans involve exposure to radiation equivalent to 20 chest x-rays (approximately 4 millisievert). Although the amount of radiation exposure is higher than a typical x-ray, the risk of harmful effects from a single exam is small. Persons are exposed to radiation from natural sources in the environment all the time. These natural "background" doses vary from area to area. The natural background radiation is 2.4 mSv per year. The additional risk of developing a fatal cancer from a single 4 mSv exposure in a person 50 years old is approximately 1 in 5000 or 0.02%. If it were to occur, it could take many years or decades for you to develop cancer related to this study. The latent period for cancer is estimated to be 6 to 10 years for blood borne cancers (leukemia, lymphoma) and 10 to 25 years for solid organ cancers. Please keep in mind that the risk from all sources of radiation is cumulative over a lifetime.

The chest CT is a very sensitive diagnostic method and reveals lung nodules in approximately 20% of people. The chest CT scan may detect lung abnormalities much earlier than other diagnostic methods, which may be life-saving in subjects at risk of lung cancer (e.g. smokers). Such finding causes anxiety and triggers further diagnostic work-up to confirm or reject malignancy. While an early diagnosis of lung cancer is critical for successful treatment, most lung nodules accidentally found on the chest CT scan turn out to be benign.

## ECG

You may experience skin irritation from the ECG electrode pads or pain when pads are removed.

## Lung function measurement (spirometry and diffusing capacity of the lungs for carbon monoxide)

Risks and discomforts associated with lung function testing may include shortness of breath, dizziness, or headache during the breathing tests. Should this occur, you may receive treatment.

## 6-minute walk test

The 6-minute walk test measures the distance that you can quickly walk on a flat, hard surface in a period of 6 minutes. To prevent any risk to your health you will be constantly supervised by specially trained medical personnel and your health will be monitored. The test may be stopped if you are unable to continue safely in the opinion of the supervising personnel. After the test you will have enough time to recover and to leave the office/clinic in good health.

## Sputum induction

Sputum induction is a painless and safe procedure. Rarely, it may cause transient wheeze or chest tightness. Let your study doctor know immediately if you feel any of these symptoms at any time during the induction procedure. These symptoms could be quickly relieved by inhaling an appropriate drug. The procedure is performed after inhalation of salbutamol/albuterol [OPU to adapt locally] that helps open up the air passages. Side-effects of salbutamol/albuterol [OPU to adapt locally] are rare and further details can be found below.

## Laboratory tests

Blood draw may cause some discomfort or mild pain, as well as redness or bruising at the site of puncture. In rare cases the puncture site can also become infected or nerves may be damaged, inducing long lasting abnormal sensations (paresthesia), impaired sensation of touch and persistent pain.

# A B C D

1  
2  
3 A total blood volume of about 500mL will be withdrawn over a period of about 3 years.  
4 Approximately 90 mL will be drawn per time point (Visit 2 – 7). The estimated blood loss will not  
5 impact your health.  
6

## 7 **Bodyplethysmography**

8 Some people may feel uncomfortable in the small plethysmography chamber called body box. Tell  
9 the study staff if you feel uncomfortable in any way during the test and keep in mind that you can  
10 open the door from the inside at any time.  
11  
12

## 13 **Salbutamol/Albuterol [OPU to adapt locally]**

14 Salbutamol/Albuterol [OPU to adapt locally] is a short-acting bronchodilator used to treat  
15 narrowed airways like in asthma or COPD. It is taken by the inhaled route for direct effect on  
16 bronchial smooth muscle. In general, salbutamol/albuterol [OPU to adapt locally] is well tolerated  
17 even at large doses. In this study, salbutamol/albuterol [OPU to adapt locally] is used only at clinic  
18 visit days in combination with some diagnostic tests like PFTs, imaging assessments or induced  
19 sputum. It is not administered for the treatment of a disease.  
20

21 The most common side effects are shaking of fingers, anxiety, headache, muscle cramps, dry  
22 mouth, and palpitation (awareness of heart beat). Other symptoms may include increase in heart  
23 rate, irregular heartbeat, flushing, myocardial ischemia (reduced blood supply of the heart muscle)  
24 (rare), and disturbances of sleep and behavior. Rarely occurring, but of importance, are allergic  
25 reactions like unexpected narrowing of the airways (can be life threatening in rare cases), rapid  
26 swelling of the facial skin rarely with life threatening breathing difficulties, skin hives with itching  
27 and redness, decrease in blood pressure, and collapse. High doses or prolonged use may cause  
28 hypokalemia (low levels of potassium in your blood).  
29  
30  
31

## 32 **ALTERNATIVES**

33 This study is for research purposes only. Your participation is voluntary. The alternative is not to  
34 participate in the study.  
35  
36

37 Please talk to the study doctor about your options before you decide whether you will take part in  
38 this study.  
39  
40

## 41 **NEW INFORMATION ABOUT THE STUDY**

42 During the study, you will be notified of changes to study procedures, which may affect your health  
43 or willingness to participate. You may be asked to sign a new consent form that shows that you  
44 have been informed of changes.  
45  
46

## 47 **INFORMATION ON BIRTH CONTROL**

48 You cannot participate in this study if you are pregnant or plan to become pregnant due to the  
49 planned radiologic procedures. If you should nevertheless become pregnant or you think you could  
50 be pregnant during the study, it is important for you to tell the study doctor or study staff prior to  
51 each clinic visit. In case of pregnancy, you will be removed from the study procedures and you  
52 will be followed up by phone calls.  
53  
54  
55  
56  
57

# A B C D

## WITHDRAWAL FROM THE STUDY PARTICIPATION

Your participation in this study is voluntary. You may choose to leave this study completely at any time. Your decision will not result in any penalty or loss of benefits to which you are otherwise entitled. Leaving the study will not affect your future medical care.

All data and samples that had already been collected up to the time of withdrawal of your consent, including data and samples gathered at any of your final assessments, will still be used to ensure the correct completion and documentation of the trial and comply with applicable law.

Your study doctor might decide to stop your study participation early without your consent when, in the study doctor's judgment, it is in your best health interest to do so or under certain circumstances listed below:

- Your inability to participate as instructed.
- Study cancellation by the sponsor or [if applicable regulatory authority/EC].
- Or for other unforeseen reasons that make it necessary to stop your participation in the study.

If you are removed from the study, the study doctor will explain to you why you were removed.

## CONFIDENTIALITY / PRIVACY AND DATA SHARING

### Use of your personally identifiable information

The part of your personal information that directly identifies you such as your name, address, or birth date will remain at the study site and can be accessed by the study doctor and other people at the site who are assisting with the study or your care. This information may also be checked at the study site by the

- sponsor, or the sponsor's representatives (including monitors hired by the sponsor through a service provider),
- ethics review board/committee that reviewed the ethical aspects of this study, and/or
- [Please adapt or delete if not applicable] domestic or foreign regulatory agencies such as the U.S. Food and Drug Administration (FDA) and European Medicines Agency (EMA) that approve medicines.

These persons check that the study is carried out correctly at the study site. They are bound by a duty of confidentiality.

### Use of your coded data

Your personally identifiable information and health information collected for the purpose of the study as well as the samples will be labelled with a unique code number. Coded data may also include data/information such as images (e.g. CTs/MRTs). The code number will be used in place of your name and other information that directly and easily identifies you, for example, address and birth date. Only the study site will have the link between your personal information and the coded data. This link will not be provided to the sponsor; only your coded data such as medical data, biomarker data, images and all other information collected in the study will be sent to the sponsor and/or contractors of the sponsor. The sponsor and/or contractors of the sponsor will take measures to protect the confidentiality and security of your coded data and your privacy in accordance with current law.



# A B C D

The sponsor and other members of the Boehringer Ingelheim Group of Companies and those working with them such as their associates, collaborators, research partners, assignees, licensees and designees, and its/their affiliated companies and agents, and other individuals and organizations, may use your coded data for the following purposes:

- Keep it electronically and analyze it to understand the study and the study results;
- Share it with domestic or foreign regulatory agencies worldwide such as the U.S. Food and Drug Administration (FDA) and European Medicines Agency (EMA), that approve medicines;
- Share it with ethics review boards/committees worldwide, or steering committee that checks whether the study was run properly.
- Analyse it to improve the quality of this study and other clinical trials

The coded data may be transferred within your country or to other countries for analysis. Where the data protection rules in other countries are not as strict as the rules in your country, the sponsor will adopt appropriate measures to provide an adequate level of protection according to EU law.

## Use of anonymized data for additional research

Anonymized data refers to data from which the subject cannot be identified by the recipient of the information. Anonymizing data is one of the strongest safeguards for the protection of subjects' identity.

The sponsor may give scientists and medical researchers in other companies, research organizations, or academic institutions access to anonymized data for further research and education beyond the disease investigated in this study. This may include research looking into improving patient care or quality and efficiency in conducting clinical studies in general. Details on the anonymization and data sharing process are set forth in the Boehringer Ingelheim "Policy on Transparency and Publication of Clinical Study Data" available at: <http://trials.boehringer-ingelheim.com>.

## Information and correction rights

You have the right to review which personal data the trial site and sponsor store about you. You can also request that incorrect personal data is corrected or that processing is restricted. You can request a copy of the contractual safeguards implementing adequate protection of personal data if your data is shared outside the EU/EEA.

In order to exercise your rights please contact the study site [if applicable: and its data protection officer (ADD EMAIL)] who will align with the sponsor. You can also ask to receive the personal information you have provided for the study in a standardized electronic format or to have them transmitted to another person of your choice. You can also contact your local data protection authority in case of questions or concerns about the handling of your personal data. In some cases, your rights can be limited under applicable laws, especially where they conflict with the conduct of the study and mandatory archiving requirements. In this case you will be informed accordingly.

If you have signed an Information and Consent Form for the optional DNA banking sample, all the information provided in this form under section "Confidentiality / Privacy and Data Sharing" your rights under data protection laws and the information on how to exercise them applies as well to the optional DNA banking consent form.

# A B C D

## Clinical study websites and publication

A description of this clinical study will be available on <http://www.clinicaltrials.gov>, as required by U.S. Law. This web site will not include information that can identify you. At most, the web site will include a summary of the results. You can search this web site at any time.

The results of the study will be published on Boehringer Ingelheim's study web site (<http://trials.boehringer-ingelheim.com>) and may also appear in other clinical study/study registries in countries in which the study is conducted. The results will not include information that can identify you.

The results of the study may also be published in a professional journal or presented at scientific meetings. Your identity will not be disclosed in those presentations.

## USE OF SAMPLES IN THIS STUDY

Blood and sputum will be collected for pre-specified as well as for unspecified analyses. Urine samples will also be collected. All samples collected during the study as described under the section "Study Procedures" will be coded and sent to the central laboratory (except pregnancy test). A part of the analyses will be done at the central laboratory. In addition, samples will be further distributed to Boehringer Ingelheim and contractors of Boehringer Ingelheim for analyses.

### Urine samples

Urine samples will be collected from all patients for the purpose of nicotine testing and (if applicable) additionally for pregnancy testing in women. Pregnancy testing will be done at the site and the sample will be discarded right after testing. Urine samples for nicotine testing will be shipped to and analyzed by the central laboratory and neither kept nor used for any future analyses.

### Pre-specified biomarker assessment

The pre-specified analyses done in blood samples comprise safety laboratory testing, testing of A1ATD and biomarker assessment. Pre-specified biomarkers will also be analysed in sputum samples. All blood and sputum samples will be collected to gain a better understanding of COPD and the influence of A1ATD. Those biomarkers include but are not limited to markers of inflammation and tissue destruction, which have been reported and/or hypothesized to be indicative of physiological and pathophysiological changes in the lungs. In addition investigations aiming at identification of new biomarkers will be done.

The DNA sample used to determine A1ATD and left over of other biomarker samples for prespecified analyses will be destroyed once this analysis has been completed.

Left over sputum samples that were not used for the pre-specified biomarker analyses will be transferred to the biobank (see section "Unspecified biomarker assessment").

### Unspecified biomarker assessment (Biobanking)

Since knowledge in the biomarker field is steadily increasing, we also ask you to consent to the collection of samples for unspecified biomarker analyses. These samples including left over sputum samples described above will be stored up to 15 years after the final study report has been written to enable these additional explorative investigations

# A B C D

1  
2  
3 Approximately 50 ml blood will be collected per visit during the observational period. All analyses  
4 aim at increasing our understanding of COPD and other respiratory diseases. This may help to  
5 develop new therapies for COPD in the future. Samples will be sent to Boehringer Ingelheim or a  
6 storage CRO for long term storage.  
7

8 The future research on your samples will not affect your present medical care. Reports from any  
9 future research with your samples and data will not be given to you or your doctor. Summaries of  
10 the research results may be published in scientific journals, on the internet, in data repositories or  
11 presented at meetings for other researchers, so that other doctors and researchers can find out about  
12 the results. In any case, your identity will not be disclosed in any publications or presentations.  
13 Subjects who donate her/his samples to BI do not retain any property rights to the materials such  
14 as samples and their derivatives and the related data.  
15  
16  
17  
18  
19  
20  
21  
22  
23  
24  
25  
26  
27  
28  
29  
30  
31  
32  
33  
34  
35  
36  
37  
38  
39  
40  
41  
42  
43  
44  
45  
46  
47  
48  
49  
50  
51  
52  
53  
54  
55  
56  
57

# A B C D

## COMPENSATION / COSTS

[Amend in accordance with local legal requirements or insurance.]

This study is funded by the sponsor. The sponsor has signed a contract with <insert CRO, applicable> to conduct this study. The sponsor <CRO on behalf of CRO> will pay the study doctor's and/or institution's for his/her expenses, time and effort to conduct this study. The study doctor and the institution/Hospital have no other financials ties to Boehringer Ingelheim.

There will be no additional costs to you for your participation in this study. All study procedures including lab work, tests, and doctor visits are provided to you free of charge by the sponsor, Boehringer Ingelheim, and will not be billed to you or your insurance carrier as long as you are participating in the study. You will receive <enter amount and/or a description of a payment schedule> to cover out-of-pocket expenses such as meals and parking for visits that are required as part of the study.

The sponsor will be owner of the study results. If commercial products or other valuable discoveries result from research using your samples and/or data, these products and discoveries may be owned, patented, licensed, or otherwise developed for commercial sale by sponsor, other researchers, or companies. If this should occur, you will not receive any financial benefits or compensation or other proprietary interest from any commercial products or discoveries that may result from such research.

## INJURY

You will receive necessary medical treatment in the event that an injury results because of your participation in this study. Financial compensation for lost wages, disability or discomfort due to an injury is not generally available. You do not give up any legal rights by signing this form. You do not release the sponsor, institution, study doctor or their agents from any liability for negligence by signing this form.

## EMERGENCY CONTACT / ETHICS CONTACT

If you have questions concerning the conduct of the study, or for any other reason you may contact Dr. \_\_\_\_\_ at \_\_\_\_\_ or the Study Coordinator \_\_\_\_\_ at \_\_\_\_\_.

In case of an emergency, please go to the nearest hospital emergency department and inform your study doctor as soon as possible.

If you have any questions about your rights as a study subject, please contact your family doctor, lawyer, or write to the committee that reviewed the ethical aspects of this study at: <insert ethics committee name and contact here>

## DECLARATION OF INFORMED CONSENT

**STUDY SUBJECT No.:** \_\_\_\_\_

My signature on this consent form means that:

- I understand that I am being asked to participate in a research study entitled: Observational study in healthy subjects and patients with COPD to assess the relationship between clinical, imaging and biomarker measurements, and progression of emphysema over three years.
- I have had this study explained to me by \_\_\_\_\_.
- I have read each page of this document.
- I have had all of my questions answered fully and to my satisfaction.
- I was given sufficient time to think in peace and quiet and decide whether to participate.
- I have been told that my participation is voluntary and I can withdraw at any time without giving any reasons.
- I agree to the collection, storage, processing, transfer and use of my personal data and biological samples (blood, urine and sputum) as explained in the above information.
- I agree that blood will be collected for biobanking and will be used for future unspecified analyses.
- I agree that left over of my sputum samples can be stored for future unspecified analyses.
- I agree that further, today unspecified analysis of my biological samples can be done during and after the study.
- I hereby expressly declare and agree that I transfer all rights of ownership of the collected samples and sample-related data to Boehringer Ingelheim Pharma (GmbH & Co. KG) so that the same may use them as described in this Informed Consent Form.
- I voluntarily consent to participate in this study.
- I will be given a signed copy of this consent document for my records

It is important that your personal doctor is aware that you are in a research study because you are undergoing examinations that could affect your health. With your permission, we will notify him/her that you are taking part in this study.

I consent to my personal doctor being notified that I am taking part in this study.

YES, I agree.                       NO, I don't agree.

I agree that in case I discontinue the study early, the study team can contact me as described above, for further follow up by telephone.

YES, I agree.                       NO, I don't agree to be contacted after early discontinuation.

## A B C D

I consent that in case I die during the time of this study my study doctor is allowed to contact my family members to ask after the circumstances and that he can review my relevant medical records.

YES

NO

\_\_\_\_\_  
**Name of Study Participant**  
*(please print)*

\_\_\_\_\_  
**Consent Signature of Study Participant**

\_\_\_\_\_  
**Date**  
 (dd mmm yyyy)

\_\_\_\_\_  
**Name of Person Obtaining Consent**  
*(please print)*

\_\_\_\_\_  
**Signature of Person Obtaining Consent**

\_\_\_\_\_  
**Date**  
 (dd mmm yyyy)

#### STATEMENT OF INVESTIGATOR / STUDY DOCTOR:

I certify that I have explained to the above individual(s) the nature and purpose of the study and the possible benefit and risks associated with participation. I have answered any questions that have been raised and the potential study participant has received a copy of this signed consent document.

I acknowledge my responsibility for the care and well-being of the above study participant, to respect the rights and wishes of the participant, and to conduct the study according to applicable Good Clinical Practice guidelines and regulations.

\_\_\_\_\_  
**Investigator Name**  
*(please print)*

\_\_\_\_\_  
**Investigator Signature**

\_\_\_\_\_  
**Date**  
 (dd mmm yyyy)

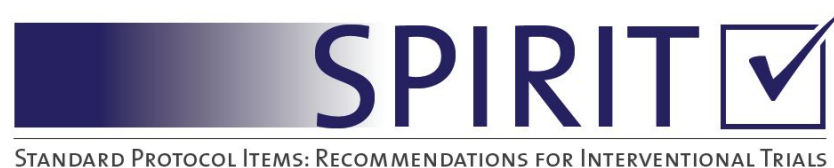

SPIRIT 2013 Checklist: Recommended items to address in a clinical trial protocol and related documents\*

| Section/item                      | ItemNo | Description                                                                                                  | Reported on page number (section)                                                                              |
|-----------------------------------|--------|--------------------------------------------------------------------------------------------------------------|----------------------------------------------------------------------------------------------------------------|
| <b>Administrative information</b> |        |                                                                                                              |                                                                                                                |
| Title                             | 1      | Descriptive title identifying the study design, population, interventions, and, if applicable, trial acronym | 1                                                                                                              |
| Trial registration                | 2a     | Trial identifier and registry name. If not yet registered, name of intended registry                         | 3 (Abstract: Introduction).                                                                                    |
|                                   | 2b     | All items from the World Health Organization Trial Registration Data Set                                     | Please see table on pages 10–15.                                                                               |
| Protocol version                  | 3      | Date and version identifier                                                                                  | 7 (Introduction).                                                                                              |
| Funding                           | 4      | Sources and types of financial, material, and other support                                                  | 22 (Acknowledgements); 23 (Funding of study).                                                                  |
| Roles and responsibilities        | 5a     | Names, affiliations, and roles of protocol contributors                                                      | 22 (Competing Interests); 23 (Authors' contributions); 38 (Supplementary Table 4. Steering committee members). |
|                                   | 5b     | Name and contact information for the trial sponsor                                                           | 23 (Funding of study).                                                                                         |

|    |                                                           |    |                                                                                                                                                                                                                                                                                          |
|----|-----------------------------------------------------------|----|------------------------------------------------------------------------------------------------------------------------------------------------------------------------------------------------------------------------------------------------------------------------------------------|
| 1  |                                                           |    |                                                                                                                                                                                                                                                                                          |
| 2  |                                                           |    |                                                                                                                                                                                                                                                                                          |
| 3  |                                                           |    |                                                                                                                                                                                                                                                                                          |
| 4  |                                                           | 5c | Role of study sponsor and funders, if any, in study design; collection, management, analysis, and interpretation of data; writing of the report; and the decision to submit the report for publication, including whether they will have ultimate authority over any of these activities |
| 5  |                                                           |    | 23 (Authors' contributions).                                                                                                                                                                                                                                                             |
| 6  |                                                           |    |                                                                                                                                                                                                                                                                                          |
| 7  |                                                           |    |                                                                                                                                                                                                                                                                                          |
| 8  |                                                           |    |                                                                                                                                                                                                                                                                                          |
| 9  |                                                           |    |                                                                                                                                                                                                                                                                                          |
| 10 |                                                           |    |                                                                                                                                                                                                                                                                                          |
| 11 |                                                           |    |                                                                                                                                                                                                                                                                                          |
| 12 |                                                           | 5d | Composition, roles, and responsibilities of the coordinating centre, steering committee, endpoint adjudication committee, data management team, and other individuals or groups overseeing the trial, if applicable (see Item 21a for data monitoring committee)                         |
| 13 |                                                           |    | 14 (Information on steering committee); 14/15 (Data collection and management); 23 (Authors' contributions); 38 (Supplementary Table 4. Steering committee members).                                                                                                                     |
| 14 |                                                           |    |                                                                                                                                                                                                                                                                                          |
| 15 |                                                           |    |                                                                                                                                                                                                                                                                                          |
| 16 |                                                           |    |                                                                                                                                                                                                                                                                                          |
| 17 |                                                           |    |                                                                                                                                                                                                                                                                                          |
| 18 |                                                           |    |                                                                                                                                                                                                                                                                                          |
| 19 |                                                           |    |                                                                                                                                                                                                                                                                                          |
| 20 |                                                           |    |                                                                                                                                                                                                                                                                                          |
| 21 | <b>Introduction</b>                                       |    |                                                                                                                                                                                                                                                                                          |
| 22 |                                                           |    |                                                                                                                                                                                                                                                                                          |
| 23 | Background and rationale                                  | 6a | Description of research question and justification for undertaking the trial, including summary of relevant studies (published and unpublished) examining benefits and harms for each intervention                                                                                       |
| 24 |                                                           |    | 7 (Introduction); 8 (Objectives); summary of interventions is not applicable for this observational biomarker study.                                                                                                                                                                     |
| 25 |                                                           |    |                                                                                                                                                                                                                                                                                          |
| 26 |                                                           |    |                                                                                                                                                                                                                                                                                          |
| 27 |                                                           |    |                                                                                                                                                                                                                                                                                          |
| 28 |                                                           | 6b | Explanation for choice of comparators                                                                                                                                                                                                                                                    |
| 29 |                                                           |    | Not applicable for this observational biomarker study.                                                                                                                                                                                                                                   |
| 30 | Objectives                                                | 7  | Specific objectives or hypotheses                                                                                                                                                                                                                                                        |
| 31 |                                                           |    | 8 (Objectives).                                                                                                                                                                                                                                                                          |
| 32 | Trial design                                              | 8  | Description of trial design including type of trial (eg, parallel group, crossover, factorial, single group), allocation ratio, and framework (eg, superiority, equivalence, noninferiority, exploratory)                                                                                |
| 33 |                                                           |    | 8/9 (Study design); 11 (Patient population and recruitment); 28 (Figure 1. Overview of trial design); 29 (Table 1. FOOTPRINTS study participants); 32/33 (Supplementary Text 1) – describes study as exploratory.                                                                        |
| 34 |                                                           |    |                                                                                                                                                                                                                                                                                          |
| 35 |                                                           |    |                                                                                                                                                                                                                                                                                          |
| 36 |                                                           |    |                                                                                                                                                                                                                                                                                          |
| 37 |                                                           |    |                                                                                                                                                                                                                                                                                          |
| 38 |                                                           |    |                                                                                                                                                                                                                                                                                          |
| 39 | <b>Methods: Participants, interventions, and outcomes</b> |    |                                                                                                                                                                                                                                                                                          |
| 40 |                                                           |    |                                                                                                                                                                                                                                                                                          |
| 41 |                                                           |    |                                                                                                                                                                                                                                                                                          |
| 42 |                                                           |    |                                                                                                                                                                                                                                                                                          |
| 43 |                                                           |    |                                                                                                                                                                                                                                                                                          |
| 44 |                                                           |    |                                                                                                                                                                                                                                                                                          |
| 45 |                                                           |    |                                                                                                                                                                                                                                                                                          |
| 46 |                                                           |    |                                                                                                                                                                                                                                                                                          |



1  
2  
3  
4  
5  
6  
7  
8  
9  
10  
11  
12  
13  
14  
15  
16  
17  
18  
19  
20  
21  
22  
23  
24  
25  
26  
27  
28  
29  
30  
31  
32  
33  
34  
35  
36  
37  
38  
39  
40  
41  
42  
43  
44  
45  
46

|                      |     |                                                                                                                                                                                                |                                                                                                                                                                          |
|----------------------|-----|------------------------------------------------------------------------------------------------------------------------------------------------------------------------------------------------|--------------------------------------------------------------------------------------------------------------------------------------------------------------------------|
| Study setting        | 9   | Description of study settings (eg, community clinic, academic hospital) and list of countries where data will be collected. Reference to where list of study sites can be obtained             | 8–9 (Study design).                                                                                                                                                      |
| Eligibility criteria | 10  | Inclusion and exclusion criteria for participants. If applicable, eligibility criteria for study centres and individuals who will perform the interventions (eg, surgeons, psychotherapists)   | 9–11 (Inclusion and exclusion criteria).                                                                                                                                 |
| Interventions        | 11a | Interventions for each group with sufficient detail to allow replication, including how and when they will be administered                                                                     | Not applicable as study was observational biomarker study. Planned analyses and assessments are detailed on pages 11–12.                                                 |
|                      | 11b | Criteria for discontinuing or modifying allocated interventions for a given trial participant (eg, drug dose change in response to harms, participant request, or improving/worsening disease) | Not applicable as an observational biomarker study. Details on study discontinuation are provided on page 9 (Study design) and rescheduling of clinic visits on page 13. |
|                      | 11c | Strategies to improve adherence to intervention protocols, and any procedures for monitoring adherence (eg, drug tablet return, laboratory tests)                                              | Not applicable. Further details provided on page 14–15 on registering clinic visits and phone calls are provided in the “data collection and management” section.        |
|                      | 11d | Relevant concomitant care and interventions that are permitted or prohibited during the trial                                                                                                  | 36/37 (Supplementary Table 3. Overview of permitted and restricted medications/therapy).                                                                                 |

|                                                             |                      |    |                                                                                                                                                                                                                                                                                                                                                                                |                                                                                      |
|-------------------------------------------------------------|----------------------|----|--------------------------------------------------------------------------------------------------------------------------------------------------------------------------------------------------------------------------------------------------------------------------------------------------------------------------------------------------------------------------------|--------------------------------------------------------------------------------------|
| 1<br>2<br>3<br>4<br>5<br>6<br>7<br>8<br>9<br>10<br>11<br>12 | Outcomes             | 12 | Primary, secondary, and other outcomes, including the specific measurement variable (eg, systolic blood pressure), analysis metric (eg, change from baseline, final value, time to event), method of aggregation (eg, median, proportion), and time point for each outcome. Explanation of the clinical relevance of chosen efficacy and harm outcomes is strongly recommended | 8 (Objectives); 11 (Main outcome measures); 11–12 Planned analyses and assessments); |
| 13<br>14<br>15<br>16<br>17                                  | Participant timeline | 13 | Time schedule of enrolment, interventions (including any run-ins and washouts), assessments, and visits for participants. A schematic diagram is highly recommended (see Figure)                                                                                                                                                                                               | 9 (Study design); 28 (Figure 1. Overview of trial design);                           |
| 18<br>19<br>20<br>21<br>22<br>23                            | Sample size          | 14 | Estimated number of participants needed to achieve study objectives and how it was determined, including clinical and statistical assumptions supporting any sample size calculations                                                                                                                                                                                          | 32 (Supplementary text 1); 34 (Supplementary Table 1); 35 (Supplementary Table 2)    |
| 24<br>25<br>26<br>27                                        | Recruitment          | 15 | Strategies for achieving adequate participant enrolment to reach target sample size                                                                                                                                                                                                                                                                                            | 32/33 (Supplementary Text 1)                                                         |

### Methods: Assignment of interventions (for controlled trials)

#### Allocation:

|                                                                      |                     |     |                                                                                                                                                                                                                                                                                                                                                          |                                                 |
|----------------------------------------------------------------------|---------------------|-----|----------------------------------------------------------------------------------------------------------------------------------------------------------------------------------------------------------------------------------------------------------------------------------------------------------------------------------------------------------|-------------------------------------------------|
| 31<br>32<br>33<br>34<br>35<br>36<br>37<br>38<br>39<br>40<br>41<br>42 | Sequence generation | 16a | Method of generating the allocation sequence (eg, computer-generated random numbers), and list of any factors for stratification. To reduce predictability of a random sequence, details of any planned restriction (eg, blocking) should be provided in a separate document that is unavailable to those who enrol participants or assign interventions | Not applicable (observational biomarker study). |
|----------------------------------------------------------------------|---------------------|-----|----------------------------------------------------------------------------------------------------------------------------------------------------------------------------------------------------------------------------------------------------------------------------------------------------------------------------------------------------------|-------------------------------------------------|

1  
2  
3  
4  
5  
6  
7  
8  
9  
10  
11  
12  
13  
14  
15  
16  
17  
18  
19  
20  
21  
22  
23  
24  
25  
26  
27  
28  
29  
30  
31  
32  
33  
34  
35  
36  
37  
38  
39  
40  
41  
42  
43  
44  
45  
46

|                                  |     |                                                                                                                                                                                                           |                 |
|----------------------------------|-----|-----------------------------------------------------------------------------------------------------------------------------------------------------------------------------------------------------------|-----------------|
| Allocation concealment mechanism | 16b | Mechanism of implementing the allocation sequence (eg, central telephone; sequentially numbered, opaque, sealed envelopes), describing any steps to conceal the sequence until interventions are assigned | Not applicable. |
|----------------------------------|-----|-----------------------------------------------------------------------------------------------------------------------------------------------------------------------------------------------------------|-----------------|

|                |     |                                                                                                                           |                 |
|----------------|-----|---------------------------------------------------------------------------------------------------------------------------|-----------------|
| Implementation | 16c | Who will generate the allocation sequence, who will enrol participants, and who will assign participants to interventions | Not applicable. |
|----------------|-----|---------------------------------------------------------------------------------------------------------------------------|-----------------|

|                    |     |                                                                                                                                           |                 |
|--------------------|-----|-------------------------------------------------------------------------------------------------------------------------------------------|-----------------|
| Blinding (masking) | 17a | Who will be blinded after assignment to interventions (eg, trial participants, care providers, outcome assessors, data analysts), and how | Not applicable. |
|--------------------|-----|-------------------------------------------------------------------------------------------------------------------------------------------|-----------------|

|  |     |                                                                                                                                                      |                 |
|--|-----|------------------------------------------------------------------------------------------------------------------------------------------------------|-----------------|
|  | 17b | If blinded, circumstances under which unblinding is permissible, and procedure for revealing a participant's allocated intervention during the trial | Not applicable. |
|--|-----|------------------------------------------------------------------------------------------------------------------------------------------------------|-----------------|

**Methods: Data collection, management, and analysis**

|                         |     |                                                                                                                                                                                                                                                                                                                                                                                                              |                                                                                                                       |
|-------------------------|-----|--------------------------------------------------------------------------------------------------------------------------------------------------------------------------------------------------------------------------------------------------------------------------------------------------------------------------------------------------------------------------------------------------------------|-----------------------------------------------------------------------------------------------------------------------|
| Data collection methods | 18a | Plans for assessment and collection of outcome, baseline, and other trial data, including any related processes to promote data quality (eg, duplicate measurements, training of assessors) and a description of study instruments (eg, questionnaires, laboratory tests) along with their reliability and validity, if known. Reference to where data collection forms can be found, if not in the protocol | 14/15 (Data collection and management); 39/40 (Supplementary Table 5. CT scan protocol in inspiration and expiration) |
|-------------------------|-----|--------------------------------------------------------------------------------------------------------------------------------------------------------------------------------------------------------------------------------------------------------------------------------------------------------------------------------------------------------------------------------------------------------------|-----------------------------------------------------------------------------------------------------------------------|

|  |     |                                                                                                                                                                                           |                                                                                                                             |
|--|-----|-------------------------------------------------------------------------------------------------------------------------------------------------------------------------------------------|-----------------------------------------------------------------------------------------------------------------------------|
|  | 18b | Plans to promote participant retention and complete follow-up, including list of any outcome data to be collected for participants who discontinue or deviate from intervention protocols | 9 (Study design) provides information on discontinuation; 13 (Rescheduling of clinic visits); 32/33 (Supplementary text 1). |
|--|-----|-------------------------------------------------------------------------------------------------------------------------------------------------------------------------------------------|-----------------------------------------------------------------------------------------------------------------------------|

|    |                            |     |                                                                                                                                                                                                                                                                                                                                       |                                                                                                                                          |
|----|----------------------------|-----|---------------------------------------------------------------------------------------------------------------------------------------------------------------------------------------------------------------------------------------------------------------------------------------------------------------------------------------|------------------------------------------------------------------------------------------------------------------------------------------|
| 1  |                            |     |                                                                                                                                                                                                                                                                                                                                       |                                                                                                                                          |
| 2  |                            |     |                                                                                                                                                                                                                                                                                                                                       |                                                                                                                                          |
| 3  |                            |     |                                                                                                                                                                                                                                                                                                                                       |                                                                                                                                          |
| 4  | Data management            | 19  | Plans for data entry, coding, security, and storage, including any related processes to promote data quality (eg, double data entry; range checks for data values). Reference to where details of data management procedures can be found, if not in the protocol                                                                     | 14/15 (Data collection and management)                                                                                                   |
| 5  |                            |     |                                                                                                                                                                                                                                                                                                                                       |                                                                                                                                          |
| 6  |                            |     |                                                                                                                                                                                                                                                                                                                                       |                                                                                                                                          |
| 7  |                            |     |                                                                                                                                                                                                                                                                                                                                       |                                                                                                                                          |
| 8  |                            |     |                                                                                                                                                                                                                                                                                                                                       |                                                                                                                                          |
| 9  |                            |     |                                                                                                                                                                                                                                                                                                                                       |                                                                                                                                          |
| 10 | Statistical methods        | 20a | Statistical methods for analysing primary and secondary outcomes. Reference to where other details of the statistical analysis plan can be found, if not in the protocol                                                                                                                                                              | 13 (Statistical analysis)                                                                                                                |
| 11 |                            |     |                                                                                                                                                                                                                                                                                                                                       |                                                                                                                                          |
| 12 |                            |     |                                                                                                                                                                                                                                                                                                                                       |                                                                                                                                          |
| 13 |                            |     |                                                                                                                                                                                                                                                                                                                                       |                                                                                                                                          |
| 14 |                            |     |                                                                                                                                                                                                                                                                                                                                       |                                                                                                                                          |
| 15 |                            |     |                                                                                                                                                                                                                                                                                                                                       |                                                                                                                                          |
| 16 |                            | 20b | Methods for any additional analyses (eg, subgroup and adjusted analyses)                                                                                                                                                                                                                                                              | 13 (Statistical analysis)                                                                                                                |
| 17 |                            |     |                                                                                                                                                                                                                                                                                                                                       |                                                                                                                                          |
| 18 |                            |     |                                                                                                                                                                                                                                                                                                                                       |                                                                                                                                          |
| 19 |                            | 20c | Definition of analysis population relating to protocol non-adherence (eg, as randomised analysis), and any statistical methods to handle missing data (eg, multiple imputation)                                                                                                                                                       | Note, analysis population will be described in future publications.<br>15 (Data collection and management) for handling of missing data. |
| 20 |                            |     |                                                                                                                                                                                                                                                                                                                                       |                                                                                                                                          |
| 21 |                            |     |                                                                                                                                                                                                                                                                                                                                       |                                                                                                                                          |
| 22 |                            |     |                                                                                                                                                                                                                                                                                                                                       |                                                                                                                                          |
| 23 |                            |     |                                                                                                                                                                                                                                                                                                                                       |                                                                                                                                          |
| 24 |                            |     |                                                                                                                                                                                                                                                                                                                                       |                                                                                                                                          |
| 25 | <b>Methods: Monitoring</b> |     |                                                                                                                                                                                                                                                                                                                                       |                                                                                                                                          |
| 26 |                            |     |                                                                                                                                                                                                                                                                                                                                       |                                                                                                                                          |
| 27 | Data monitoring            | 21a | Composition of data monitoring committee (DMC); summary of its role and reporting structure; statement of whether it is independent from the sponsor and competing interests; and reference to where further details about its charter can be found, if not in the protocol. Alternatively, an explanation of why a DMC is not needed | No DMC was implemented for the FOOTPRINTS study, as it is a non-interventional, purely observational biomarker study.                    |
| 28 |                            |     |                                                                                                                                                                                                                                                                                                                                       |                                                                                                                                          |
| 29 |                            |     |                                                                                                                                                                                                                                                                                                                                       |                                                                                                                                          |
| 30 |                            |     |                                                                                                                                                                                                                                                                                                                                       |                                                                                                                                          |
| 31 |                            |     |                                                                                                                                                                                                                                                                                                                                       |                                                                                                                                          |
| 32 |                            |     |                                                                                                                                                                                                                                                                                                                                       |                                                                                                                                          |
| 33 |                            |     |                                                                                                                                                                                                                                                                                                                                       |                                                                                                                                          |
| 34 |                            |     |                                                                                                                                                                                                                                                                                                                                       |                                                                                                                                          |
| 35 |                            |     |                                                                                                                                                                                                                                                                                                                                       |                                                                                                                                          |
| 36 |                            |     |                                                                                                                                                                                                                                                                                                                                       |                                                                                                                                          |
| 37 |                            |     |                                                                                                                                                                                                                                                                                                                                       |                                                                                                                                          |
| 38 |                            |     |                                                                                                                                                                                                                                                                                                                                       |                                                                                                                                          |
| 39 |                            |     |                                                                                                                                                                                                                                                                                                                                       |                                                                                                                                          |
| 40 |                            |     |                                                                                                                                                                                                                                                                                                                                       |                                                                                                                                          |
| 41 |                            |     |                                                                                                                                                                                                                                                                                                                                       |                                                                                                                                          |
| 42 |                            |     |                                                                                                                                                                                                                                                                                                                                       |                                                                                                                                          |
| 43 |                            |     |                                                                                                                                                                                                                                                                                                                                       |                                                                                                                                          |
| 44 |                            |     |                                                                                                                                                                                                                                                                                                                                       |                                                                                                                                          |
| 45 |                            |     |                                                                                                                                                                                                                                                                                                                                       |                                                                                                                                          |
| 46 |                            |     |                                                                                                                                                                                                                                                                                                                                       |                                                                                                                                          |

1  
2  
3  
4  
5  
6  
7  
8  
9  
10  
11  
12  
13  
14  
15  
16  
17  
18  
19  
20  
21  
22  
23  
24  
25  
26  
27  
28  
29  
30  
31  
32  
33  
34  
35  
36  
37  
38  
39  
40  
41  
42  
43  
44  
45  
46

|                                 |     |                                                                                                                                                                                                                                  |                                                                                                                                                                                                                                           |
|---------------------------------|-----|----------------------------------------------------------------------------------------------------------------------------------------------------------------------------------------------------------------------------------|-------------------------------------------------------------------------------------------------------------------------------------------------------------------------------------------------------------------------------------------|
|                                 | 21b | Description of any interim analyses and stopping guidelines, including who will have access to these interim results and make the final decision to terminate the trial                                                          | 13 (Statistical analysis); details on stopping guidelines are not applicable for this study (observational biomarker study) and access to study results is generally not restricted to a dedicated group since there are no blinded data. |
| Harms                           | 22  | Plans for collecting, assessing, reporting, and managing solicited and spontaneously reported adverse events and other unintended effects of trial interventions or trial conduct                                                | 12 (Planned analyses and assessments)                                                                                                                                                                                                     |
| Auditing                        | 23  | Frequency and procedures for auditing trial conduct, if any, and whether the process will be independent from investigators and the sponsor                                                                                      | 15 (Data collection and management)                                                                                                                                                                                                       |
| <b>Ethics and dissemination</b> |     |                                                                                                                                                                                                                                  |                                                                                                                                                                                                                                           |
| Research ethics approval        | 24  | Plans for seeking research ethics committee/institutional review board (REC/IRB) approval                                                                                                                                        | 4 (Ethics and dissemination); 16 (ETHICS APPROVAL AND CONSENT TO PARTICIPATE)                                                                                                                                                             |
| Protocol amendments             | 25  | Plans for communicating important protocol modifications (eg, changes to eligibility criteria, outcomes, analyses) to relevant parties (eg, investigators, REC/IRBs, trial participants, trial registries, journals, regulators) | 16 (ETHICS APPROVAL AND CONSENT TO PARTICIPATE).                                                                                                                                                                                          |
| Consent or assent               | 26a | Who will obtain informed consent or assent from potential trial participants or authorised surrogates, and how (see Item 32)                                                                                                     | 4 (Ethics and dissemination); 9/10 (Inclusion and exclusion criteria)                                                                                                                                                                     |

|                               |     |                                                                                                                                                                                                                                                                                     |                                                                                                                                                                     |
|-------------------------------|-----|-------------------------------------------------------------------------------------------------------------------------------------------------------------------------------------------------------------------------------------------------------------------------------------|---------------------------------------------------------------------------------------------------------------------------------------------------------------------|
|                               | 26b | Additional consent provisions for collection and use of participant data and biological specimens in ancillary studies, if applicable                                                                                                                                               | Not applicable.                                                                                                                                                     |
| Confidentiality               | 27  | How personal information about potential and enrolled participants will be collected, shared, and maintained in order to protect confidentiality before, during, and after the trial                                                                                                | 15/16 (Data collection and management)                                                                                                                              |
| Declaration of interests      | 28  | Financial and other competing interests for principal investigators for the overall trial and each study site                                                                                                                                                                       | 22 (Competing interests); Financial disclosure is not a prerequisite for this type of study, so this information was not collected for all principal investigators. |
| Access to data                | 29  | Statement of who will have access to the final trial dataset, and disclosure of contractual agreements that limit such access for investigators                                                                                                                                     | 21 (Discussion)                                                                                                                                                     |
| Ancillary and post-trial care | 30  | Provisions, if any, for ancillary and post-trial care, and for compensation to those who suffer harm from trial participation                                                                                                                                                       | Not applicable (observational biomarker study)                                                                                                                      |
| Dissemination policy          | 31a | Plans for investigators and sponsor to communicate trial results to participants, healthcare professionals, the public, and other relevant groups (eg, via publication, reporting in results databases, or other data sharing arrangements), including any publication restrictions | 21 (Discussion)                                                                                                                                                     |
|                               | 31b | Authorship eligibility guidelines and any intended use of professional writers                                                                                                                                                                                                      | 22 (Acknowledgments); 23 (AUTHORS' CONTRIBUTIONS)                                                                                                                   |

1  
2  
3  
4  
5  
6  
7  
8  
9  
10  
11  
12  
13  
14  
15  
16  
17  
18  
19  
20  
21  
22  
23  
24  
25  
26  
27  
28  
29  
30  
31  
32  
33  
34  
35  
36  
37  
38  
39  
40  
41  
42  
43  
44  
45  
46

|  |     |                                                                                                                 |                 |
|--|-----|-----------------------------------------------------------------------------------------------------------------|-----------------|
|  | 31c | Plans, if any, for granting public access to the full protocol, participant-level dataset, and statistical code | 21 (Discussion) |
|--|-----|-----------------------------------------------------------------------------------------------------------------|-----------------|

**Appendices**

|                            |    |                                                                                                                                                                                                |                                                                                                                     |
|----------------------------|----|------------------------------------------------------------------------------------------------------------------------------------------------------------------------------------------------|---------------------------------------------------------------------------------------------------------------------|
| Informed consent materials | 32 | Model consent form and other related documentation given to participants and authorised surrogates                                                                                             | Provided in the Supplementary. Described on page 4 (Ethics and dissemination); 9 (Inclusion and exclusion criteria) |
| Biological specimens       | 33 | Plans for collection, laboratory evaluation, and storage of biological specimens for genetic or molecular analysis in the current trial and for future use in ancillary studies, if applicable | 14/15 (Data collection and management)                                                                              |

---

\*It is strongly recommended that this checklist be read in conjunction with the SPIRIT 2013 Explanation & Elaboration for important clarification on the items. Amendments to the protocol should be tracked and dated. The SPIRIT checklist is copyrighted by the SPIRIT Group under the Creative Commons "[Attribution-NonCommercial-NoDerivs 3.0 Unported](https://creativecommons.org/licenses/by-nc-nd/3.0/)" license.

| WHO Trial Registration Data Set (Version 1.3.1)                                                                                                                                                                                                                                                                                                                                                                                                                                                                                                                                                                                                                                                                                                                                                                                                                                                                                                     | Reported on page number (section) |
|-----------------------------------------------------------------------------------------------------------------------------------------------------------------------------------------------------------------------------------------------------------------------------------------------------------------------------------------------------------------------------------------------------------------------------------------------------------------------------------------------------------------------------------------------------------------------------------------------------------------------------------------------------------------------------------------------------------------------------------------------------------------------------------------------------------------------------------------------------------------------------------------------------------------------------------------------------|-----------------------------------|
| <p><b>1. Primary Registry and Trial Identifying Number</b><br/>Name of Primary Registry, and the unique ID number assigned by the Primary Registry to this trial.</p>                                                                                                                                                                                                                                                                                                                                                                                                                                                                                                                                                                                                                                                                                                                                                                               | 3 (Abstract).                     |
| <p><b>2. Date of Registration in Primary Registry</b><br/>Date when trial was officially registered in the Primary Registry.</p>                                                                                                                                                                                                                                                                                                                                                                                                                                                                                                                                                                                                                                                                                                                                                                                                                    | 9 (Study design).                 |
| <p><b>3. Secondary Identifying Numbers</b><br/>Other identifiers besides the Trial Identifying Number allocated by the Primary Registry, if any. These include:</p> <ul style="list-style-type: none"> <li>- The Universal Trial Number (UTN)</li> <li>- Identifiers assigned by the sponsor (record Sponsor name and Sponsor-issued trial number (e.g. protocol number))</li> <li>- Other trial registration numbers issued by other Registries (both Primary and Partner Registries in the WHO Registry Network, and other registries)</li> <li>- Identifiers issued by funding bodies, collaborative research groups, regulatory authorities, ethics committees / institutional review boards, etc.</li> <li>- All secondary identifiers will have 2 elements: an identifier for the issuing authority (e.g. NCT, ISRCTN, ACTRN) plus a number.</li> </ul> <p>There is no limit to the number of secondary identifiers that can be provided.</p> | 3 (Abstract).                     |
| <p><b>4. Source(s) of Monetary or Material Support</b><br/>Major source(s) of monetary or material support for the trial (e.g. funding agency, foundation, company, institution).</p>                                                                                                                                                                                                                                                                                                                                                                                                                                                                                                                                                                                                                                                                                                                                                               | 23 (FUNDING OF STUDY).            |
| <p><b>5. Primary Sponsor</b><br/>The individual, organization, group or other legal entity which takes responsibility for initiating, managing and/or financing a study. The Primary Sponsor is responsible for ensuring that the trial is properly registered. The Primary Sponsor may or may not be the main</p>                                                                                                                                                                                                                                                                                                                                                                                                                                                                                                                                                                                                                                  | 23 (FUNDING OF STUDY).            |



|                                                                                                                                                                                                                                                                                                                                                                                                                                                                                                                                                                                                                                                                                |                                                  |
|--------------------------------------------------------------------------------------------------------------------------------------------------------------------------------------------------------------------------------------------------------------------------------------------------------------------------------------------------------------------------------------------------------------------------------------------------------------------------------------------------------------------------------------------------------------------------------------------------------------------------------------------------------------------------------|--------------------------------------------------|
| funder.                                                                                                                                                                                                                                                                                                                                                                                                                                                                                                                                                                                                                                                                        |                                                  |
| <p><b>6. Secondary Sponsor(s)</b><br/>Additional individuals, organizations or other legal persons, if any, that have agreed with the primary sponsor to take on responsibilities of sponsorship.</p> <p>A secondary sponsor may have agreed to:</p> <ul style="list-style-type: none"> <li>- take on all the responsibilities of sponsorship jointly with the primary sponsor; or form a group with the Primary Sponsor in which the responsibilities of sponsorship are allocated among the members of the group; or act as the Primary Sponsor's legal representative in relation to some or all of the trial sites.</li> </ul>                                             | Not applicable.                                  |
| <p><b>7. Contact for Public Queries</b><br/>Email address, telephone number and postal address of the contact who will respond to general queries, including information about current recruitment status.</p> <p>“Note: The information provided in here is functional and not personal, it is recommended to provide institutional and not personal information. By providing this information the registrant consents that the information provided can or may be published on a public website. Once provided the information cannot be redacted or anonymized as a result of new privacy legislation such as the European General Data Protection Regulation (GDPR)”.</p> | 2 (Corresponding author); 23 (FUNDING OF STUDY). |
| <p><b>8. Contact for Scientific Queries</b><br/>There must be clearly assigned responsibility for scientific leadership to a named Principal Investigator. The PI may delegate responsibility for dealing with scientific enquiries to a scientific contact for the trial. This scientific contact will be listed in addition to the PI.</p>                                                                                                                                                                                                                                                                                                                                   | 2 (Corresponding author); 23 (FUNDING OF STUDY). |

|                                                                                                                                                                                                                                                                                                                                                                                                                                                                                                                                                                                                                                                                                                                                                                                                                                                                                                                                                                                                                 |                                                |
|-----------------------------------------------------------------------------------------------------------------------------------------------------------------------------------------------------------------------------------------------------------------------------------------------------------------------------------------------------------------------------------------------------------------------------------------------------------------------------------------------------------------------------------------------------------------------------------------------------------------------------------------------------------------------------------------------------------------------------------------------------------------------------------------------------------------------------------------------------------------------------------------------------------------------------------------------------------------------------------------------------------------|------------------------------------------------|
| <p>“Note: The information provided in here is functional and not personal, it is recommended to provide institutional and not personal information. By providing this information the registrant consents that the information provided can or may be published on a public website. Once provided the information cannot be redacted or anonymized as a result of new privacy legislation such as the European General Data Protection Regulation (GDPR)”.</p> <p>The contact for scientific queries must include:<br/> Name and title, email address, telephone number, postal address and affiliation of the Principal Investigator, and;<br/> Email address, telephone number, postal address and affiliation of the contact for scientific queries about the trial (if applicable).<br/> The details for the scientific contact may be generic (that is, there does not need to be a named individual): e.g. a generic email address for research team members qualified to answer scientific queries.</p> |                                                |
| <p><b>9. Public Title</b><br/> Title intended for the lay public in easily understood language.</p>                                                                                                                                                                                                                                                                                                                                                                                                                                                                                                                                                                                                                                                                                                                                                                                                                                                                                                             | <p>‘FOOTPRINTS’ study included throughout.</p> |
| <p><b>10. Scientific Title</b><br/> Scientific title of the study as it appears in the protocol submitted for funding and ethical review. Include trial acronym if available.</p>                                                                                                                                                                                                                                                                                                                                                                                                                                                                                                                                                                                                                                                                                                                                                                                                                               | <p>‘FOOTPRINTS’ study included throughout.</p> |
| <p><b>11. Countries of Recruitment</b><br/> The countries from which participants will be, are intended to be, or have been recruited at the time of registration.</p>                                                                                                                                                                                                                                                                                                                                                                                                                                                                                                                                                                                                                                                                                                                                                                                                                                          | <p>9 (Study design).</p>                       |
| <p><b>12. Health Condition(s) or Problem(s) Studied</b><br/> Primary health condition(s) or problem(s) studied (e.g., depression, breast cancer, medication error).</p> <p>If the study is conducted in healthy human volunteers belonging to the target population of the intervention (e.g. preventive or screening</p>                                                                                                                                                                                                                                                                                                                                                                                                                                                                                                                                                                                                                                                                                       | <p>6–7 (Introduction); 8 (Objectives).</p>     |

|                                                                                                                                                                                                                                                                                                                                                                                                                                                                       |                                                                                                                          |
|-----------------------------------------------------------------------------------------------------------------------------------------------------------------------------------------------------------------------------------------------------------------------------------------------------------------------------------------------------------------------------------------------------------------------------------------------------------------------|--------------------------------------------------------------------------------------------------------------------------|
| <p>interventions), enter the particular health condition(s) or problem(s) being prevented.</p>                                                                                                                                                                                                                                                                                                                                                                        |                                                                                                                          |
| <p><b>13. Intervention(s)</b><br/>For each arm of the trial record a brief intervention name plus an intervention description.</p>                                                                                                                                                                                                                                                                                                                                    | <p>Not applicable as observational biomarker study.</p>                                                                  |
| <p><b>14. Key Inclusion and Exclusion Criteria</b><br/>Inclusion and exclusion criteria for participant selection, including age and sex. Other selection criteria may relate to clinical diagnosis and co-morbid conditions; exclusion criteria are often used to ensure patient safety.</p> <p>If the study is conducted in healthy human volunteers not belonging to the target population (e.g. a preliminary safety study), enter "healthy human volunteer".</p> | <p>9–10 (Inclusion and exclusion criteria).</p>                                                                          |
| <p><b>15. Study Type</b></p>                                                                                                                                                                                                                                                                                                                                                                                                                                          | <p>9 (Study design).</p>                                                                                                 |
| <p><b>16. Date of First Enrollment</b><br/>Anticipated or actual date of enrolment of the first participant.</p>                                                                                                                                                                                                                                                                                                                                                      | <p>11 (Patient population and recruitment).</p>                                                                          |
| <p><b>17. Sample Size</b><br/>Sample Size consists of:<br/>Number of participants that the trial plans to enrol in total.<br/>Number of participants that the trial has enrolled.</p>                                                                                                                                                                                                                                                                                 | <p>32/33 (Supplementary Text 1)<br/>29 (Table 1. FOOTPRINTS® study participants: all enrolled subjects)</p>              |
| <p><b>18. Recruitment Status</b></p>                                                                                                                                                                                                                                                                                                                                                                                                                                  | <p>11 (Patient population and recruitment).</p>                                                                          |
| <p><b>19. Primary Outcome(s)</b><br/>Outcomes are events, variables, or experiences that are measured because it is believed that they may be influenced by the intervention.</p> <p>The Primary Outcome should be the outcome used in sample size</p>                                                                                                                                                                                                                | <p>8 (Objectives); 11–12 (Planned analyses and assessments) details specifics on measurement methods and timepoints.</p> |

|                                                                                                                                                                                                                                                                                                                                                                                                                                                                                                                                                                                   |                                                                                                                                                                                                                                                                                                                                                 |
|-----------------------------------------------------------------------------------------------------------------------------------------------------------------------------------------------------------------------------------------------------------------------------------------------------------------------------------------------------------------------------------------------------------------------------------------------------------------------------------------------------------------------------------------------------------------------------------|-------------------------------------------------------------------------------------------------------------------------------------------------------------------------------------------------------------------------------------------------------------------------------------------------------------------------------------------------|
| <p>calculations, or the main outcome(s) used to determine the effects of the intervention(s). Most trials should have only one primary outcome.</p> <p>For each primary outcome provide:<br/> The name of the outcome (do not use abbreviations)<br/> The metric or method of measurement used (be as specific as possible)<br/> The timepoint(s) of primary interest</p>                                                                                                                                                                                                         |                                                                                                                                                                                                                                                                                                                                                 |
| <p><b>20. Key Secondary Outcomes</b><br/> Secondary outcomes are outcomes which are of secondary interest or that are measured at timepoints of secondary interest. A secondary outcome may involve the same event, variable, or experience as the primary outcome, but measured at timepoints other than those of primary interest.</p> <p>As for primary outcomes, for each secondary outcome provide:<br/> The name of the outcome (do not use abbreviations)<br/> The metric or method of measurement used (be as specific as possible)<br/> The timepoint(s) of interest</p> | <p>8 (Objectives); 11–12 (Planned analyses and assessments) details specifics on measurement methods and timepoints.</p>                                                                                                                                                                                                                        |
| <p><b>21. Ethics Review</b><br/> The ethics review process information of the trial record in the primary register database. It consists of:<br/> Status (possible values: Not approved, Approved, Not Available)<br/> Date of approval<br/> Name and contact details of Ethics committee(s)</p>                                                                                                                                                                                                                                                                                  | <p>16 (ETHICS APPROVAL AND CONSENT TO PARTICIPATE);<br/> Trial record can be found at<br/> <a href="https://clinicaltrials.gov/ct2/show/NCT02719184">https://clinicaltrials.gov/ct2/show/NCT02719184</a>;<br/> List of ethics committees (name/contact details) provided for purposes of submission (not to be included in the publication)</p> |
| <p><b>22. Completion date</b><br/> Date of study completion: The date on which the final data for a clinical study were collected (commonly referred to as, "last subject, last visit").</p>                                                                                                                                                                                                                                                                                                                                                                                      | <p>11 (Patient population and recruitment).</p>                                                                                                                                                                                                                                                                                                 |
| <p><b>23. Summary Results</b><br/> It consists of:</p>                                                                                                                                                                                                                                                                                                                                                                                                                                                                                                                            | <p>Not applicable – trial ongoing.</p>                                                                                                                                                                                                                                                                                                          |

1  
2  
3  
4  
5  
6  
7  
8  
9  
10  
11  
12  
13  
14  
15  
16  
17  
18  
19  
20  
21  
22  
23  
24  
25  
26  
27  
28  
29  
30  
31  
32  
33  
34  
35  
36  
37  
38  
39  
40  
41  
42  
43  
44  
45  
46

|                                                                                                                                                                                                                                                                                                                                                                                                                                                                                                                                                                                                                                                                                                                                                                                                                                                                                                                                                                                                                                                                                                                                                                                                                                                                                                                                                                                                               |                         |
|---------------------------------------------------------------------------------------------------------------------------------------------------------------------------------------------------------------------------------------------------------------------------------------------------------------------------------------------------------------------------------------------------------------------------------------------------------------------------------------------------------------------------------------------------------------------------------------------------------------------------------------------------------------------------------------------------------------------------------------------------------------------------------------------------------------------------------------------------------------------------------------------------------------------------------------------------------------------------------------------------------------------------------------------------------------------------------------------------------------------------------------------------------------------------------------------------------------------------------------------------------------------------------------------------------------------------------------------------------------------------------------------------------------|-------------------------|
| <p>Date of posting of results summaries<br/> Date of the first journal publication of results<br/> URL hyperlink(s) related to results and publications<br/> Baseline Characteristics: Data collected at the beginning of a clinical study for all participants and for each arm or comparison group. These data include demographics, such as age and sex, and study-specific measures.<br/> Participant flow: Information to document the progress and numbers of research participants through each stage of a study in a flow diagram or tabular format.<br/> Adverse events: An unfavorable change in the health of a participant, including abnormal laboratory findings, and all serious adverse events and deaths that happen during a clinical study or within a certain time period after the study has ended. This change may or may not be caused by the intervention being studied.<br/> Outcome measures: A table of data for each primary and secondary outcome measure and their respective measurement of precision (eg a 95% confidence interval) by arm (that is, initial assignment of participants to arms or groups) or comparison group (that is, analysis groups), including the result(s) of scientifically appropriate statistical analyses that were performed on the outcome measure data, if any.<br/> URL link to protocol file(s) with version and date<br/> Brief summary</p> |                         |
| <p><b>24. IPD sharing statement</b><br/> Statement regarding the intended sharing of deidentified individual clinical trial participant-level data (IPD). Should indicate whether or not IPD will be shared, what IPD will be shared, when, by what mechanism, with whom and for what types of analyses. It consists of:<br/> Plan to share IPD (Yes, No)<br/> Plan description</p>                                                                                                                                                                                                                                                                                                                                                                                                                                                                                                                                                                                                                                                                                                                                                                                                                                                                                                                                                                                                                           | <p>21 (Discussion).</p> |

# BMJ Open

## FOOTPRINTS® study protocol: rationale and methodology of a 3-year longitudinal observational study to phenotype patients with COPD

|                                 |                                                                                                                                                                                                                                                                                                                                                                                                                                                                                                                                                                                                                                                                                                                                                                                                                                                                                                                                                                                                                                                                                                                                                                                                                                                                                                                                                                                                                                                                                                        |
|---------------------------------|--------------------------------------------------------------------------------------------------------------------------------------------------------------------------------------------------------------------------------------------------------------------------------------------------------------------------------------------------------------------------------------------------------------------------------------------------------------------------------------------------------------------------------------------------------------------------------------------------------------------------------------------------------------------------------------------------------------------------------------------------------------------------------------------------------------------------------------------------------------------------------------------------------------------------------------------------------------------------------------------------------------------------------------------------------------------------------------------------------------------------------------------------------------------------------------------------------------------------------------------------------------------------------------------------------------------------------------------------------------------------------------------------------------------------------------------------------------------------------------------------------|
| Journal:                        | <i>BMJ Open</i>                                                                                                                                                                                                                                                                                                                                                                                                                                                                                                                                                                                                                                                                                                                                                                                                                                                                                                                                                                                                                                                                                                                                                                                                                                                                                                                                                                                                                                                                                        |
| Manuscript ID                   | bmjopen-2020-042526.R1                                                                                                                                                                                                                                                                                                                                                                                                                                                                                                                                                                                                                                                                                                                                                                                                                                                                                                                                                                                                                                                                                                                                                                                                                                                                                                                                                                                                                                                                                 |
| Article Type:                   | Protocol                                                                                                                                                                                                                                                                                                                                                                                                                                                                                                                                                                                                                                                                                                                                                                                                                                                                                                                                                                                                                                                                                                                                                                                                                                                                                                                                                                                                                                                                                               |
| Date Submitted by the Author:   | 01-Dec-2020                                                                                                                                                                                                                                                                                                                                                                                                                                                                                                                                                                                                                                                                                                                                                                                                                                                                                                                                                                                                                                                                                                                                                                                                                                                                                                                                                                                                                                                                                            |
| Complete List of Authors:       | <p>Crapo, James; National Jewish Health, Gupta, Abhya; Boehringer Ingelheim International GmbH, TA Inflammation Med</p> <p>Lynch, David; National Jewish Health, Department of Radiology</p> <p>Vogel-Claussen, Jens; Hannover Medical School, Diagnostic and Interventional Radiology; Biomedical research in endstage and obstructive lung disease Hannover (BREATH)</p> <p>Watz, Henrik; LungenClinic Grosshansdorf GmbH, Pulmonary Research Institute; Airway Research Center North (ARCN)</p> <p>Turner, Alice; University of Birmingham, Institute of Applied Health Research</p> <p>Mroz, Robert; Medical University of Bialystok, 2nd Department of Lung Diseases and Tuberculosis</p> <p>Janssens, Wim; KU Leuven University Hospitals Leuven, Laboratory of Respiratory Diseases and Thoracic surgery, Department of Respiratory Medicine</p> <p>Ludwig-Sengpiel, Andrea; KLB Gesundheitsforschung Lübeck GmbH</p> <p>Beck, Markus; Boehringer Ingelheim Pharma GmbH and Co KG Biberach, Clinical Research</p> <p>Langellier, Bérengère; Boehringer Ingelheim France SAS, Medical Affairs</p> <p>Ittrich, Carina; Boehringer Ingelheim Pharma GmbH and Co KG Biberach, Global Department of Biostatistics and Data Sciences</p> <p>Risse, Frank; Boehringer Ingelheim Pharma GmbH and Co KG Biberach, Translational Medicine and Clinical Pharmacology</p> <p>Diefenbach, Claudia; Boehringer Ingelheim Pharma GmbH and Co KG Biberach, Translational Medicine and Clinical Pharmacology</p> |
| <b>Primary Subject Heading</b>: | Respiratory medicine                                                                                                                                                                                                                                                                                                                                                                                                                                                                                                                                                                                                                                                                                                                                                                                                                                                                                                                                                                                                                                                                                                                                                                                                                                                                                                                                                                                                                                                                                   |
| Secondary Subject Heading:      | Respiratory medicine                                                                                                                                                                                                                                                                                                                                                                                                                                                                                                                                                                                                                                                                                                                                                                                                                                                                                                                                                                                                                                                                                                                                                                                                                                                                                                                                                                                                                                                                                   |
| Keywords:                       | Protocols & guidelines < HEALTH SERVICES ADMINISTRATION & MANAGEMENT, Chronic airways disease < THORACIC MEDICINE, Emphysema < THORACIC MEDICINE, Computed tomography < RADIOLOGY & IMAGING                                                                                                                                                                                                                                                                                                                                                                                                                                                                                                                                                                                                                                                                                                                                                                                                                                                                                                                                                                                                                                                                                                                                                                                                                                                                                                            |
|                                 |                                                                                                                                                                                                                                                                                                                                                                                                                                                                                                                                                                                                                                                                                                                                                                                                                                                                                                                                                                                                                                                                                                                                                                                                                                                                                                                                                                                                                                                                                                        |

1  
2  
3  
4  
5  
6  
7  
8  
9  
10  
11  
12  
13  
14  
15  
16  
17  
18  
19  
20  
21  
22  
23  
24  
25  
26  
27  
28  
29  
30  
31  
32  
33  
34  
35  
36  
37  
38  
39  
40  
41  
42  
43  
44  
45  
46  
47  
48  
49  
50  
51  
52  
53  
54  
55  
56  
57  
58  
59  
60



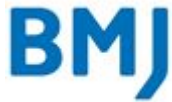

I, the Submitting Author has the right to grant and does grant on behalf of all authors of the Work (as defined in the below author licence), an exclusive licence and/or a non-exclusive licence for contributions from authors who are: i) UK Crown employees; ii) where BMJ has agreed a CC-BY licence shall apply, and/or iii) in accordance with the terms applicable for US Federal Government officers or employees acting as part of their official duties; on a worldwide, perpetual, irrevocable, royalty-free basis to BMJ Publishing Group Ltd ("BMJ") its licensees and where the relevant Journal is co-owned by BMJ to the co-owners of the Journal, to publish the Work in this journal and any other BMJ products and to exploit all rights, as set out in our [licence](#).

The Submitting Author accepts and understands that any supply made under these terms is made by BMJ to the Submitting Author unless you are acting as an employee on behalf of your employer or a postgraduate student of an affiliated institution which is paying any applicable article publishing charge ("APC") for Open Access articles. Where the Submitting Author wishes to make the Work available on an Open Access basis (and intends to pay the relevant APC), the terms of reuse of such Open Access shall be governed by a Creative Commons licence – details of these licences and which [Creative Commons](#) licence will apply to this Work are set out in our licence referred to above.

Other than as permitted in any relevant BMJ Author's Self Archiving Policies, I confirm this Work has not been accepted for publication elsewhere, is not being considered for publication elsewhere and does not duplicate material already published. I confirm all authors consent to publication of this Work and authorise the granting of this licence.



1  
2  
3 **FOOTPRINTS® study protocol: rationale and methodology of a 3-year**  
4  
5 **longitudinal observational study to phenotype patients with COPD**  
6  
7

8 James Crapo,<sup>1</sup> Abhya Gupta,<sup>2</sup> David A. Lynch,<sup>3</sup> Jens Vogel-Claussen,<sup>4,5</sup> Henrik  
9 Watz,<sup>6,7</sup> Alice M. Turner,<sup>8</sup> Robert M. Mroz,<sup>9</sup> Wim Janssens,<sup>10</sup> Andrea Ludwig-  
10 Sengpiel,<sup>11</sup> Markus Beck,<sup>12</sup> Bérengère Langellier,<sup>13</sup> Carina Ittrich,<sup>14</sup> Frank Risse,<sup>15</sup>  
11  
12  
13  
14  
15 Claudia Diefenbach<sup>15</sup>  
16

17  
18 <sup>1</sup>Department of Medicine, National Jewish Health, Denver, Colorado, United States;  
19

20  
21 <sup>2</sup>TA Inflammation Med, Boehringer Ingelheim International GmbH, Biberach an der  
22  
23 Riss, Germany;  
24

25  
26 <sup>3</sup>Department of Radiology, National Jewish Health, Denver, Colorado, United States;  
27

28  
29 <sup>4</sup>Diagnostic and Interventional Radiology, Hannover Medical School, Hannover,  
30  
31 Germany;  
32

33  
34 <sup>5</sup>Biomedical research in endstage and obstructive lung disease Hannover  
35  
36 (BREATH), German Center for Lung Research (DZL), Hannover, Germany;  
37

38  
39 <sup>6</sup>Pulmonary Research Institute at LungClinic Grosshansdorf, Grosshansdorf,  
40  
41 Germany;  
42

43  
44 <sup>7</sup>Airway Research Center North (ARCN), German Center for Lung Research (DZL),  
45  
46 Grosshansdorf, Germany;  
47

48  
49 <sup>8</sup>Institute of Applied Health Research, University of Birmingham, Birmingham, UK;  
50

51  
52 <sup>9</sup>2<sup>nd</sup> Department of Lung Diseases and Tuberculosis, Bialystok Medical University,  
53  
54 Bialystok, Poland;  
55  
56  
57  
58  
59  
60

1  
2  
3 <sup>10</sup>Department of Chronic Diseases, Metabolism and Ageing (CHROMETA),  
4  
5 Laboratory of Respiratory Diseases and Thoracic Surgery (BREATHE), University  
6  
7 Hospital Leuven, KU Leuven, Belgium;  
8  
9

10  
11 <sup>11</sup>KLB Gesundheitsforschung Lübeck GmbH, Lübeck, Germany;  
12

13  
14 <sup>12</sup>Clinical Research, Boehringer Ingelheim Pharma GmbH & Co. KG, Biberach an  
15  
16 der Riss, Germany;  
17

18  
19 <sup>13</sup>Medical Affairs, Boehringer Ingelheim France SAS, Paris, France;  
20

21  
22 <sup>14</sup>Global Department of Biostatistics and Data Sciences, Boehringer Ingelheim  
23  
24 Pharma GmbH & Co. KG, Biberach an der Riss, Germany;  
25  
26

27  
28 <sup>15</sup>Translational Medicine and Clinical Pharmacology, Boehringer Ingelheim Pharma  
29  
30 GmbH & Co. KG, Biberach an der Riss, Germany  
31

32  
33  
34  
35 **Corresponding author:** James Crapo, National Jewish Health, 1400 Jackson  
36  
37 Street, K701, Denver, Colorado, United States  
38

39  
40  
41 Email: [crapoj@njhealth.org](mailto:crapoj@njhealth.org)  
42

43  
44 **Short title:** Emphysema progression biomarker study  
45

46  
47 **Keywords:** Protocols & guidelines, chronic airways disease, emphysema, computed  
48  
49 tomography  
50

51  
52 **Word count:** 4365/4000  
53  
54  
55  
56  
57  
58  
59  
60

## ABSTRACT

### Introduction

A better understanding is needed of the different phenotypes that exist for patients with chronic obstructive pulmonary disease (COPD), their relationship with the pathogenesis of COPD, and how they may affect disease progression. Biomarkers, including those associated with emphysema, may assist in characterising patients and in predicting and monitoring the course of disease. The FOOTPRINTS® study (Study 352.2069; NCT02719184) aims to identify biomarkers associated with emphysema, over a 3-year period.

### Methods and analysis

The FOOTPRINTS® study is a prospective, longitudinal, multinational (12 countries), multicentre (51 sites) biomarker study, which has enrolled a total of 463 ex-smokers, including subjects without airflow limitation (as defined by the 2015 Global Initiative for Chronic Obstructive Lung Disease [GOLD] strategy report), patients with COPD across the GOLD stages 1 to 3, and patients with COPD and alpha1-antitrypsin deficiency. The study has an observational period lasting 156 weeks that includes seven site visits and additional phone interviews. Biomarkers in blood and sputum, imaging data (computed tomography and magnetic resonance), clinical parameters, medical events of special interest and safety are being assessed at regular visits. Disease progression based on biomarker values and COPD phenotypes are being assessed using multivariate statistical prediction models.

## Ethics and dissemination

The study protocol was approved by the authorities and ethics committees/institutional review boards of the respective institutions where applicable, which included study sites in Belgium, Canada, Denmark, Finland, Germany, Japan, Korea, Poland, Spain, Sweden, United Kingdom and the United States; written informed consent has been obtained from all study participants. Ethics committee approval was obtained for all participating sites prior to enrolment of the study participants. The study results will be reported in peer-reviewed publications.

## Trial registration number

NCT02719184.

## Strengths and limitations of this study

- The study helps to address an unmet need to understand different COPD phenotypes, and to expand on our understanding of biomarkers that are associated with emphysema, and hence COPD, in a 3-year longitudinal setting.
- A subset of patients with alpha1-antitrypsin deficiency provides information on an important but rarely studied subpopulation of patients that present with earlier onset and faster progression of emphysema.
- A regular sampling schedule is employed, with frequent visits and biomarker sample collections to allow early detection of changes, if present.
- Magnetic resonance imaging and sputum collection only occur at certain study sites, and not necessarily at all planned times; hence, the smaller subsets of patients may not be representative of the entire population.

- Patients with the newly defined PRISm phenotype are not included, nor are current smokers or healthy subjects who have never smoked, thus limiting the control groups for reference.

## INTRODUCTION

Airflow limitation is a key characteristic of chronic obstructive pulmonary disease (COPD).[1,2] It is caused by small airways disease, such as obstructive bronchiolitis, and structural changes related to parenchymal destruction (emphysema).[1,2] Small airways disease and structural changes can occur alone or in combination with one another, with the degree of severity and relative contributions varying between individuals.[1]

COPD is associated with inflammation and tissue damage, which is thought to be linked to – among other aspects – an imbalance between neutrophil serine proteases (NSPs) and their inhibitors.[3,4] The serine protease inhibitor alpha1-antitrypsin (A1AT) inactivates NSPs such as neutrophil elastase (NE), proteinase 3 (PR3) and cathepsin G (Cat G), to protect lung tissue against protease-mediated damage.[5,6] Although a number of gene defects have been associated with emphysema,[7] A1AT deficiency (A1ATD) is the most well established as a cause for COPD.[8] It is associated with a higher risk of developing emphysema that tends to occur at a younger age and progresses faster than for patients without A1ATD.[5,9,10] Subjects with the most severe A1ATD are usually homozygous for the ZZ allele (ZZ).[5] The resulting emphysema among patients with A1ATD is thought to be caused primarily by increased NSP activity in the lungs.[10]

1  
2  
3 NE and PR3 are responsible for the degradation of critical components of the  
4 extracellular matrix, including elastin and fibronectin, and can produce other key  
5 features of COPD, such as mucous hypersecretion.[3] When quantified, levels of NE,  
6 PR3 or their specific elastin degradation products have been associated with poorer  
7 disease outcomes in patients with COPD, such as incidence of exacerbations and  
8 higher risk of mortality.[11-13] Other proteases and biomarkers, including  
9 desmosine, fibrinogen and C-reactive protein, have also been associated with poorer  
10 disease outcomes in patients with COPD.[13-15]

11  
12 In the era of precision-based patient care, there is a need for a more in-depth  
13 understanding of COPD patient phenotypes, pathogenesis and progression.[16,17]  
14 Biomarkers may assist in characterising patients, and in predicting and monitoring  
15 the course of disease, in order to better enable the development of drugs aimed at  
16 slowing COPD progression.[16-18] In fact, there are encouraging signs that  
17 therapies that modify NSP imbalance (e.g. augmentation therapy for A1ATD) appear  
18 to alter emphysema progression, at least when considering blood and radiological  
19 biomarkers of disease.[19,20] Since quantitative computed tomography (CT) is a  
20 well-established method for documenting the presence, extent and progression of  
21 emphysema, it is potentially useful for assessing these emerging biomarkers.[21-24]

22  
23 This prospective, longitudinal study is investigating biomarkers in different biofluids  
24 (whole blood, serum, plasma and induced sputum), imaging parameters assessed  
25 by CT and magnetic resonance imaging (MRI), as well as clinical parameters  
26 potentially associated with emphysema, over a 3-year period. It is hoped that  
27 correlation of lung destruction biomarkers with CT densitometry findings should  
28 increase our understanding of the underlying pathophysiology of emphysema

1  
2  
3 progression. The insights generated may support the development of future  
4  
5 treatments that could slow or halt disease progression in patients with COPD. Here  
6  
7 we report the methodology of the FOOTPRINTS® study, as described in the study  
8  
9 protocol (version 5.0; date: 29 May 2018).  
10  
11  
12

### 13 **Objectives**

14  
15  
16 The primary objective of this longitudinal study is to explore whether any of the  
17  
18 biomarkers assessed in patients with COPD, patients with COPD plus A1ATD and  
19  
20 subjects without airflow limitation (controls; as defined by the 2015 Global Initiative  
21  
22 for Chronic Obstructive Lung Disease [GOLD] strategy report),[25] or specific  
23  
24 patterns thereof, are correlated with COPD progression, particularly emphysema  
25  
26 progression, over 156 weeks.  
27  
28

29  
30 Further objectives, to be assessed over 156 weeks, include:  
31  
32

- 33 • To assess the correlation of soluble biomarkers of inflammation and lung tissue  
34  
35 destruction with COPD severity, presence of emphysema and disease  
36  
37 progression.  
38  
39
- 40 • To determine the concentration and activity of proteases in induced sputum, and  
41  
42 to assess potential biomarkers of lung tissue destruction in sputum and blood,  
43  
44 from patients with different severities of COPD (including a subset of patients with  
45  
46 A1ATD) and subjects without airflow limitation (controls).  
47  
48
- 49 • To assess the correlation of physiological biomarkers and functional imaging  
50  
51 biomarkers with COPD severity, the presence of emphysema and disease  
52  
53 progression, and to evaluate MRI-based imaging biomarkers with respect to their  
54  
55 feasibility.  
56  
57  
58  
59  
60

- To identify COPD phenotypes and define their risk for, and rate of, disease progression.

## METHODS AND ANALYSIS

### Study design

The FOOTPRINTS study<sup>®</sup> (registered on 21 March 2016) is a multinational, prospective, longitudinal, biomarker study in subjects without airflow limitation, patients with COPD, and patients with COPD and A1ATD, taking place at 51 sites across 12 countries (Belgium, Canada, Denmark, Finland, Germany, Japan, Korea, Poland, Spain, Sweden, United Kingdom, and the United States). A complete list of study sites is detailed in Supplementary File 1 (table 1).

The study consists of two consecutive periods (a screening period lasting up to 28-days and an observational period lasting 156 weeks) and includes seven site visits and additional phone interviews (figure 1). The observational period is completed at Visit 7 or at the discontinuation visit, which is regarded as study completion. Patients are considered to be in the observational phase only after completing Visit 2. All subjects who prematurely discontinue the study during the observational phase are followed for vital status and COPD exacerbation status (for patients with COPD and for patients with COPD and A1ATD only) via phone contact until 156 weeks after Visit 2.

Calculation of sample size, and power calculations for annual decline in forced expiratory volume in 1 second and 15th percentile density assessed by CT, are provided in Supplementary File 1 (text 1 and tables 2 and 3).



### Inclusion and exclusion criteria

Male and female participants who have signed an informed consent form consistent with the International Conference on Harmonisation Good Clinical Practice (GCP) guidelines prior to participation have been included, provided the following were applicable:

- Aged 40–70 years (30–70 years for patients with COPD and A1ATD).
- Ex-smokers for  $\geq 9$  months with a smoking history of  $\geq 20$  pack-years ( $\geq 10$  pack-years for patients with COPD and A1ATD).
- Body mass index (BMI) 18–35 kg/m<sup>2</sup> ( $\leq 30$  kg/m<sup>2</sup> in the MRI subset).
- Able to perform all study-related procedures.
- Required to have been on stable therapy for 4 weeks prior to Visit 1.

Participants were excluded if any of the following were applicable:

- Significant pulmonary disease (other than COPD) or other significant medical condition, for example, rheumatoid arthritis, severe liver disease or psoriasis.
- Documented history of asthma, including during childhood.
- Any respiratory tract infection or COPD exacerbation within 4 weeks prior to Visit 1 or during the screening period prior to Visit 2, if it was not possible to meet the rescheduling rules.
- Presence of an immunocompromising condition (e.g. HIV or history of hepatitis B or C).
- Any treatment with phosphodiesterase-4 inhibitors and maintenance treatment with methylxanthines within 3 months or 6 half-lives prior to Visit 1, and until Visit 2; patients were permitted to initiate treatment following Visit 2.

- Patients with COPD (with and without A1ATD) with newly added anti-inflammatory treatment (either respiratory or non-respiratory) or change in any therapy within 4 weeks prior to Visit 1 and during the screening period between Visit 1 and Visit 2; patients were permitted to initiate treatment following Visit 2.
- Any prior, current or planned A1AT augmentation therapy.
- Permitted and restricted medications and therapy are detailed in Supplementary File 1 (table 4).
- Pregnant or lactating females.
- Previous participation in this study or participation in a parallel interventional clinical trial within 6 weeks prior to Visit 1 or during the study.

### **Patient population and recruitment**

The study is ongoing; however, enrolment is complete. In total, 463 patients were enrolled, who are described in more detail in table 1. Strategies for achieving adequate participant enrolment and retainment are described in Supplementary File 1 (text 1).

The study started on 22 July 2016 when the first subject was screened, and the planned end date for the study is 29 March 2021.

**Table 1. FOOTPRINTS® study participants: all enrolled subjects**

| Patient group                                                                                                                                                                                                                              | Rationale                                                                                                                                                                                                                                                                                                                                                                                                 |
|--------------------------------------------------------------------------------------------------------------------------------------------------------------------------------------------------------------------------------------------|-----------------------------------------------------------------------------------------------------------------------------------------------------------------------------------------------------------------------------------------------------------------------------------------------------------------------------------------------------------------------------------------------------------|
| 383 patients with COPD, including: <ul style="list-style-type: none"> <li>• 123 patients with mild COPD<sup>a</sup></li> <li>• 130 patients with moderate COPD<sup>b</sup></li> <li>• 130 patients with severe COPD<sup>c</sup></li> </ul> | Included to provide data on increased lung protease levels and the contribution that this may have on the development and progression of emphysema in the absence of A1ATD.                                                                                                                                                                                                                               |
| 18 patients with COPD and A1ATD <sup>d</sup>                                                                                                                                                                                               | Included as they present with an earlier onset of emphysema and a faster decline in lung function, as well as a faster change in lung density.[9]                                                                                                                                                                                                                                                         |
| 62 ex-smokers without airflow limitation                                                                                                                                                                                                   | Included to provide a comparison for biomarkers between subjects with and without airflow limitation. Subjects were required to be healthy based on a complete medical history and to have:<br>FEV <sub>1</sub> ≥80% of predicted normal and post-bronchodilator.<br>FEV <sub>1</sub> /forced vital capacity ≥lower limit of normal.<br>A mean post DL <sub>CO</sub> ≥70% of predicted normal at Visit 1. |
| <b>Total enrolled: 463 subjects</b>                                                                                                                                                                                                        |                                                                                                                                                                                                                                                                                                                                                                                                           |

<sup>a</sup>Defined as GOLD stage 1, FEV<sub>1</sub> ≥80% predicted [25]; <sup>b</sup>defined as GOLD stage 2, FEV<sub>1</sub> ≥50–<80% predicted [25]; <sup>c</sup>defined as GOLD stage 3, FEV<sub>1</sub> ≥30–<50% predicted [25]; <sup>d</sup>defined as having a diagnosis of COPD and a documented A1ATD of ZZ genotype prior to Visit 2.

A1ATD, alpha1-antitrypsin deficiency; COPD, chronic obstructive pulmonary disease; DL<sub>CO</sub>, diffusing capacity of the lungs for carbon monoxide; FEV<sub>1</sub>, forced expiratory volume in 1 second; GOLD, Global Initiative for Chronic Obstructive Lung Disease.

## Main outcome measures

The main outcome measures are change in lung density (assessed by CT), lung function decline and number, duration and severity of exacerbations over the course of the study.

## Planned analyses and assessments

Variables to be analysed include a range of soluble biomarkers, imaging biomarkers and clinical parameters, as well as medical events of special interest (MESI) and safety assessments. The pre-specified biomarkers being assessed are summarised in table 2, and the biomarker sampling schedule and overall trial design are illustrated in figure 1.

**Table 2. Summary of biomarker assessments**

| Variables                               | Biomarker assessment                                                                                                                                                                                                                                                                                                                                                                                                                                                                                           |
|-----------------------------------------|----------------------------------------------------------------------------------------------------------------------------------------------------------------------------------------------------------------------------------------------------------------------------------------------------------------------------------------------------------------------------------------------------------------------------------------------------------------------------------------------------------------|
| <b>Pre-specified soluble biomarkers</b> |                                                                                                                                                                                                                                                                                                                                                                                                                                                                                                                |
| <b>Blood</b>                            | <ul style="list-style-type: none"> <li>• Total and differential cell counts</li> <li>• DNA analyses (to determine A1AT genotype)</li> </ul>                                                                                                                                                                                                                                                                                                                                                                    |
| <b>Induced sputum*</b>                  | <ul style="list-style-type: none"> <li>• Neutrophil elastase activity</li> <li>• Proteinase 3 activity</li> <li>• Cat-G activity</li> </ul>                                                                                                                                                                                                                                                                                                                                                                    |
| <b>Serum/plasma</b>                     | <ul style="list-style-type: none"> <li>• Tissue turnover biomarkers (including neutrophil elastase-specific elastin fragment)</li> <li>• Other protease-generated neoepitopes (including Cat-S cleaved decorin)</li> <li>• Soluble form of receptor for advanced glycation end products</li> <li>• Surfactant protein D</li> <li>• Lysyl oxidase like 2</li> <li>• Biomarkers of systemic inflammation (including IL-6, high-sensitivity C-reactive protein, white blood cell count and fibrinogen)</li> </ul> |
| <b>Imaging biomarkers</b>               |                                                                                                                                                                                                                                                                                                                                                                                                                                                                                                                |
| <b>CT scanning</b>                      | <ul style="list-style-type: none"> <li>• Airway morphology               <ul style="list-style-type: none"> <li>○ Mean lumen diameter</li> <li>○ % wall area</li> </ul> </li> </ul>                                                                                                                                                                                                                                                                                                                            |

|                                        |                                                                                                                                                                                                                                                                                                                                                                                                                                                                                                                                                                                                                                                                                                                                                                                               |
|----------------------------------------|-----------------------------------------------------------------------------------------------------------------------------------------------------------------------------------------------------------------------------------------------------------------------------------------------------------------------------------------------------------------------------------------------------------------------------------------------------------------------------------------------------------------------------------------------------------------------------------------------------------------------------------------------------------------------------------------------------------------------------------------------------------------------------------------------|
|                                        | <ul style="list-style-type: none"> <li>○ Mean segmental and sub-segmental airway wall thickness</li> <li>○ Square root of wall area of bronchus with internal perimeter of 10 mm (pi10)</li> <li>● Emphysema (on inspiratory CT) <ul style="list-style-type: none"> <li>○ PD15 of the CT histogram</li> <li>○ PD15 adjusted for inspired lung volume</li> <li>○ % lung voxels with attenuation <math>\leq -950</math> HU (LAA-950)</li> </ul> </li> <li>● Air trapping (on expiratory CT) <ul style="list-style-type: none"> <li>○ % lung voxels with attenuation <math>\leq -856</math> HU (LAA-856)</li> </ul> </li> <li>● Registration-based parenchyma measurements <ul style="list-style-type: none"> <li>○ % normal lung, % emphysema and % small airway disease</li> </ul> </li> </ul> |
| <b>MRI</b>                             | <ul style="list-style-type: none"> <li>● Conducted at 1.5 Tesla in a subset of subjects without airflow limitation and in patients with COPD and without A1ATD to assess functional lung parameters, including pulmonary blood flow</li> </ul>                                                                                                                                                                                                                                                                                                                                                                                                                                                                                                                                                |
| <b>Clinical parameters/assessments</b> | <ul style="list-style-type: none"> <li>● Spirometry to assess FEV<sub>1</sub> and FVC</li> <li>● DL<sub>CO</sub> and DL<sub>CO</sub> per unit of alveolar volume</li> <li>● Body plethysmography (functional residual capacity, total lung capacity, inspiratory capacity, inspiratory vital capacity, residual volume, expiratory reserve volume)</li> <li>● Pulse oximetry</li> <li>● Symptom questionnaires (modified Medical Research Council Dyspnoea Scale, COPD Assessment Test, St. George's Respiratory Questionnaire)</li> <li>● 6-minute walk test</li> <li>● Body mass index and BODE index</li> <li>● Adverse events and MESI</li> </ul>                                                                                                                                         |

\*Collected at selected sites.

A1AT, alpha1-antitrypsin; A1ATD, alpha1-antitrypsin deficiency; Cat, cathepsin; COPD, chronic obstructive pulmonary disease; CT, computed tomography; DL<sub>CO</sub>, diffusing capacity of the lungs for carbon monoxide; FEV<sub>1</sub>, forced expiratory volume in 1 second; FVC, forced vital capacity; HU, Hounsfield Units; IL-6, interleukin-6; LAA, low attenuation areas; MESI, medical events of special interest; MRI, magnetic resonance imaging; PD15, lung density at the 15<sup>th</sup> percentile point of the CT histogram.

Blood and sputum are being collected at Visits 2–7 for analysis of pre-specified soluble biomarkers, and blood is also being collected at Visit 1 to perform a genetic

1  
2  
3 test for A1ATD (figure 1). Total and differential cell counts in blood, which are being  
4 assessed within the safety laboratory assessments, are also being assessed as  
5 biomarkers. Sputum will be induced to generate sputum samples, including cell  
6 slides to assess total and differential cell count and supernatant to assess soluble  
7 biomarker levels (table 2).  
8  
9

10  
11  
12  
13  
14  
15 Chest CT scans are being conducted annually at Visits 2, 5, 6 and 7, following a  
16 specific low-dose protocol in order to minimise radiation exposure at each visit. A  
17 COPDGene® phantom [26] is being used before the first patient scan and then bi-  
18 monthly to monitor the stability of CT measurements for each scanner. MRI  
19 evaluation of the pulmonary vasculature and right ventricle is conducted in a subset  
20 of patients without airflow limitation and patients with COPD (not in patients with  
21 COPD and A1ATD) at Visits 2, 4, 5, 6 and 7. MESI include respiratory disorders  
22 such as pneumonia, pulmonary fibrosis, bronchiectasis and COPD exacerbations, as  
23 well as any other disorders (e.g. cardiovascular, metabolic/digestive and  
24 neurological/psychiatric) reported at the investigator's discretion. COPD  
25 exacerbations are defined as new or increased lower respiratory events or  
26 symptoms related to the underlying COPD with duration  $\geq 3$  days. Assessment of  
27 safety is carried out at Visits 1, 5, 6 and 7 unless otherwise indicated, including  
28 physical examination (plus assessment of height [Visit 1 only] and weight), vital signs  
29 (blood pressure and pulse rate), safety laboratory parameters (from blood; assessed  
30 at every site visit [Visits 1–7]) and electrocardiogram. Adverse events associated  
31 with any study procedure and MESI are collected at every site visit (Visits 1–7; MESI  
32 also assessed via telephone contact between visits; figure 1). All adverse events are  
33 followed up until they have resolved, been sufficiently characterised, or no further  
34 information can be obtained.  
35  
36  
37  
38  
39  
40  
41  
42  
43  
44  
45  
46  
47  
48  
49  
50  
51  
52  
53  
54  
55  
56  
57  
58  
59  
60

### **Rescheduling of clinic visits**

Any deviations from the planned visit schedule are being documented. Rescheduling of certain clinic visits was permitted to promote participant retention. Clinic visits that involve a lung function test may be rescheduled twice within the permitted time windows due to violation of lifestyle restrictions. Subjects should refrain from strenuous activity for at least 12 hours prior to lung function testing (and throughout the testing period); and should avoid cold temperatures, environmental smoke, dust or areas with strong odours (e.g. perfumes). Sputum induction at Visit 2 can be rescheduled by up to 3 days; at all subsequent visits, it should not be repeated if the subject is unable to produce sputum or if the sputum sample quality is not acceptable. If chest CT and MRI (where applicable) cannot be performed on the day of the scheduled visit, the imaging assessment can be rescheduled up to 14 days after the visit. If a patient experiences a COPD exacerbation or respiratory tract infection during the screening period, Visit 2 will be postponed until 4 weeks following recovery from the exacerbation or infection, and the screening period may be extended up to 8 weeks.

### **Statistical analysis**

Biomarker assessments and clinical outcomes measures are evaluated by regression models for repeated measures using respective point estimates and CI estimates. The correlation between individual biomarkers, and between biomarkers and other clinical outcome measures, is being assessed. Multivariate statistical prediction models for disease progression based on biomarker values and COPD phenotypes are being developed and examined. Interim analyses will also be conducted by the trial team once data from the 52-week and 104-week assessments

1  
2  
3 are available for  $\geq 70\%$  of subjects entered into the study. The purpose of this is to  
4  
5 provide information on the use of MRI and soluble biomarker assessments.  
6  
7

### 8 **Information on steering committee**

10  
11 A scientific steering committee, Emphysema Progression Biomarker Study  
12  
13 (FOOTPRINTS® study) Steering Committee, was established in January 2017 to  
14  
15 discuss and evaluate key scientific data in the field of respiratory medicine, and to  
16  
17 provide independent advice and recommendations to optimise and strengthen the  
18  
19 FOOTPRINTS® biomarker study. The steering committee comprises 13 external and  
20  
21 internal scientific experts in respiratory medicine and chest radiology (Supplementary  
22  
23 File 1; table 5), and is conducted in adherence to industry regulations on the  
24  
25 cooperation of the pharmaceutical industry with the medical professions.[27-29]  
26  
27  
28  
29

### 30 **Data collection and management**

32  
33 An interactive response technology system was used to track subject enrolment, and  
34  
35 to register clinic visits and phone calls. A central laboratory facility is handling all  
36  
37 standard safety blood laboratory analyses. Spirometry is performed using an  
38  
39 external vendor's equipment to allow for centralised readings. Electrocardiograms  
40  
41 are recorded for about a 10-second duration after the subject has rested for at least  
42  
43 5 minutes in a supine position, with electrode placement performed according to the  
44  
45 Wilson method (precordial leads) and Goldberger and Einthoven (limb leads). Pulse  
46  
47 oximetry will be performed to measure oxygen saturation; all recordings will be made  
48  
49 using the same pulse oximetry measurement device per site on the same finger of  
50  
51 the subject. Body plethysmography,  $DL_{CO}$ , the 6-minute walk test (6MWT) and  
52  
53 sputum induction and processing (at selected sites only) are performed according to  
54  
55 international accepted guidelines as follows. Body plethysmography and  $DL_{CO}$   
56  
57  
58  
59  
60



1  
2  
3 measurement are being performed according to American Thoracic  
4 Society/European Respiratory Society guidelines, after salbutamol  
5 administration.[30] The 6MWT is being conducted according to ATS guidelines.[31]  
6  
7 Inspiratory and expiratory CT scans are being performed according to the  
8 specifications provided in Supplementary File 1 (table 6). Sputum induction and  
9 processing are performed according to the sputum manual issued by the vendor for  
10 sputum assessment and analysis.  
11  
12

13  
14 All samples collected for pre-specified biomarker assessments are prepared by the  
15 site according to instructions given in the investigator site file until shipment to the  
16 central contract research organisation. Additional blood samples (whole blood,  
17 plasma and serum) will be taken at Visits 2 to 7 for future unspecified analyses, while  
18 potential leftovers from pre-specified blood analysis and induced sputum will also be  
19 stored and used for this purpose; these samples will be stored for up to 15 years  
20 after the final study report has been signed. Biomarkers are analysed by the sponsor  
21 or contractors of the sponsor. Data management and statistical evaluation are  
22 conducted by the sponsor or contractors of the sponsor. Source documents are filed  
23 at the investigator's site; these data are transferred to the electronic case report  
24 form. Missing data may be imputed if necessary.  
25  
26

27  
28 A clinical trial monitor, appointed by the sponsor, ensures the good running of the  
29 study and directs the clinical study team in the preparation, conduct, and reporting of  
30 the study, in accordance with the sponsor's standardised operating procedures, GCP  
31 guidelines, and current legislation.  
32  
33

34  
35 Medical information obtained for individual subjects during the study is considered  
36 confidential and this will be ensured by using subject identification code numbers.  
37  
38  
39  
40  
41  
42  
43  
44  
45  
46  
47  
48  
49  
50  
51  
52  
53  
54  
55  
56  
57  
58  
59  
60

1  
2  
3 Further information on confidentiality is detailed in the informed consent form  
4  
5 (Supplementary File 2).  
6  
7

## 8 **Patient and public involvement**

9

10  
11 Patients or the public were not involved in the design, conduct, reporting or  
12  
13 dissemination plans of our research.  
14  
15

## 16 **ETHICS AND DISSEMINATION**

17

18  
19 This study is being performed in accordance with the International Conference on  
20  
21 Harmonisation Tripartite Guideline for GCP, the Japanese GCP regulations and local  
22  
23 regulations. The study protocol has received approvals from the following IEC/IRBs:  
24  
25

26 **Belgium:** Ethische commissie onderzoek UZ / KU Leuven; **Canada:** Hamilton  
27

28 Integrated Research Ethics Board, Ontario; Research Ethics Board University of  
29

30 Cardiology and Pneumology Institute of Quebec; Health Research Ethics Board,  
31

32 University of Alberta; University of Saskatchewan Biomedical Research Ethics  
33

34 Board; **Denmark:** De Videnskabetiske Komitéer for Region Hovedstaden, Hillerød;  
35  
36

37 **Finland:** Varsinais-Suomen sairaanhoitopiiri Eettinen toimikunta; **Germany:**  
38

39 Ethikkommission Landesärztekammer Hessen, Frankfurt; Ethikkommission  
40  
41

42 Schleswig-Holstein, Bad Segeberg; Ethikkommission der Medizinischen Hochschule  
43  
44

45 Hannover, Hannover; **Japan:** The IRB of Osaka City University Hospital, Osaka; The  
46

47 IRB of Kishiwada City Hospital, Kishiwada; The IRB of Showa University Hospital,  
48  
49

50 Shinagawa; The IRB of Kagoshima University Hospital, Kagoshima; The IRB of  
51

52 Showa University Hospital, Shinagawa; **Republic of Korea:** The Catholic University  
53

54 of Korea, Eunpyeong St. Mary's Hospital IRB, Seoul; Seoul Metropolitan  
55

56 Government Seoul National University Boramae Medical; Korea University Guro  
57

58 Hospital IRB, Seoul; Konkuk University Medical Center IRB, Seoul; **Poland:**  
59  
60

1  
2  
3 Bioethics Committee at Regional Medical Chamber, Bialystok; **Spain:** CEIm Hospital  
4 Clínic, Barcelona; CEIC Illes Balears, Palma; CEIC Hospital Universitari Vall Hebrón,  
5  
6 Barcelona; CEIC-Parc de Salut Mar, Barcelona; CEIC – Hospital de Bellvitge,  
7  
8 Barcelona; **Sweden:** Regionala etikprövningsnämnden i Lund, Lund; **United**  
9  
10 **Kingdom:** North West – Greater Manchester East Research Ethics Committee;  
11  
12 **United States:** University of Alabama at Birmingham Western Institutional Review  
13  
14 Board, Puyallup; Baylor College of Medicine Institutional Review Board for Baylor,  
15  
16 Houston; University of California San Diego UCSD Human Research Protection  
17  
18 Program, La Jolla; Temple University Hospital Western Institutional Review Board  
19  
20 (WIRB), Puyallup; University of Utah Health Sciences Center University of Utah IRB,  
21  
22 Salt Lake City; University of California Los Angeles Western Institutional Review  
23  
24 Board, Puyallup; Chesapeake IRB, Columbia; Advarra, Inc., Columbia; University of  
25  
26 Iowa Human Subjects Office/Institutional Review Board, Iowa City; Johns Hopkins  
27  
28 Institutional Review Board Reed Hall - B 130, Baltimore; National Jewish Health  
29  
30 Western Institutional Review Board, Puyallup.

31  
32  
33 In the respective countries, the ethics approval preceded the study participant's  
34  
35 enrolment. Written informed consent is obtained from all study participants. Notably,  
36  
37 any protocol amendments will be initiated only after all required legal documentation  
38  
39 has been reviewed and/or approved by the respective IRB/IEC, as applicable.

40  
41  
42 The study findings will be reported in due course at research conferences and in  
43  
44 peer-reviewed journals. The study protocol and clinical study data will be available to  
45  
46 be shared after publication of the primary manuscript in a peer-reviewed journal.

47  
48  
49 These data will be available upon reasonable request; further details will be provided  
50  
51  
52 in the primary manuscript.

## DISCUSSION

COPD is characterised by progressive airflow limitation and a decline in lung function. It has also been demonstrated that emphysema, a major cause of airflow limitation in COPD, is independently associated with a rapid decline in lung function.[32,33] Current pharmacological treatment options for COPD and emphysema do not prevent the progressive decline of FEV<sub>1</sub> – the most commonly used marker of disease severity and progression in COPD.[1,34,35] However, FEV<sub>1</sub> is poorly correlated with symptoms and some other measures of disease progression.[1,36]

The heterogeneity of COPD extends to a molecular level, a concept familiar in asthma, where endotype-directed therapy is now well accepted;[37] hence there is a need for biomarkers that can assist with diagnosis, risk stratification and assessment of therapeutic interventions.[38,39] A recent systematic review by Fermont *et al.* reported that biomarkers and clinical parameters including 6MWT, fibrinogen, C-reactive protein, white cell count and interleukin-6, are associated with clinical outcomes in COPD and worth further investigation.[14] A systematic review of CT density as a radiological biomarker came to similar conclusions.[40] It is anticipated that biomarkers may facilitate a better understanding of the prognosis of COPD, help to guide treatment options and allow for a greater degree of precision medicine as treatment options.[38]

So far, few studies have addressed the potential of biomarkers to predict the longitudinal outcomes of COPD, and this has been assessed for a limited number of biomarkers only. The COPDGene<sup>®</sup> study, which has enrolled over 10,000 smoking (with or without COPD) and non-smoking subjects, is predominantly focused on

1  
2  
3 identifying genetic determinants for COPD susceptibility,[41] while the UK-based  
4 British Lung Foundation early COPD study is currently enrolling smokers with normal  
5 lung function or mild lung function abnormalities to assess the very early stages of  
6 COPD development.[42] The Evaluation of COPD Longitudinally to Identify  
7 Predictive Surrogate End-points (ECLIPSE) study [43] and the Subpopulations and  
8 Intermediate Outcomes in COPD Study (SPIROMICS) [44] have enrolled subjects  
9 with COPD and smoking/non-smoking control subjects, similar to the COPDGene®  
10 study. Other longitudinal studies include the German COPD and SYstemic  
11 consequences-COmorbidities NETwork (COSYCONET) study [45] and the Canadian  
12 Cohort Obstructive Lung Disease (CanCOLD) study.[46] All of these studies plan to  
13 analyse a range of soluble biomarkers and clinical outcomes, and conduct CT  
14 imaging to help identify COPD phenotypes.[42-48]

15  
16  
17 This prospective, longitudinal study was designed to investigate, over a 3-year  
18 period, biomarkers in different biofluids, imaging biomarkers and clinical parameters  
19 that may be associated with emphysema. A key strength of the FOOTPRINTS®  
20 study is that it actively recruited a subset of patients with A1ATD. This is an  
21 important but rarely studied subpopulation of patients, which has not been actively  
22 recruited for in other longitudinal studies, such as the COPDGene®,[41]  
23 ECLIPSE,[43] SPIROMICS [44] and UK early COPD cohort studies.[48] Patients  
24 with A1ATD present with earlier onset of emphysema, and could help us to better  
25 understand possible markers for emphysema progression, in particular the role of  
26 NSP imbalance conditional upon A1AT levels.[10] While A1ATD is associated with a  
27 higher risk of emphysema and COPD, increased levels of serum A1AT occur in  
28 response to inflammation.[49] Interestingly, increased levels of A1AT have also been  
29 associated with worse outcomes in patients with COPD. A recent analysis of data  
30

1  
2  
3 from the Hokkaido COPD cohort study examined the association of circulating A1AT  
4 levels with the clinical course of COPD patients without A1ATD and reported that  
5  
6 higher A1AT levels were associated with worse outcomes, including more  
7  
8 emphysema, a worse systemic inflammation status and higher 10-year mortality.[49]  
9  
10  
11 Our findings in patients with A1ATD could help us to further understand the complex  
12  
13 relationship between A1AT levels and COPD disease progression.  
14  
15  
16

17  
18 Compared with the COPDGene® study, in which assessments were scheduled at  
19  
20 baseline, 5 years and 10 years (ongoing),[41,47,50] the FOOTPRINTS® study has  
21  
22 more frequent visits and biomarker sample collections, similar to the ECLIPSE[43]  
23  
24 and SPIROMICS [44] studies. In particular, the regular collection of sputum is a  
25  
26 major asset of the FOOTPRINTS® study; sputum collection is scheduled to occur  
27  
28 more frequently than in both the COPDGene® [47] and SPIROMICS [44] studies,  
29  
30 and with a similar frequency to the ECLIPSE [43] study, with four collections  
31  
32 scheduled in the first year of the study, and subsequent collections scheduled at  
33  
34 Year 2 and Year 3. Another key strength and differentiator of the FOOTPRINTS®  
35  
36 study is that annual chest CT scans are being performed; compared to the other  
37  
38 longitudinal studies discussed here, and to the best of our knowledge, the  
39  
40 FOOTPRINTS® study will provide the most regular CT imaging data. This, in addition  
41  
42 to the frequent biomarker sampling, will allow for more robust measures of short- to  
43  
44 medium-term decline, critical for informing clinical trials of emphysema targeted  
45  
46 medicinal products.[43,44] The FOOTPRINTS® study is also assessing a wider  
47  
48 range of non-genetic biomarkers and clinical parameters across the entire study  
49  
50 population compared with the COPDGene® study, which is focused primarily on  
51  
52 genetic analyses of DNA samples.[41,47] For example, the FOOTPRINTS® study is  
53  
54 assessing NE, PR3 and Cat G activity, which could help us to further understand the  
55  
56  
57  
58  
59  
60

1  
2  
3 role of these biomarkers in patients with COPD, including those with A1ATD and  
4 poorer disease prognosis.[10] In addition, FOOTPRINTS® is conducting MRI  
5 assessments, which could be valuable in improving our understanding of changes in  
6 vasculature and perfusion in the lung that may precede changes in emphysema.[51]  
7  
8 Due to the small number of patients included in the subset analysis and the  
9 challenges associated with obtaining meaningful MRI data, these findings are  
10 expected to be limited.  
11  
12

13  
14 Although the FOOTPRINTS® study is not focusing on frequent exacerbators, it is  
15 anticipated that a considerable number of adverse events, medical events of special  
16 interest and hospital admissions will be detected during the 3 years of follow-up. The  
17 wide range of biomarkers measured in sputum and blood may help identify subjects  
18 at risk for such events. In addition, the longitudinal biosampling in FOOTPRINTS®  
19 will offer a unique opportunity to study the impact of exacerbations on the evolution  
20 of pathogenic processes.  
21  
22

23  
24 It is anticipated that the results of the FOOTPRINTS® study will complement, as well  
25 as expand on, the data generated in other longitudinal studies, such as  
26 COPDGene®,[41] ECLIPSE [43] and SPIROMICS.[44] It is envisaged that the results  
27 of this study will increase our understanding of COPD phenotypes and the  
28 underlying pathophysiology of emphysema progression, which may be of use when  
29 developing drugs to reduce COPD advancement. In addition, biomarkers associated  
30 with ongoing emphysematous destruction of lung parenchyma may be identified,  
31 which could assist in predicting and monitoring patients' COPD disease course.  
32  
33

34  
35 A potential limitation of the FOOTPRINTS® study is that sputum collection and MRI  
36 only occur at certain study sites. As such, the smaller subset of subjects may not be  
37  
38  
39  
40  
41  
42  
43  
44  
45  
46  
47  
48  
49  
50  
51  
52  
53  
54  
55  
56  
57  
58  
59  
60

1  
2  
3 sufficiently large to represent the entire population. In addition, there is potential for  
4  
5 selection bias at site and patient levels, as the study is non-randomised and all  
6  
7 participants are required to be ex-smokers. Note that current smokers were not  
8  
9 included because smoking cessation can cause high variability in outcomes,  
10  
11 particularly lung density measurements.[52,53] Given that disease progression  
12  
13 occurs despite smoking cessation, ex-smokers were considered to be a more  
14  
15 appropriate population. A further limitation is that patients with the newly defined  
16  
17 preserved ratio impaired spirometry (PRISm) phenotype [41,54,55] and healthy  
18  
19 subjects who have never smoked are not included.  
20  
21  
22

23  
24 Finally, an inherent challenge in studying biomarker levels in patients with COPD is  
25  
26 the variability in biomarker levels over time. For example, a study by Dickens *et al.*  
27  
28 looked at variability in levels of biomarkers over 3 months in subjects with COPD. At  
29  
30 Month 3, fibrinogen was a highly repeatable biomarker, with levels within 25% of  
31  
32 their baseline values for 89% of study participants, yet only 21% of patients had  
33  
34 levels of C-reactive protein within 25% of baseline values.[39] In the current study,  
35  
36 the lack of a healthy never-smoker control group limits the opportunity to compare  
37  
38 the extent of biomarker fluctuations over time. The reasons for variability over time  
39  
40 are poorly understood, but the repeatability of biomarkers should be considered  
41  
42 when selecting for clinical applications.[39] Therefore, longitudinal assessment of  
43  
44 biomarkers is planned, to help understand the longitudinal stability of  
45  
46 biomarker-based phenotypes.  
47  
48  
49  
50

51  
52 In summary, biomarkers may help to characterise patients with COPD, allow for  
53  
54 better monitoring and prediction of the disease course, and enable an increased  
55  
56 understanding of COPD itself. Subsequently, this should help us to develop drugs to  
57  
58  
59  
60



1  
2  
3 reduce disease progression. The FOOTPRINTS® longitudinal study is investigating  
4 biomarkers in biofluids, imaging biomarkers and clinical parameters associated with  
5 emphysema over a 3-year period, to increase the understanding of COPD patient  
6 phenotypes, pathogenesis and disease progression.  
7  
8  
9  
10  
11  
12  
13  
14  
15

## 16 **ACKNOWLEDGEMENTS**

17  
18 Vicki Cronin, PhD, at MediTech Media provided editorial assistance in the  
19 development of this manuscript, funded by Boehringer Ingelheim, and Harald  
20 Kogler, MD, assisted with reviewing the manuscript. The authors would like to thank  
21 all the patients and healthy volunteers for participating in this trial, and also extend  
22 their thanks to the investigators and study staff.  
23  
24  
25  
26  
27  
28  
29  
30  
31  
32  
33

## 34 **COMPETING INTERESTS**

35  
36 J. Crapo is a Co-Principal Investigator for the COPDGene® study, and has received  
37 grants from NIH/NHLBI. A. Gupta, M. Beck, B. Langellier, C. Ittrich, F. Risse and C.  
38 Diefenbach are employees of Boehringer Ingelheim. D. A. Lynch has received grants  
39 from NHLBI, and personal fees from Boehringer Ingelheim, Parexel, Siemens and  
40 Veracyte. In addition, D. A. Lynch has a patent for 'systems and methods for  
41 classifying severity of COPD' pending. H. Watz has received grants and personal  
42 fees from Boehringer Ingelheim, and personal fees from AstraZeneca, Chiesi, GSK,  
43 Menarini and Novartis. J. Vogel-Claussen has received grants and personal fees  
44 from Boehringer Ingelheim and Novartis, and grants from GSK and Siemens  
45 Healthineers. A. M. Turner has received personal fees, payment for educational talks  
46  
47  
48  
49  
50  
51  
52  
53  
54  
55  
56  
57  
58  
59  
60

1  
2  
3 and expenses payments for work on the FOOTPRINTS steering committee from  
4  
5 Boehringer Ingelheim, grants and personal fees from AstraZeneca, CSL Behring and  
6  
7 Grifols Biotherapeutics, and grants, personal fees and non-financial support from  
8  
9 Chiesi. R. M. Mroz has received personal fees from AstraZeneca, Boehringer  
10  
11 Ingelheim, GSK, Merck Sharp & Dohme, Mundipharma, Novartis and Roche. W.  
12  
13 Janssens has received grants from AstraZeneca and Chiesi. A. Ludwig-Sengpiel  
14  
15 reports receipt of a study fee for involvement in conducting the FOOTPRINTS study.  
16  
17  
18  
19

## 20 **FUNDING OF STUDY**

21  
22  
23 This study was funded and sponsored by Boehringer Ingelheim. The trial clinical  
24  
25 monitor for this study was Markus Beck (Boehringer Ingelheim Pharma GmbH & Co.  
26  
27 KG, Dept. Clinical Research Germany/Respiratory Diseases, Birkendorfer Str. 65,  
28  
29 88397 Biberach an der Riss, Germany; Phone: +49 (0) 7351 / 54 96 803).  
30  
31

## 32 **AUTHORS' CONTRIBUTIONS**

33  
34  
35 J. Crapo, A. Gupta, D. A. Lynch, J. Vogel-Claussen, H. Watz, M. Beck, C. Ittrich, F.  
36  
37 Risse and C. Diefenbach contributed towards the overall concept and design of the  
38  
39 original study protocol. A. M. Turner also contributed towards the study design by  
40  
41 providing advice on the inclusion criteria for patients with alpha1-antitrypsin  
42  
43 deficiency. B. Langellier, C. Diefenbach, M. Beck and C. Ittrich led the writing of the  
44  
45 protocol. J. Crapo, A. Gupta, D. A. Lynch, J. Vogel-Claussen, H. Watz, M. Beck, B.  
46  
47 Langellier, C. Ittrich, F. Risse and C. Diefenbach provided critical input at all stages.  
48  
49 H. Watz, A. M. Turner, R. M. Mroz, W. Janssens and A. Ludwig-Sengpiel are  
50  
51 principal investigators of the study and were involved in enrolling patients, as well as  
52  
53 documenting patient information in the trial database. All authors have contributed  
54  
55  
56  
57  
58  
59  
60

1  
2  
3 towards the development of the manuscript, and have read and approved the final  
4  
5 manuscript.  
6  
7  
8  
9  
10  
11  
12  
13  
14  
15  
16  
17  
18  
19  
20  
21  
22  
23  
24  
25  
26  
27  
28  
29  
30  
31  
32  
33  
34  
35  
36  
37  
38  
39  
40  
41  
42  
43  
44  
45  
46  
47  
48  
49  
50  
51  
52  
53  
54  
55  
56  
57  
58  
59  
60

For peer review only

## REFERENCES

1. Global Initiative for Chronic Obstructive Lung Disease. Global strategy for the diagnosis, management, and prevention of chronic obstructive pulmonary disease (2020 report). 2019. Available: <https://goldcopd.org/wp-content/uploads/2019/11/GOLD-2020-REPORT-ver1.0wms.pdf> [Accessed June 15 2020].
2. Bourdin A, Burgel PR, Chanez P, *et al*. Recent advances in COPD: pathophysiology, respiratory physiology and clinical aspects, including comorbidities. *European Respiratory Review* 2009;18(114):198-212. doi: 10.1183/09059180.00005509
3. Sinden NJ, Stockley RA. Proteinase 3 activity in sputum from subjects with alpha-1-antitrypsin deficiency and COPD. *European Respiratory Journal* 2013;41(5):1042-50. doi: 10.1183/09031936.00089712
4. Barnes PJ. Inflammatory mechanisms in patients with chronic obstructive pulmonary disease. *Journal of Allergy and Clinical Immunology* 2016;138(1):16-27. doi: 10.1016/j.jaci.2016.05.011
5. Brode SK, Ling SC, Chapman KR. Alpha-1 antitrypsin deficiency: a commonly overlooked cause of lung disease. *CMAJ* 2012;184(12):1365-71. doi: 10.1503/cmaj.111749
6. McCarthy C, Reeves EP, McElvaney NG. The role of neutrophils in alpha-1 antitrypsin deficiency. *Annals of the American Thoracic Society* 2016;13(Suppl 4):S297-S304. doi: 10.1513/AnnalsATS.201509-634KV
7. Leung SS, Lee P, Most JE, *et al*. Images in COPD: idiopathic emphysema in a never smoker. *Chronic Obstructive Pulmonary Diseases (Miami, Fla)* 2020;7(2):130-33. doi: 10.15326/jcopdf.7.2.2020.0148 [published Online First: 2020/04/24]
8. Foreman MG, Campos M, Celedón JC. Genes and chronic obstructive pulmonary disease. *Medical Clinics of North America* 2012;96(4):699-711. doi: 10.1016/j.mcna.2012.02.006
9. Stockley RA, Edgar RG, Pillai A, *et al*. Individualized lung function trends in alpha-1-antitrypsin deficiency: a need for patience in order to provide patient centered management? *International Journal of Chronic Obstructive Pulmonary Disease* 2016;11:1745-56. doi: 10.2147/COPD.S111508
10. Demkow U, van Overveld FJ. Role of elastases in the pathogenesis of chronic obstructive pulmonary disease: implications for treatment. *European Journal of Medical Research* 2010;15(Suppl 2):27-35. doi: 10.1186/2047-783x-15-s2-27

- 1  
2  
3 11. Rønnow SR, Langholm LL, Sand JMB, *et al.* Specific elastin degradation  
4 products are associated with poor outcome in the ECLIPSE COPD cohort.  
5 *Scientific Reports* 2019;9(1):4064. doi: 10.1038/s41598-019-40785-2  
6
- 7  
8 12. Thulborn SJ, Mistry V, Brightling CE, *et al.* Neutrophil elastase as a biomarker for  
9 bacterial infection in COPD. *RespirRes* 2019;20(1):170. doi: 10.1186/s12931-  
10 019-1145-4  
11
- 12  
13 13. Sand JMB, Knox AJ, Lange P, *et al.* Accelerated extracellular matrix turnover  
14 during exacerbations of COPD. *RespirRes* 2015;16(1):69. doi:  
15 10.1186/s12931-015-0225-3  
16
- 17  
18 14. Fermont JM, Masconi KL, Jensen MT, *et al.* Biomarkers and clinical outcomes in  
19 COPD: a systematic review and meta-analysis. *Thorax* 2019;74(5):439-46.  
20 doi: 10.1136/thoraxjnl-2018-211855  
21
- 22  
23 15. Rabinovich RA, Miller BE, Wrobel K, *et al.* Circulating desmosine levels do not  
24 predict emphysema progression but are associated with cardiovascular risk  
25 and mortality in COPD. *European Respiratory Journal* 2016;47(5):1365. doi:  
26 10.1183/13993003.01824-2015  
27
- 28  
29 16. Sidhaye VK, Nishida K, Martinez FJ. Precision medicine in COPD: where are we  
30 and where do we need to go? *European Respiratory Review*  
31 2018;27(149):180004. doi: 10.1183/16000617.0022-2018  
32
- 33  
34 17. Cazzola M, Calzetta L, Rogliani P, *et al.* The challenges of precision medicine in  
35 COPD. *Molecular Diagnosis & Therapy* 2017;21(4):345-55. doi:  
36 10.1007/s40291-017-0266-z  
37
- 38  
39 18. Woodruff PG, Agusti A, Roche N, *et al.* Current concepts in targeting chronic  
40 obstructive pulmonary disease pharmacotherapy: making progress towards  
41 personalised management. *Lancet* 2015;385(9979):1789-98. doi:  
42 10.1016/S0140-6736(15)60693-6  
43
- 44  
45 19. Chapman KR, Burdon JGW, Piitulainen E, *et al.* Intravenous augmentation  
46 treatment and lung density in severe  $\alpha$ 1 antitrypsin deficiency (RAPID): a  
47 randomised, double-blind, placebo-controlled trial. *Lancet*  
48 2015;386(9991):360-68. doi: 10.1016/S0140-6736(15)60860-1  
49
- 50  
51 20. Ma S, Lin YY, Cantor JO, *et al.* The effect of alpha-1 proteinase inhibitor on  
52 biomarkers of elastin degradation in alpha-1 antitrypsin deficiency: An  
53 analysis of the RAPID/RAPID extension trials. *Chronic Obstructive Pulmonary*  
54 *Diseases* 2016;4(1):34-44. doi: 10.15326/jcopdf.4.1.2016.0156  
55
- 56  
57 21. Coxson HO, Dirksen A, Edwards LD, *et al.* The presence and progression of  
58 emphysema in COPD as determined by CT scanning and biomarker  
59 expression: a prospective analysis from the ECLIPSE study. *Lancet*  
60 *Respiratory Medicine* 2013;1(2):129-36.

- 1  
2  
3 22. Pompe E, Strand M, van Rikxoort EM, *et al.* Five-year progression of  
4 emphysema and air trapping at CT in smokers with and those without chronic  
5 obstructive pulmonary disease: results from the COPDGene study. *Radiology*  
6 2020;295(1):218-26.  
7  
8  
9 23. Schroeder JD, McKenzie AS, Zach JA, *et al.* Relationships between airflow  
10 obstruction and quantitative CT measurements of emphysema, air trapping,  
11 and airways in subjects with and without chronic obstructive pulmonary  
12 disease. *AmJRoentgenol* 2013;201(3):W460-W70.  
13  
14 24. Stockley RA, Parr DG, Piitulainen E, *et al.* Therapeutic efficacy of alpha-1  
15 antitrypsin augmentation therapy on the loss of lung tissue: an integrated  
16 analysis of 2 randomised clinical trials using computed tomography  
17 densitometry. *RespirRes* 2010;11(1):136. doi: 10.1186/1465-9921-11-136  
18  
19 25. Global Initiative for Chronic Obstructive Lung Disease. Global strategy for the  
20 diagnosis, management and prevention of COPD: Global Initiative for Chronic  
21 Obstructive Lung Disease (2015 report). 2015. Available: <http://goldcopd.org/>  
22 [Accessed August 3 2015].  
23  
24 26. Sieren JP, Newell JD, Judy PF, *et al.* Reference standard and statistical model  
25 for intersite and temporal comparisons of CT attenuation in a multicenter  
26 quantitative lung study. *Medical physics* 2012;39(9):5757-67. doi:  
27 10.1118/1.4747342  
28  
29 27. European Federation of Pharmaceutical Industries and Associations. The EFPIA  
30 Code of Practice 2019. Available: <https://www.efpia.eu/relationships-code/the-efpia-code/> [Accessed March 1 2020].  
31  
32 28. International Federation of Pharmaceutical Manufacturers & Associations.  
33 IFPMA Code of Practice 2019. Available: <https://www.ifpma.org/resource-centre/ifpma-code-of-practice-2019/> [Accessed March 1 2020].  
34  
35 29. Pharmaceutical Research and Manufacturers of America. PhRMA Code on  
36 Interactions with Health Care Professionals. 2019. Available:  
37 [https://www.phrma.org/-/media/Project/PhRMA/PhRMA-Org/PhRMA-](https://www.phrma.org/-/media/Project/PhRMA/PhRMA-Org/PhRMA-Org/PDF/A-C/Code-of-Interaction_FINAL21.pdf)  
38 [Org/PDF/A-C/Code-of-Interaction\\_FINAL21.pdf](https://www.phrma.org/-/media/Project/PhRMA/PhRMA-Org/PhRMA-Org/PDF/A-C/Code-of-Interaction_FINAL21.pdf) [Accessed March 1 2020].  
39  
40 30. MacIntyre N, Crapo RO, Viegi G, *et al.* Standardisation of the single-breath  
41 determination of carbon monoxide uptake in the lung. *European Respiratory*  
42 *Journal* 2005;26(4):720-35. doi: 10.1183/09031936.05.00034905  
43  
44 31. ATS Committee on Proficiency Standards for Clinical Pulmonary Function  
45 Laboratories. ATS statement: guidelines for the six-minute walk test.  
46 *American Journal of Respiratory and Critical Care Medicine* 2002;166(1):111-  
47 17. doi: 10.1164/ajrccm.166.1.at1102  
48  
49 32. Koo H-K, Jin KN, Kim DK, *et al.* Association of incidental emphysema with  
50 annual lung function decline and future development of airflow limitation.  
51  
52  
53  
54  
55  
56  
57  
58  
59  
60

- 1  
2  
3 *International journal of chronic obstructive pulmonary disease* 2016;11:161-  
4 66. doi: 10.2147/COPD.S96809  
5  
6  
7 33. Nishimura M, Makita H, Nagai K, *et al.* Annual change in pulmonary function and  
8 clinical phenotype in chronic obstructive pulmonary disease. *American*  
9 *Journal of Respiratory and Critical Care Medicine* 2012;185(1):44-52. doi:  
10 10.1164/rccm.201106-0992OC  
11  
12  
13 34. Welte T, Vogelmeier C, Papi A. COPD: early diagnosis and treatment to slow  
14 disease progression. *International Journal of Clinical Practice* 2015;69(3):336-  
15 49. doi: 10.1111/ijcp.12522  
16  
17 35. Tantucci C, Modina D. Lung function decline in COPD. *International Journal of*  
18 *Chronic Obstructive Pulmonary Disease* 2012;7:95-99. doi:  
19 10.2147/COPD.S27480  
20  
21  
22 36. Nishimura K, Izumi T, Tsukino M, *et al.* Dyspnea is a better predictor of 5-year  
23 survival than airway obstruction in patients with COPD. *CHEST*  
24 2002;121(5):1434-40. doi: 10.1378/chest.121.5.1434  
25  
26 37. Gans MD, Gavrilova T. Understanding the immunology of asthma:  
27 Pathophysiology, biomarkers, and treatments for asthma endotypes.  
28 *PaediatrRespirRev* 2019:[In press]. doi: 10.1016/j.prrv.2019.08.002  
29  
30  
31 38. Zemans RL, Jacobson S, Keene J, *et al.* Multiple biomarkers predict disease  
32 severity, progression and mortality in COPD. *RespirRes* 2017;18(1):117. doi:  
33 10.1186/s12931-017-0597-7  
34  
35  
36 39. Dickens JA, Miller BE, Edwards LD, *et al.* COPD association and repeatability of  
37 blood biomarkers in the ECLIPSE cohort. *RespirRes* 2011;12:146. doi:  
38 10.1186/1465-9921-12-146  
39  
40 40. Crossley D, Renton M, Khan M, *et al.* CT densitometry in emphysema: a  
41 systematic review of its clinical utility. *International Journal of Chronic*  
42 *Obstructive Pulmonary Disease* 2018;13:547-63. doi:  
43 10.2147/COPD.S143066  
44  
45  
46 41. Lowe KE, Regan EA, Anzueto A, *et al.* COPDGene® 2019: redefining the  
47 diagnosis of chronic obstructive pulmonary disease. *Chronic Obstructive*  
48 *Pulmonary Diseases* 2019;6(5):384-99. doi: 10.15326/jcopdf.6.5.2019.0149  
49 [published Online First: 2019/11/12]  
50  
51  
52 42. Ritchie AI, Donaldson GC, El-Emir E, *et al.* The British Lung Foundation Early  
53 COPD Consortium - recruitment and results from an initial pilot. *American*  
54 *Journal of Respiratory and Critical Care Medicine* 2019;199:A3280. doi:  
55 10.1164/ajrccm-conference.2019.199.1\_MeetingAbstracts.A3280  
56  
57  
58  
59  
60

- 1  
2  
3 43. Vestbo J, Anderson W, Coxson HO, *et al.* Evaluation of COPD Longitudinally to  
4 Identify Predictive Surrogate End-points (ECLIPSE). *European Respiratory*  
5 *Journal* 2008;31(4):869-73. doi: 10.1183/09031936.00111707  
6  
7  
8 44. Couper D, LaVange LM, Han M, *et al.* Design of the subpopulations and  
9 intermediate outcomes in COPD study (SPIROMICS). *Thorax*  
10 2014;69(5):492-95. doi: 10.1136/thoraxjnl-2013-203897  
11  
12 45. Karch A, Vogelmeier C, Welte T, *et al.* The German COPD cohort COSYCONET:  
13 Aims, methods and descriptive analysis of the study population at baseline.  
14 *Respiratory Medicine* 2016;114:27-37. doi: 10.1016/j.rmed.2016.03.008  
15  
16 46. Bourbeau J, Tan WC, Benedetti A, *et al.* Canadian Cohort Obstructive Lung  
17 Disease (CanCOLD): Fulfilling the need for longitudinal observational studies  
18 in COPD. *COPD: Journal of Chronic Obstructive Pulmonary Disease*  
19 2014;11(2):125-32. doi: 10.3109/15412555.2012.665520  
20  
21 47. Regan EA, Hokanson JE, Murphy JR, *et al.* Genetic epidemiology of COPD  
22 (COPDGene) study design. *COPD* 2010;7(1):32-43. doi:  
23 10.3109/15412550903499522  
24  
25 48. ClinicalTrials.gov. The BLF Early COPD Development Partnership Grant. 2018  
26 updated 16/04/2019. Available:  
27 <https://clinicaltrials.gov/ct2/show/NCT03480347> [Accessed February 18  
28 2020].  
29  
30 49. Takei N, Suzuki M, Makita H, *et al.* Serum alpha-1 antitrypsin levels and the  
31 clinical course of chronic obstructive pulmonary disease. *International Journal*  
32 *of Chronic Obstructive Pulmonary Disease* 2019;14:2885-93. doi:  
33 10.2147/COPD.S225365  
34  
35 50. COPDGene. Study protocol: Genetic epidemiology of chronic obstructive  
36 pulmonary disease (COPDGene®), 2009.  
37  
38 51. Hoffman EA, Simon BA, McLennan G. State of the art. A structural and functional  
39 assessment of the lung via multidetector-row computed tomography.  
40 *Proceedings of the American Thoracic Society* 2006;3(6):519-32. doi:  
41 10.1513/pats.200603-086MS  
42  
43 52. Ashraf H, Lo P, Shaker SB, *et al.* Short-term effect of changes in smoking  
44 behaviour on emphysema quantification by CT. *Thorax* 2011;66(1):55-60. doi:  
45 10.1136/thx.2009.132688  
46  
47 53. Shaker SB, Stavngaard T, Laursen LC, *et al.* Rapid fall in lung density following  
48 smoking cessation in COPD. *COPD: Journal of Chronic Obstructive*  
49 *Pulmonary Disease* 2011;8(1):2-7. doi: 10.3109/15412555.2010.541306  
50  
51  
52  
53  
54  
55  
56  
57  
58  
59  
60



- 1  
2  
3 54. Wan ES, Castaldi PJ, Cho MH, *et al.* Epidemiology, genetics, and subtyping of  
4 preserved ratio impaired spirometry (PRISm) in COPDGene. *RespirRes*  
5 2014;15(1):89. doi: 10.1186/s12931-014-0089-y  
6  
7  
8 55. Wan ES, Fortis S, Regan EA, *et al.* Longitudinal phenotypes and mortality in  
9 preserved ratio impaired spirometry in the COPDGene Study. *American*  
10 *Journal of Respiratory and Critical Care Medicine* 2018;198(11):1397-405.  
11 doi: 10.1164/rccm.201804-0663OC  
12  
13  
14  
15  
16  
17  
18  
19  
20  
21  
22  
23  
24  
25  
26  
27  
28  
29  
30  
31  
32  
33  
34  
35  
36  
37  
38  
39  
40  
41  
42  
43  
44  
45  
46  
47  
48  
49  
50  
51  
52  
53  
54  
55  
56  
57  
58  
59  
60

For peer review only

## Figure legend

### Figure 1. Overview of trial design

<sup>a</sup>A1ATD analysis only; this occurs at Visit 1 only. <sup>b</sup>mMRC only. <sup>c</sup>At Visit 1, the 6-minute walk test is being performed to train the patients for the procedure. <sup>d</sup>Symptom questionnaires include the CAT, mMRC and SGRQ. The CAT, mMRC and SGRQ are being conducted in patients with COPD and with COPD plus A1AT deficiency only. <sup>e</sup>A full panel of haematology, blood chemistry, and coagulation parameters is performed at Visits 1, 2, 5, 6 and 7, with a reduced panel comprising of haematology, differential automatic cell counts, fibrinogen, highly sensitive C-reactive protein and creatinine performed at Visits 3 and 4.

A1ATD, alpha1-antitrypsin deficiency; CAT, COPD assessment test; COPD, chronic obstructive pulmonary disease; CT, computed tomography; MESI, medical events of special interest; mMRC, modified Medical Research Council dyspnoea scale; MRI, magnetic resonance imaging; SGRQ, St. George's Respiratory Questionnaire.

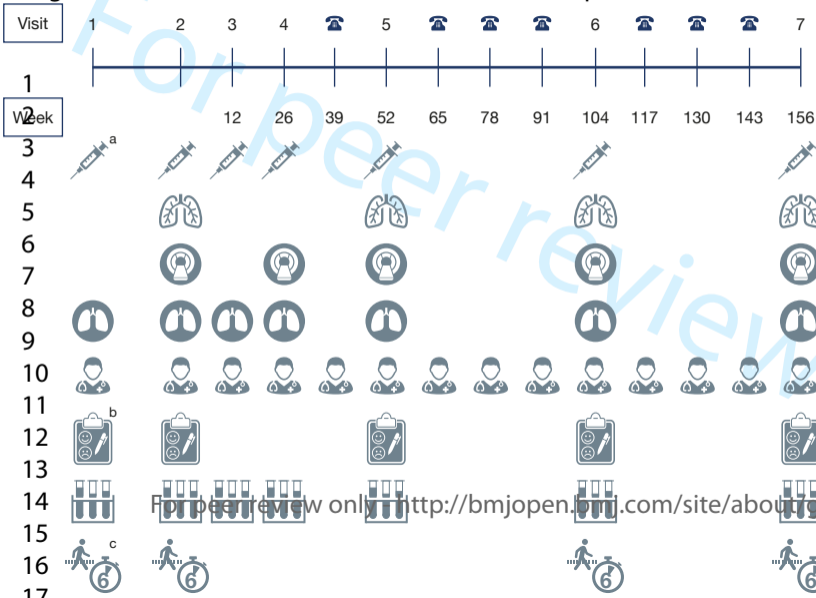

-  Soluble biomarkers
-  CT scanning
-  MRI scanning
-  Lung function testing
-  Reporting of adverse events and MESI
-  Symptom questionnaires<sup>d</sup>
-  Safety laboratory parameters<sup>e</sup>
-  6-minute walk test

1  
2  
3 **Supplementary text 1. Participant enrolment and retention, sample size**  
4 **calculation, and power calculations for annual decline in forced expiratory**  
5 **volume in 1 second and 15th percentile density assessed by CT**  
6  
7  
8  
9

10 To achieve adequate participant enrolment, a recruitment plan was set up prior to  
11 the start of recruitment; this detailed the number of subjects expected at each site  
12 across the different study populations, and was based on feedback during site  
13 feasibility assessments. This plan was monitored constantly during the recruitment  
14 phase to track planned versus actual enrolment numbers. Local approaches to  
15 facilitate recruitment, such as advertising, were also used. To promote participant  
16 retention, a comprehensive strategy was set up during the course of the study. This  
17 included maintaining frequent contact with study participants (especially from Visits 5  
18 to 7, where visits are 1 year apart), for example via phonecalls and greetings cards,  
19 as well as awareness training for site staff.  
20  
21  
22  
23  
24  
25  
26  
27  
28  
29  
30  
31  
32

33 As this study is exploratory in nature, sample size calculations are focused on  
34 achieving the desired precision for biomarker estimates and relevant clinical  
35 assessments in all COPD patient groups except for the A1ATD group. This study  
36 planned to enrol 125 patients with mild COPD, 125 with moderate COPD and 125  
37 with severe COPD – by assuming a  $\leq 20\%$  dropout rate after 3 years, at least 100  
38 subjects per group are expected to contribute to the analysis by the end of the study  
39 period.  
40  
41  
42  
43  
44  
45  
46  
47  
48

49 For annual decline in forced expiratory volume in 1 second (FEV<sub>1</sub>), available  
50 information reports standard deviations (SDs) ranging from about 20 mL/year [1] to  
51 60 mL/year.[2] Using this information and considering a planned 100 subjects in  
52 each group, supplementary table 1 reports the coverage probability for the half-width  
53 of a 95% confidence interval (CI) for annual FEV<sub>1</sub> decline for a given SD. For  
54  
55  
56  
57  
58  
59  
60

1  
2  
3 example, if the observed SD is 50 mL/year, and the true half-width of the CI is 11  
4 mL/year, with 100 subjects, the probability that the observed CI covers the true CI is  
5 93.8%. The reported SD on annual decline in 15th percentile density (PD15) ranges  
6 from 3.4 g/L [3] to 5.5 g/L.[4] Using the same assumptions as for FEV<sub>1</sub> decline, we  
7 report the coverage probability of a true CI for a given SD and half-width of the CI for  
8 100 subjects (supplementary table 2).  
9  
10  
11  
12  
13  
14  
15  
16

17 In addition, with 100 subjects in each group, and allowing for up to 15 covariates, a  
18 partial Pearson correlation coefficient of 0.30 can be declared significant with 80%  
19 power between any two continuous variables (e.g. FEV<sub>1</sub> and a new biomarker) within  
20 the group.  
21  
22  
23  
24  
25  
26  
27  
28  
29  
30  
31  
32  
33  
34  
35  
36  
37  
38  
39  
40  
41  
42  
43  
44  
45  
46  
47  
48  
49  
50  
51  
52  
53  
54  
55  
56  
57  
58  
59  
60

**Supplementary table 1. Study sites**

| <b>Study site and address</b>                                                                                                    |
|----------------------------------------------------------------------------------------------------------------------------------|
| <b>United States, Alabama</b>                                                                                                    |
| University of Alabama at Birmingham<br>Birmingham, Alabama, United States, 35294                                                 |
| <b>United States, California</b>                                                                                                 |
| University of California San Diego<br>San Diego, California, United States, 92103-8415                                           |
| The Lundquist Institute for Biomedical Innovation at<br>Harbor-UCLA Medical Center<br>Torrance, California, United States, 90502 |
| <b>United States, Colorado</b>                                                                                                   |
| National Jewish Health<br>Denver, Colorado, United States, 80206                                                                 |
| <b>United States, Iowa</b>                                                                                                       |
| University of Iowa Hospitals and Clinics<br>Iowa City, Iowa, United States, 52242                                                |
| <b>United States, Maryland</b>                                                                                                   |
| Johns Hopkins University<br>Baltimore, Maryland, United States, 21224                                                            |
| <b>United States, Massachusetts</b>                                                                                              |
| Brigham and Women's Hospital<br>Boston, Massachusetts, United States, 02115                                                      |

|                                                                                              |
|----------------------------------------------------------------------------------------------|
| <b>Study site and address</b>                                                                |
| <b>United States, Pennsylvania</b>                                                           |
| Temple University Hospital<br>Philadelphia, Pennsylvania, United States, 19140               |
| <b>United States, Texas</b>                                                                  |
| Baylor College of Medicine<br>Houston, Texas, United States, 77030                           |
| Diagnostics Research Group<br>San Antonio, Texas, United States, 78229                       |
| <b>United States, Utah</b>                                                                   |
| University of Utah Health Sciences Center<br>Salt Lake City, Utah, United States, 84108      |
| <b>Belgium</b>                                                                               |
| Brussels – UNIV St-Pierre<br>Brussels, Belgium, 1000                                         |
| UZ Leuven<br>Leuven, Belgium, 3000                                                           |
| <b>Canada, Alberta</b>                                                                       |
| University of Alberta Hospital (University of Alberta)<br>Edmonton, Alberta, Canada, T6G 1Z1 |
| <b>Canada, Ontario</b>                                                                       |
| Saint Joseph's Healthcare<br>Hamilton, Ontario, Canada, L8N 4A6                              |
| McMaster University Medical Centre<br>Hamilton, Ontario, Canada, L8N 4K1                     |

|                                                                             |
|-----------------------------------------------------------------------------|
| <b>Study site and address</b>                                               |
| <b>Canada, Quebec</b>                                                       |
| McGill University Health Centre (MUHC)<br>Montreal, Quebec, Canada, H4A 3J1 |
| <b>Canada, Saskatchewan</b>                                                 |
| Royal University Hospital<br>Saskatoon, Saskatchewan, Canada, S7N 0W8       |
| <b>Canada</b>                                                               |
| IUCPQ (Laval University)<br>Quebec, Canada, G1V 4G5                         |
| <b>Denmark</b>                                                              |
| Aarhus University Hospital, Skejby<br>Aarhus N, Denmark, 8200               |
| Gentofte Hospital<br>Hellerup, Denmark, 2900                                |
| Hvidovre Hospital<br>Hvidovre, Denmark, 2650                                |
| <b>Finland</b>                                                              |
| HYKS Keuhkosairauksien tutkimusyksikkö<br>Helsinki, Finland, 00029          |
| TYKS, Keuhkosairauksien klinikka, Turku<br>Turku, Finland, 20520            |
| <b>Germany</b>                                                              |
| IKF Pneumologie GmbH & Co. KG<br>Frankfurt, Germany, 60596                  |



|    |                                                        |
|----|--------------------------------------------------------|
| 1  |                                                        |
| 2  |                                                        |
| 3  |                                                        |
| 4  | <b>Study site and address</b>                          |
| 5  |                                                        |
| 6  | Pneumologisches Forschungsinstitut an der LungenClinic |
| 7  | Grosshansdorf GmbH                                     |
| 8  | Grosshansdorf, Germany, 22927                          |
| 9  |                                                        |
| 10 |                                                        |
| 11 | Fraunhofer ITEM                                        |
| 12 | Hannover, Germany, 30625                               |
| 13 |                                                        |
| 14 |                                                        |
| 15 | KLB Gesundheitsforschung Lübeck GmbH                   |
| 16 | Lübeck, Germany, 23552                                 |
| 17 |                                                        |
| 18 |                                                        |
| 19 |                                                        |
| 20 | <b>Japan</b>                                           |
| 21 |                                                        |
| 22 | Kagoshima University Medical And Dental Hospital       |
| 23 | Kagoshima, Kagoshima, Japan, 890-8520                  |
| 24 |                                                        |
| 25 |                                                        |
| 26 | Showa University Fujigaoka Hospital                    |
| 27 | Kanagawa, Yokohama, Japan, 227-8501                    |
| 28 |                                                        |
| 29 |                                                        |
| 30 | Kishiwada City Hospital                                |
| 31 | Osaka, Kishiwada, Japan, 596-8501                      |
| 32 |                                                        |
| 33 |                                                        |
| 34 | Osaka City University Hospital                         |
| 35 | Osaka, Osaka, Japan, 545-8586                          |
| 36 |                                                        |
| 37 |                                                        |
| 38 | Showa University Hospital                              |
| 39 | Tokyo, Shinagawa-ku, Japan, 142-8666                   |
| 40 |                                                        |
| 41 |                                                        |
| 42 | <b>Republic of Korea</b>                               |
| 43 |                                                        |
| 44 |                                                        |
| 45 | Konkuk University Medical Center                       |
| 46 | Seoul, Republic of Korea, 05030                        |
| 47 |                                                        |
| 48 |                                                        |
| 49 | SMG-SNU Boramae Medical Center                         |
| 50 | Seoul, Republic of Korea, 07061                        |
| 51 |                                                        |
| 52 |                                                        |
| 53 | Korea University Guro Hospital                         |
| 54 | Seoul, Republic of Korea, 08308                        |
| 55 |                                                        |
| 56 |                                                        |
| 57 |                                                        |
| 58 |                                                        |
| 59 |                                                        |
| 60 |                                                        |

|                                                                                                    |
|----------------------------------------------------------------------------------------------------|
| <b>Study site and address</b>                                                                      |
| The Catholic University of Korea, Eunpyeong St. Mary's Hospital<br>Seoul, Republic of Korea, 22711 |
| <b>Poland</b>                                                                                      |
| Respiratory Medicine Centre, private prac., Bialystok<br>Bialystok, Poland, 15044                  |
| University Clinical Center, Gdansk<br>Gdansk, Poland, 80 952                                       |
| Institute of Tuberculosis & Lung Disease, Warsaw<br>Warsaw, Poland, 01138                          |
| <b>Spain</b>                                                                                       |
| Hospital del Mar<br>Barcelona, Spain, 08003                                                        |
| Hospital Vall d'Hebron<br>Barcelona, Spain, 08035                                                  |
| Hospital Clínic de Barcelona<br>Barcelona, Spain, 08036                                            |
| Hospital de Bellvitge<br>L'Hospitalet de Llobregat, Spain, 08907                                   |
| Hospital Son Espases<br>Palma de Mallorca, Spain, 07010                                            |
| Hospital Quirónsalud Madrid<br>Pozuelo de Alarcón, Spain, 28223                                    |
| <b>Sweden</b>                                                                                      |
| Skånes universitetssjukhus, Lund<br>Lund, Sweden, 221 85                                           |

|                                                                  |
|------------------------------------------------------------------|
| <b>Study site and address</b>                                    |
| <b>United Kingdom</b>                                            |
| Queen Elizabeth Hospital<br>Birmingham, United Kingdom, B15 2GW  |
| Glenfield Hospital<br>Leicester, United Kingdom, LE3 9QP         |
| Royal Free Hospital<br>London, United Kingdom, NW3 2PF           |
| Medicines Evaluation Unit<br>Manchester, United Kingdom, M23 9QZ |

**Supplementary table 2. Coverage probability of 95% CIs for FEV<sub>1</sub> annual decline based on 100 subjects**

| SD | Half-width of a 95% CI |        |        |        |        |        |        |        |        |        |
|----|------------------------|--------|--------|--------|--------|--------|--------|--------|--------|--------|
|    | 6                      | 7      | 8      | 9      | 10     | 11     | 12     | 13     | 14     | 15     |
| 25 | 0.998                  | >0.999 | >0.999 | >0.999 | >0.999 | >0.999 | >0.999 | >0.999 | >0.999 | >0.999 |
| 30 | 0.557                  | 0.993  | >0.999 | >0.999 | >0.999 | >0.999 | >0.999 | >0.999 | >0.999 | >0.999 |
| 35 | 0.026                  | 0.557  | 0.983  | >0.999 | >0.999 | >0.999 | >0.999 | >0.999 | >0.999 | >0.999 |
| 40 | <0.001                 | 0.048  | 0.557  | 0.97   | >0.999 | >0.999 | >0.999 | >0.999 | >0.999 | >0.999 |
| 45 | <0.001                 | <0.001 | 0.072  | 0.557  | 0.954  | >0.999 | >0.999 | >0.999 | >0.999 | >0.999 |
| 50 | <0.001                 | <0.001 | 0.003  | 0.097  | 0.557  | 0.938  | 0.998  | >0.999 | >0.999 | >0.999 |
| 55 | <0.001                 | <0.001 | <0.001 | 0.006  | 0.122  | 0.557  | 0.921  | 0.996  | >0.999 | >0.999 |
| 60 | <0.001                 | <0.001 | <0.001 | <0.001 | 0.011  | 0.146  | 0.557  | 0.905  | 0.993  | >0.999 |
| 65 | <0.001                 | <0.001 | <0.001 | <0.001 | <0.001 | 0.018  | 0.168  | 0.557  | 0.889  | 0.988  |
| 70 | <0.001                 | <0.001 | <0.001 | <0.001 | <0.001 | 0.001  | 0.026  | 0.189  | 0.557  | 0.873  |

CI, confidence interval; FEV<sub>1</sub>, forced expiratory volume in 1 second; SD, standard deviation.

1  
2  
3  
4  
5  
6  
7  
8  
9  
10  
11  
12  
13  
14  
15  
16  
17  
18  
19  
20  
21  
22  
23  
24  
25  
26  
27  
28  
29  
30  
31  
32  
33  
34  
35  
36  
37  
38  
39  
40  
41  
42  
43  
44  
45  
46

**Supplementary table 3. Coverage probability of 95% CIs for PD15 annual decline based on 100 subjects**

| SD  | Half-width of a 95% CI |        |        |        |        |        |        |        |        |        |        |        |
|-----|------------------------|--------|--------|--------|--------|--------|--------|--------|--------|--------|--------|--------|
|     | 0.55                   | 0.60   | 0.65   | 0.70   | 0.75   | 0.80   | 0.85   | 0.90   | 0.95   | 1.00   | 1.05   |        |
| 2.5 | 0.938                  | 0.998  | >0.999 | >0.999 | >0.999 | >0.999 | >0.999 | >0.999 | >0.999 | >0.999 | >0.999 | >0.999 |
| 3.0 | 0.146                  | 0.557  | 0.905  | 0.993  | >0.999 | >0.999 | >0.999 | >0.999 | >0.999 | >0.999 | >0.999 | >0.999 |
| 3.5 | 0.001                  | 0.026  | 0.189  | 0.557  | 0.873  | 0.983  | 0.999  | >0.999 | >0.999 | >0.999 | >0.999 | >0.999 |
| 4.0 | <0.001                 | <0.001 | 0.005  | 0.048  | 0.226  | 0.557  | 0.846  | 0.970  | 0.997  | >0.999 | >0.999 | >0.999 |
| 4.5 | <0.001                 | <0.001 | <0.001 | <0.001 | 0.011  | 0.072  | 0.257  | 0.557  | 0.822  | 0.954  | 0.993  | 0.993  |
| 5.0 | <0.001                 | <0.001 | <0.001 | <0.001 | <0.001 | 0.003  | 0.021  | 0.097  | 0.284  | 0.557  | 0.801  | 0.801  |
| 5.5 | <0.001                 | <0.001 | <0.001 | <0.001 | <0.001 | <0.001 | <0.001 | 0.006  | 0.033  | 0.122  | 0.306  | 0.306  |
| 6.0 | <0.001                 | <0.001 | <0.001 | <0.001 | <0.001 | <0.001 | <0.001 | <0.001 | 0.002  | 0.011  | 0.048  | 0.048  |

CI, confidence interval; PD15, lung density at the 15<sup>th</sup> percentile point of the CT histogram; SD, standard deviation.

**Supplementary table 4. Overview of permitted and restricted medications/therapy**

| <b>Drug class</b>                   | <b>Prior to Visit 1</b>     | <b>Between Visits 1 and 2</b>           | <b>Observational period</b> |
|-------------------------------------|-----------------------------|-----------------------------------------|-----------------------------|
| Corticosteroid – nasal/ocular       | Permitted                   | Permitted                               | Permitted                   |
| Corticosteroid – oral, inhaled*     | Permitted <sup>†</sup>      | Permitted<br>(stable dose) <sup>‡</sup> | Permitted                   |
| Corticosteroid – i.v., i.m.         | Permitted <sup>†</sup>      | Not permitted <sup>‡</sup>              | Permitted                   |
| SABA – inhaled <sup>§</sup>         | Permitted <sup>†</sup>      | Permitted<br>(stable dose) <sup>‡</sup> | Permitted                   |
| LABA – inhaled <sup>§</sup>         | Permitted <sup>†</sup>      | Permitted<br>(stable dose) <sup>‡</sup> | Permitted                   |
| SAMA – inhaled                      | Permitted <sup>†</sup>      | Permitted<br>(stable dose) <sup>‡</sup> | Permitted                   |
| LAMA – inhaled <sup>§</sup>         | Permitted <sup>†</sup>      | Permitted<br>(stable dose) <sup>‡</sup> | Permitted                   |
| Leukotriene modifier                | Permitted <sup>†</sup>      | Permitted<br>(stable dose) <sup>‡</sup> | Permitted                   |
| Cromolyn sodium / nedocromil sodium | Permitted <sup>†</sup>      | Permitted<br>(stable dose) <sup>‡</sup> | Permitted                   |
| Methylxanthines                     | Not permitted <sup>  </sup> | Not permitted                           | Permitted                   |
| PDE-4 inhibitors                    | Not permitted <sup>  </sup> | Not permitted                           | Permitted                   |

|                                 |                                                 |                             |               |               |
|---------------------------------|-------------------------------------------------|-----------------------------|---------------|---------------|
| 1<br>2<br>3<br>4<br>5<br>6<br>7 | Immunomodulators (e.g. methotrexate)            | Not permitted <sup>  </sup> | Not permitted | Permitted     |
| 8<br>9<br>10<br>11<br>12        | Immunotherapy (e.g. subcutaneous or sublingual) | Permitted <sup>†</sup>      | Permitted     | Permitted     |
| 13<br>14<br>15<br>16            | Biologic antagonists (e.g. omalizumab)          | Not permitted <sup>  </sup> | Not permitted | Not permitted |
| 17<br>18<br>19<br>20<br>21      | A1AT augmentation therapy                       | Not permitted               | Not permitted | Permitted     |
| 22<br>23<br>24<br>25<br>26      | Other investigational drugs                     | Not permitted               | Not permitted | Not permitted |

27 \*For patients taking stable maintenance OCS with a total daily dose of  $\leq 20$  mg prednisone or equivalent.

28 †Allowed as stable dose for at least 4 weeks before Visit 1.

29 ‡If unstable (e.g. in case of exacerbations), extend screening period.

30 §Includes fixed dose combination therapy.

31 ||Allowed before Visit 1 with a washout period of 3 months or 6 half-lives whichever is greater.

32 A1AT, alpha1-antitrypsin; LABA, long-acting  $\beta 2$ -adrenergic agonist; LAMA, long-acting anticholinergic; OCS, oral corticosteroids; PDE-4, phosphodiesterase-4; SABA, short-acting  $\beta 2$ -adrenergic agonist; SAMA, short-acting anticholinergic.

**Supplementary table 5. Steering committee members**

| <b>Scientific expert</b> | <b>Affiliation</b>                                                                     | <b>Role</b>              |
|--------------------------|----------------------------------------------------------------------------------------|--------------------------|
| Prof. James Crapo        | National Jewish Health, Denver (CO), USA                                               | Chair/Advisor/Discussant |
| Prof. David Lynch        | National Jewish Health, Denver (CO), USA                                               | Advisor/Discussant       |
| Dr. Henrik Watz          | Pulmonary Research Institute, Lungen Clinic Grosshansdorf GmbH, Grosshansdorf, Germany | Advisor/Discussant       |
| Prof. Pascal Chanez      | CHU Marseille – Hôpital Nord, Marseille, France                                        | Advisor/Discussant       |
| Prof. Gaetan Deslee      | CHU Reims – Hôpital Maison Blanche, Reims, France                                      | Advisor/Discussant       |
| Dr. Alice Turner         | Centre for Translational Inflammation Research, Birmingham, UK                         | Advisor/Discussant       |
| Dr. Richard Casaburi     | Los Angeles Biomedical Research Institute, Torrance (CA), USA                          | Advisor/Discussant       |
| Prof. Kazuhisa Asai      | Osaka University Graduate School of Medicine, Osaka, Japan                             | Advisor/Discussant       |
| Dr. Harald Koegler       | Boehringer Ingelheim                                                                   | Medical Project Lead     |
| Dr. Markus Beck          | Boehringer Ingelheim                                                                   | Participant/Discussant   |
| Dr. Claudia Diefenbach   | Boehringer Ingelheim                                                                   | Participant/Discussant   |
| Dr. Frank Risse          | Boehringer Ingelheim                                                                   | Participant/Discussant   |
| Dr Abhya Gupta           | Boehringer Ingelheim                                                                   | Participant/Discussant   |



**Supplementary table 6. CT scan protocol in inspiration and expiration**

|                        |                                                                                                                                                                                                                                                                                |
|------------------------|--------------------------------------------------------------------------------------------------------------------------------------------------------------------------------------------------------------------------------------------------------------------------------|
| Scan coverage          | Lung apices to costophrenic recesses                                                                                                                                                                                                                                           |
| Scanning mode          | Helical                                                                                                                                                                                                                                                                        |
| Scanning plane         | Axial                                                                                                                                                                                                                                                                          |
| Dose modulation        | On                                                                                                                                                                                                                                                                             |
| Detector configuration | 64 x 0.625 mm (GE VCT Discovery STE, VCT Discovery 750HD 64 slice)<br>64 x 0.5 mm (Philips Brilliance 64 slice)<br>(64)32 x 0.6 mm (Siemens Definition DS, Sensation 64 slice)<br>(128)64 x 0.6 mm (Siemens Definition Edge, AS+ 128 slice, Flash 128 slice, Somatom Force)    |
| kVp                    | 120 kVp                                                                                                                                                                                                                                                                        |
| mA/mAs                 | GE (750HD, Discovery STE): Target noise index: 66.5, Maximum mA limit 100<br>Philips (Brilliance 64): Reference mAs – 46 mAs (128 mA)<br>Siemens (effective mA): Sensation 64, Definition (DS/AS 64 slice)/(AS+ 128 slice/Flash 128 slice), Edge, Force – Reference mAs 35 mAs |
| Pitch                  | GE (Discovery 750HD, Discovery STE) – 0.984<br>Philips (Brilliance 64) – 0.923<br>Siemens – 1.0                                                                                                                                                                                |
| Rotation time          | 0.5 s                                                                                                                                                                                                                                                                          |
| <b>Reconstructions</b> |                                                                                                                                                                                                                                                                                |
| Non-iterative          | GE (750HD, Discovery STE): Standard, Bone<br>Philips (Brilliance 64): B, D (YB)                                                                                                                                                                                                |

|           |                                                                                                                                                                                                                                                                                                                                                                                                          |
|-----------|----------------------------------------------------------------------------------------------------------------------------------------------------------------------------------------------------------------------------------------------------------------------------------------------------------------------------------------------------------------------------------------------------------|
|           | Siemens (Sensation 64, Definition DS/AS/AS+/Flash 64/128): B31f, B45f (B46f)<br>Siemens (Somatom Force): Bf40d, Qr44d<br>Siemens (Somatom Definition Edge): Bf37f, Bv45f                                                                                                                                                                                                                                 |
| Iterative | GE (750HD, Discovery STE): Standard ASIR 40%, Bone ASIR 40%, Standard ASIR 100%<br>Philips (Brilliance 64): B iDose L3, D (YB) iDose L3, B iDose L7<br>Siemens (Sensation 64, Definition DS/AS/AS+/Flash 64/128): I31f SAFIRE 2, I44f SAFIRE 2, I31f SAFIRE 5<br>Siemens (Somatom Force): Bf40d ADMIRE 2, Qr44d ADMIRE 2, Bf40d ADMIRE 5<br>Siemens (Somatom Definition Edge): Bf37 f2, Br54 f2, Bf37 f5 |
| Thickness | GE (Discovery 750HD, Discovery STE) – 0.625<br>Philips (Brilliance 64) – 0.67<br>Siemens – 0.75 mm                                                                                                                                                                                                                                                                                                       |
| Interval  | 0.5 mm                                                                                                                                                                                                                                                                                                                                                                                                   |
| DFOV      | Lungs (no more than a 1 cm margin outside of the lungs on either side of the scan, where the lungs are the widest in the chest)                                                                                                                                                                                                                                                                          |
| HD mode   | GE (750HD, Discovery STE): OFF<br>Philips (Brilliance 64): n/a<br>Siemens (Sensation 64, Definition Edge/DS/AS/AS+/Flash 64/128, Somatom Force): n/a                                                                                                                                                                                                                                                     |

DFOV, display field of view; HD, high definition.

## References

1. Nishimura M, Makita H, Nagai K, *et al*. Annual change in pulmonary function and clinical phenotype in chronic obstructive pulmonary disease. *Am J Respir Crit Care Med* 2012;185(1):44-52. doi: 10.1164/rccm.201106-0992OC
2. Bhatt SP, Bodduluri S, Hoffman EA, *et al*. Computed tomography measure of lung at risk and lung function decline in chronic obstructive pulmonary disease. *Am J Respir Crit Care Med* 2017;196(5):569-76.
3. Coxson HO, Dirksen A, Edwards LD, *et al*. The presence and progression of emphysema in COPD as determined by CT scanning and biomarker expression: a prospective analysis from the ECLIPSE study. *Lancet Respir Med* 2013;1(2):129-36.
4. Dirksen A, Piitulainen E, Parr D, *et al*. Exploring the role of CT densitometry: a randomised study of augmentation therapy in  $\alpha$ 1-antitrypsin deficiency. *Eur Respir J* 2009;33(6):1345-53.

A B C D

**INFORMATION AND CONSENT FORM  
FOR PATIENTS WITH COPD  
(including Sputum assessment)**

**STUDY TITLE:** Observational study in healthy subjects and patients with COPD to assess the relationship between clinical, imaging and biomarker measurements, and progression of emphysema over three years.

**PROTOCOL No.:** 352.2069 FOOTPRINTS™

**SUBJECT No.:** \_\_\_\_\_

**EudraCT No.:** NA

**SPONSOR:** Boehringer Ingelheim Pharma GmbH & Co. KG  
Birkendorfer Straße 65, 88397 Biberach an der Riss, Germany

**STUDY DOCTOR:** Name, address, telephone number

Dear Study Participant,

You are being asked to participate in this observational study because:

- You are a 40 to 70 year old ex-smoker, having quit smoking more than 9 months and you have been diagnosed with Chronic Obstructive Pulmonary Disease (COPD)

Or

- You are a 30 to 70 year old ex-smoker, having quit smoking more than 9 months you have an alpha 1-antitrypsin (A1AT) deficiency phenotype zz and you have been diagnosed with COPD.

This is a 3 year observational study to investigate if there are biomarkers, specific for chronic obstructive pulmonary disease (COPD) and especially emphysema. COPD is a common cause of lung problems and is most often due to smoking. At first, COPD may cause no symptoms or only mild symptoms. As the disease gets worse, symptoms usually become more severe. People with COPD often have symptoms such as cough, abnormal sputum production and shortness of breath, due to narrowing and blockage of the breathing tubes through which air flows in and out of the lungs. Apart from smoking cessation, there is no treatment that can prevent the progression of the disease. Destruction of lung tissue (called emphysema) is a characteristic of COPD involving damage to the air sacs (alveoli) in the lungs which are needed for gas exchange. As a result, the body does not get the oxygen it needs. Many patients with COPD, but not all, develop emphysema at some point. Biomarkers are medical signs, which can be measured, such as blood tests, imaging

# A B C D

and lung tests. Biomarkers identified in this study could contribute to discovery of new drugs for treatment of COPD and associated lung tissue destruction.

Please read the following information carefully. It contains important information to help you decide whether to participate in this research study. The study staff will have a detailed discussion with you to inform you about the study and the possible benefits and risks of your participation. Ask questions about anything that is not clear at any time. You may take home an unsigned copy of this information to think about and discuss with your family, friends or family doctor before you make your decision to participate or not.

After reading and discussing the information you should know:

- Why this research study is being done;
- What will happen during the study;
- Any possible benefits to you;
- The possible risks to you;
- Other options you could choose instead of being in this study;
- How your personal information / health information will be treated during the study and after the study is over, and which data privacy rights you have;
- Whether being in this study could involve any cost to you; and
- What to do if you have problems or questions about this study.

Participation in this study is voluntary (your choice). If you join this study, you can still stop at any time. You have the right not to sign this consent form. If you do not sign, you cannot take part in this research study. If you decide to participate, you will be asked to sign and date at the end of this form.

## PURPOSE OF THE STUDY

The purpose of this study is to evaluate biomarkers correlating to the development and progression of the COPD disease, in particular the emphysema. This study is an observational study. The study does not include administration of any investigational medicinal product and you are allowed to continue and change your standard medication during the study.

COPD is a common disease of lower airways, which significantly affects the quality of life. The disease progresses over time and eventually results in complete disability. Despite major advances in COPD treatment, none of existing drugs can stop the progression of the disease, nor lung tissue destruction (called emphysema), which occurs in every 5th patient with COPD. Also, there are no reliable biological markers (biomarkers) of the disease in sputum and blood, which would allow for earlier recognition of COPD, its progression and response to treatment other than lung function tests. Such biomarkers would also contribute to faster discovery of new drugs for COPD. This study is undertaken to collect data on various biomarkers in induced sputum and blood as well as markers derived from imaging techniques (like chest CT or MRI) in patients with different degrees of COPD and of healthy subjects, who serve as control group. It will also be checked if any of these markers reflect COPD severity or presence or progression of emphysema. This research can lead to the discovery of new diagnostics and medicines and improve the treatment of COPD including associated emphysema in the future.

# A B C D

We estimate that approximately <enter number of participants assigned to your OPU> people will participate in this study in <insert country of OPU> and approximately 455 participants worldwide.

This study has been approved by <insert applicable local authorities, if required, otherwise this statement can be deleted>.

## DESCRIPTION OF THE STUDY

The study is multi-national and involves approximately 12 participating countries. It consists of 2 consecutive periods, a screening and an observational period. The screening period lasts up to 28 days. The observational period lasts 3 years and includes 6 clinic visits and 7 additional phone contacts.

## FLOW CHART OF THE STUDY

| Study Periods                              | Screening Period | Observational Period |    |    |    |    |    |    |    |     |     |     |     |     |  |
|--------------------------------------------|------------------|----------------------|----|----|----|----|----|----|----|-----|-----|-----|-----|-----|--|
|                                            |                  | 2                    | 3  | 4  | ☎  | 5  | ☎  | ☎  | ☎  | 6   | ☎   | ☎   | ☎   | 7   |  |
| Visit                                      | 1                |                      |    |    |    |    |    |    |    |     |     |     |     |     |  |
| Weeks                                      |                  |                      | 12 | 26 | 39 | 52 | 65 | 78 | 91 | 104 | 117 | 130 | 143 | 156 |  |
| Interview MESI Check                       | X                | X                    | X  | X  | X  | X  | X  | X  | X  | X   | X   | X   | X   | X   |  |
| Physical examination & Vital Signs         | X                |                      |    |    |    | X  |    |    |    | X   |     |     |     | X   |  |
| Blood collection for safety and biomarkers | X                | X                    | X  | X  |    | X  |    |    |    | X   |     |     |     | X   |  |
| Urine collection (smoking status)          | X                | X                    | X  | X  |    | X  |    |    |    | X   |     |     |     | X   |  |
| Questionnaires                             | X                | X                    |    |    |    | X  |    |    |    | X   |     |     |     | X   |  |
| Pulse oximetry                             | X                | X                    |    | X  |    | X  |    |    |    | X   |     |     |     | X   |  |
| Lung function testing                      | X                | X                    | X  | X  |    | X  |    |    |    | X   |     |     |     | X   |  |
| Review of the diary                        |                  | X                    | X  | X  | X  | X  | X  | X  | X  | X   | X   | X   | X   | X   |  |
| Chest CT                                   |                  | X                    |    |    |    | X  |    |    |    | X   |     |     |     | X   |  |
| MRI (optional)                             |                  | X                    |    | X  |    | X  |    |    |    | X   |     |     |     | X   |  |
| Induced sputum                             |                  | X                    | X  | X  |    | X  |    |    |    | X   |     |     |     | X   |  |
| Exercise testing (6 MWT)                   | X                | X                    |    |    |    |    |    |    |    | X   |     |     |     | X   |  |

## STUDY PROCEDURES

### Pre-study procedures

Before any study-related procedures are performed, you will be asked to read and sign this consent form to confirm that you wish to participate. The study will be explained to you. You can ask questions and if you agree to take part in the study, you need to sign the consent form.

By signing the Informed Consent you confirm your participation in this study.

Please note, that you are also asked to agree to collection of unspecified blood and sputum samples for biobanking. A biobank is a place where samples are long term stored until they are needed for

# A B C D

further research. This is part of this study. Please read the respective descriptive sections in this document.

## Study procedures taking place at each visit

At each clinic visit or scheduled phone visit

- You will be asked about your overall health and changes in medication.
- Please use your reminder diary and note your respiratory symptoms, hospitalization or doctor's visits and all medication you are taking.

## Study procedures at the screening visit (Visit 1)

- The study will be introduced to you.
- You will be asked for your demographics, such as sex, race, year of birth.
- Your medical and smoking history will be reviewed.
- You will have a complete physical examination, which will include measurements of blood pressure, pulse rate, temperature, weight, and height.
- An electrocardiography (ECG) will be performed. The ECG is a painless test which measures the electrical activity of the heart.
- Blood (approximately 15 ml or 3 teaspoons) will be drawn from a vein in your arm for different laboratory tests, including a genetic test to look whether you have a genetic variation called alpha 1-antitrypsin deficiency (A1ATD). A1ATD is a genetic disorder that causes defective production of alpha 1-antitrypsin (A1AT). There are several forms and degrees of the deficiency. The most common abnormal genes are the S and Z alleles. In this study only patients with the zz-gene mutation can participate. Severe A1ATD can lead to liver disease and emphysema.
- A urine sample will be taken for nicotine testing.
- For all women of child bearing potential a urine pregnancy test will be done.
- You will complete the mMRC (Modified Medical Research Council) questionnaire.
- You will have a lung function test before and after taking salbutamol/albuterol [OPU to adapt locally]. You will be asked to blow hard into the mouthpiece of the measuring device. The test determines how well your lungs work. The procedure will be explained in detail before the test.
- You will have a lung diffusion test called DLCO after taking salbutamol/albuterol [OPU to adapt locally]: this lung diffusion test measures how well the lungs exchange gases. This is an important part of lung function testing, because the major function of the lungs is to allow oxygen to "diffuse" or pass into the blood from the lungs, and to allow carbon dioxide to "diffuse" from the blood into the lungs. You breathe in (inhale) air containing a very small amount of carbon monoxide, a gas existing in the atmosphere but given to you in a higher concentration. You hold your breath for 10 seconds, and then rapidly blow it out (exhale). The exhaled gas is tested to determine how much of the carbon monoxide gas was absorbed during the breath. The remaining gas will easily be eliminated from your body by normal breathing.
- A 6-minutes walking exercise test will be done. You will be asked to walk as far as possible for 6 minutes and the distance will be measured. You will get sufficient time to recover from the walking test.
- Pulse oximetry: this test measures how much oxygen your blood is carrying. By using a small device put on your forefinger your blood oxygen level can be checked.

# A B C D

- You get a reminder diary to write down if your health conditions have gotten worse, if you experienced symptoms and all medication that you are taking.

The results of the tests and/or questions at the screening visit will help the study team to decide whether you can continue in this study. If these tests show that you are eligible to participate, you will be able to continue the study. If you do not meet the eligibility criteria, you will not be able to continue.

Even if you are eligible for the study, your participation cannot be guaranteed. At the moment when the maximum number of subjects who can be included is reached, you will not be able to enter the observational phase of the study.

Visit 1 will last approximately 3 - 4 hours.

You will be scheduled to return for Visit 2 within the next 28 days.

## **Study procedures in the observational period (Visits 2 to 7)**

You will be scheduled to return to the clinic for 6 observational period visits. All visits during the observational period will be scheduled to begin between 06:00 and 09:00 in the mornings. Please come fasted to the visits. Please do not have anything to eat or drink, except water, for 6 hours before the visit. This is very important to get good laboratory measurements.

- First at each visit you will be asked about your medication intake, your diet and life style and your smoking status.
- You will have a complete physical examination, which will include measurements of blood pressure, pulse rate, temperature, weight, and respiratory rate at visits 5, 6 and 7.
- For all women of child bearing potential a urine pregnancy test will be performed at visits 2, 4, 5, 6 and 7.
- You will complete at visits 2, 5, 6 and 7 three questionnaires prior to pulmonary function testing. The questionnaires contain questions about your health, the breathing and COPD status:  
All questionnaires together will take approximately 60 minutes to complete.
- Lung function testing (each performed twice),  $D_{LCO}$  and pulse oximetry will be performed at each clinic visit, except at visit 3.
- Body plethysmography will be performed at each clinic visit, except at visit 3. You sit in a small, airtight room known as a body box. You breathe against a mouthpiece. Clips are put on your nose to shut off your nostrils. As your chest moves while you breathe, it changes the pressure and amount of air in the room and against the mouthpiece. From these changes an accurate measure of the amount of air in your lungs can be determined.
- Between lung function tests salbutamol/albuterol [OPU to adapt locally] will be administered.
- Induced sputum will be collected at each clinic visit. Sputum induction is a procedure to help you cough up secretions from your lungs more easily. The principle is to create extra moisture in the airways of the lungs by inhaling a saline enriched aerosol, which will help loosen the sputum deep in your lungs. The sputum sample will be examined further. In case you are not able to produce an acceptable sputum sample at Visit 2 and at the Visit 2 retest you will continue in the study, but no more sputum induction will be performed in the study.



# A B C D

- Blood samples for safety laboratory testing, and biomarker assessments will be drawn at each clinic visit (about 90 ml or 9 tablespoons).
- A urine sample for nicotine testing will be taken at each clinic visit.
- Your reminder diary will be reviewed at each visit.
- An ECG will be performed at visits 5, 6 and 7.
- A chest computer tomography (CT), a radiologic imaging method, enabling a detailed look into your body, will be performed at visits 2, 5, 6 and 7 between 1h and 4h after salbutamol/albuterol [OPU to adapt locally] administration for the lung function testing.
- The 6-minute walk test will be performed at visits 2, 6 and 7 after the lung function testing.

Visits 2 – 7 will last approximately 4 – 7 hours. Some visit procedures like induced sputum and/or chest CT can be rescheduled to another day (within 14 days of the original visit), e.g. if you have time constraints. In this case you will be administered with salbutamol/albuterol [OPU to adapt locally] prior to the assessment(s).

## Telephone contacts

Additionally, you will have 7 telephone contacts between clinic visits 4, 5, 6 and 7 to follow up and collect information by telephone interviews. Your reminder diary helps you to remember your respiratory symptoms, any COPD exacerbations (COPD flare up with symptoms worsened suddenly), hospitalization or health care visits, and all medication you were taking.

Please remember to inform your study team prior to scheduled telephone interviews in case you have been hospitalized. Telephone calls might take about 30 minutes.

## Study completion

Visit 7 or the discontinuation visit, in case you terminate the study early, will mark the end of the study and you have completed the study.

## Early discontinuation

If you terminate the study during the observational period for any reason, you will be asked to come to the clinic for a discontinuation visit at the time of your next scheduled visit. You will undergo the procedures of this particular visit as outlined in the flowchart. If you do not agree to undergo all procedures of the next scheduled visit, you are asked to do at least the safety assessments.

Women who become pregnant will be discontinued from further study participation and will undergo the procedures for safety assessments like for example blood collection and physical examination.

## Phone calls after early discontinuation

After you have discontinued the study early, the study team will contact you for further follow up, if you agree. You will be asked if you have experienced COPD exacerbations. If your discontinuation takes place between:

Discontinuation date between Visit 2 and 5, three telephone calls:

1. First call: 52 weeks after your Visit 2
2. Second call: 104 weeks after your Visit 2

# A B C D

3. Third call: 156 weeks after Visit 2

Discontinuation date between Visit 5 and 6, two telephone calls:

1. First call: 104 weeks after your Visit 2
2. Second call: 156 weeks after your Visit 2

Discontinuation date between Visit 6 and 7, one telephone call:

1. Call: 156 weeks after Visit 2

## YOUR RESPONSIBILITIES

- While participating in this study, you should not take part in another medication research study. You must tell your study doctor if you have been in another research study in the past 6 weeks or are currently in another research study.
- You must follow the study instructions provided by the study staff, come to all scheduled study visits and be reasonably available for the scheduled telephone visits.
- Prior to and during the lung function assessments you have to stay in in the building where the measurements are performed.
- You must tell the study doctor about all prescription and non-prescription drugs, herbal preparations and food supplements that you are taking or planning to take.
- Please refrain from strenuous activity for at least 12 hours prior to lung function testing, also avoid cold temperatures, environmental smoke, dust or areas with strong odors (e.g. perfumes).
- Please do not donate blood during the observational period of the study.
- You must fast, not have anything to eat or drink, except water, for 6 hours before all study visits.
- You might be asked to provide an additional sputum sample prior to Visit 2 that will be used for quality assurance of sputum processing. This sputum sample will be taken as described above.

## POTENTIAL BENEFITS

This study is an observational study with no change in your usual medication treatment. There will be no direct benefit for you, except for the benefit which derives from the extensive examinations and periodic monitoring of your health or disease status.

## RISKS AND/OR DISCOMFORTS

Your participation in this study requires standard medical procedures which are well known to patients with respiratory diseases. The examinations include procedures like physical examination, blood sampling, ECGs, lung function testing, DLCO measurements, bodyplethysmography, chest CTs and sputum induction.

### Computed tomography

A CT scan will be done at four visits. This is a painless test, a type of X-ray exam, which shows detailed lung structures. You will be asked to strip to the waist and lie on the narrow table that will slide through a hole in the center of the CT scanner. You have to stay still during the procedure

# A B C D

and follow the instructions when to hold your breath. The actual CT scanning takes less than 30 seconds and the entire process is usually completed within 15 minutes.

The scientific unit of measurement for radiation dose is the millisievert (mSv). Chest CT scans involve exposure to radiation equivalent to 20 chest x-rays (approximately 4 millisievert). Although the amount of radiation exposure is higher than a typical x-ray, the risk of harmful effects from a single exam is small. Persons are exposed to radiation from natural sources in the environment all the time. These natural "background" doses vary from area to area. The natural background radiation is 2.4 mSv per year. The additional risk of developing a fatal cancer from a single 4 mSv exposure in a person 50 years old is approximately 1 in 5000 or 0.02%. If it were to occur, it could take many years or decades for you to develop cancer related to this study. The latent period for cancer is estimated to be 6 to 10 years for blood borne cancers (leukemia, lymphoma) and 10 to 25 years for solid organ cancers. Please keep in mind that the risk from all sources of radiation is cumulative over a lifetime.

The chest CT is a very sensitive diagnostic method and reveals lung nodules in approximately 20% of people. The chest CT scan may detect lung abnormalities much earlier than other diagnostic methods, which may be life-saving in subjects at risk of lung cancer (e.g. smokers). Such finding causes anxiety and triggers further diagnostic work-up to confirm or reject malignancy. While an early diagnosis of lung cancer is critical for successful treatment, most lung nodules accidentally found on the chest CT scan turn out to be benign.

## ECG

You may experience skin irritation from the ECG electrode pads or pain when pads are removed.

## Lung function measurement (spirometry and diffusing capacity of the lungs for carbon monoxide)

Risks and discomforts associated with lung function testing may include shortness of breath, dizziness, or headache during the breathing tests. Should this occur, you may receive treatment.

## 6-minute walk test

The 6-minute walk test measures the distance that you can quickly walk on a flat, hard surface in a period of 6 minutes. To prevent any risk to your health you will be constantly supervised by specially trained medical personnel and your health will be monitored. The test may be stopped if you are unable to continue safely in the opinion of the supervising personnel. After the test you will have enough time to recover and to leave the office/clinic in good health.

## Sputum induction

Sputum induction is a painless and safe procedure. Rarely, it may cause transient wheeze or chest tightness. Let your study doctor know immediately if you feel any of these symptoms at any time during the induction procedure. These symptoms could be quickly relieved by inhaling an appropriate drug. The procedure is performed after inhalation of salbutamol/albuterol [OPU to adapt locally] that helps open up the air passages. Side-effects of salbutamol/albuterol [OPU to adapt locally] are rare and further details can be found below.

## Laboratory tests

Blood draw may cause some discomfort or mild pain, as well as redness or bruising at the site of puncture. In rare cases the puncture site can also become infected or nerves may be damaged,

# A B C D

inducing long lasting abnormal sensations (paresthesia), impaired sensation of touch and persistent pain.

A total blood volume of about 500mL will be withdrawn over a period of about 3 years. Approximately 90 mL will be drawn per time point (Visit 2 – 7). The estimated blood loss will not impact your health.

## **Bodyplethysmography**

Some people may feel uncomfortable in the small plethysmography chamber called body box. Tell the study staff if you feel uncomfortable in any way during the test and keep in mind that you can open the door from the inside at any time.

## **Salbutamol/Albuterol [OPU to adapt locally]**

Salbutamol/Albuterol [OPU to adapt locally] is a short-acting bronchodilator used to treat narrowed airways like in asthma or COPD. It is taken by the inhaled route for direct effect on bronchial smooth muscle. In general, salbutamol/albuterol [OPU to adapt locally] is well tolerated even at large doses. In this study, salbutamol/albuterol [OPU to adapt locally] is used only at clinic visit days in combination with some diagnostic tests like PFTs, imaging assessments or induced sputum. It is not administered for the treatment of a disease.

The most common side effects are shaking of fingers, anxiety, headache, muscle cramps, dry mouth, and palpitation (awareness of heart beat). Other symptoms may include increase in heart rate, irregular heartbeat, flushing, myocardial ischemia (reduced blood supply of the heart muscle) (rare), and disturbances of sleep and behavior. Rarely occurring, but of importance, are allergic reactions like unexpected narrowing of the airways (can be life threatening in rare cases), rapid swelling of the facial skin rarely with life threatening breathing difficulties, skin hives with itching and redness, decrease in blood pressure, and collapse. High doses or prolonged use may cause hypokalemia (low levels of potassium in your blood).

## **ALTERNATIVES**

This study is for research purposes only. Your participation is voluntary. The alternative is not to participate in the study.

Please talk to the study doctor about your options before you decide whether you will take part in this study.

## **NEW INFORMATION ABOUT THE STUDY**

During the study, you will be notified of changes to study procedures, which may affect your health or willingness to participate. You may be asked to sign a new consent form that shows that you have been informed of changes.

## **INFORMATION ON BIRTH CONTROL**

You cannot participate in this study if you are pregnant or plan to become pregnant due to the planned radiologic procedures. If you should nevertheless become pregnant or you think you could be pregnant during the study, it is important for you to tell the study doctor or study staff prior to each clinic visit. In case of pregnancy, you will be removed from the study procedures and you will be followed up by phone calls.

# A B C D

## WITHDRAWAL FROM THE STUDY PARTICIPATION

Your participation in this study is voluntary. You may choose to leave this study completely at any time. Your decision will not result in any penalty or loss of benefits to which you are otherwise entitled. Leaving the study will not affect your future medical care.

All data and samples that had already been collected up to the time of withdrawal of your consent, including data and samples gathered at any of your final assessments, will still be used to ensure the correct completion and documentation of the trial and comply with applicable law.

Your study doctor might decide to stop your study participation early without your consent when, in the study doctor's judgment, it is in your best health interest to do so or under certain circumstances listed below:

- Your inability to participate as instructed.
- Study cancellation by the sponsor or [if applicable regulatory authority/EC].
- Or for other unforeseen reasons that make it necessary to stop your participation in the study.

If you are removed from the study, the study doctor will explain to you why you were removed.

## CONFIDENTIALITY / PRIVACY AND DATA SHARING

### Use of your personally identifiable information

The part of your personal information that directly identifies you such as your name, address, or birth date will remain at the study site and can be accessed by the study doctor and other people at the site who are assisting with the study or your care. This information may also be checked at the study site by the

- sponsor, or the sponsor's representatives (including monitors hired by the sponsor through a service provider),
- ethics review board/committee that reviewed the ethical aspects of this study, and/or
- [Please adapt or delete if not applicable] domestic or foreign regulatory agencies such as the U.S. Food and Drug Administration (FDA) and European Medicines Agency (EMA) that approve medicines.

These persons check that the study is carried out correctly at the study site. They are bound by a duty of confidentiality.

### Use of your coded data

Your personally identifiable information and health information collected for the purpose of the study as well as the samples will be labelled with a unique code number. Coded data may also include data/information such as images (e.g. CTs/MRTs). The code number will be used in place of your name and other information that directly and easily identifies you, for example, address and birth date. Only the study site will have the link between your personal information and the coded data. This link will not be provided to the sponsor; only your coded data such as medical data, biomarker data, images and all other information collected in the study will be sent to the sponsor and/or contractors of the sponsor. The sponsor and/or contractors of the sponsor will take measures to protect the confidentiality and security of your coded data and your privacy in accordance with current law.

# A B C D

The sponsor and other members of the Boehringer Ingelheim Group of Companies and those working with them such as their associates, collaborators, research partners, assignees, licensees and designees, and its/their affiliated companies and agents, and other individuals and organizations, may use your coded data for the following purposes:

- Keep it electronically and analyze it to understand the study and the study results;
- Share it with domestic or foreign regulatory agencies worldwide such as the U.S. Food and Drug Administration (FDA) and European Medicines Agency (EMA), that approve medicines;
- Share it with ethics review boards/committees worldwide, or steering committee that checks whether the study was run properly.
- Analyse it to improve the quality of this study and other clinical trials

The coded data may be transferred within your country or to other countries for analysis. Where the data protection rules in other countries are not as strict as the rules in your country, the sponsor will adopt appropriate measures to provide an adequate level of protection according to EU law.

## Use of anonymized data for additional research

Anonymized data refers to data from which the subject cannot be identified by the recipient of the information. Anonymizing data is one of the strongest safeguards for the protection of subjects' identity.

The sponsor may give scientists and medical researchers in other companies, research organizations, or academic institutions access to anonymized data for further research and education beyond the disease investigated in this study. This may include research looking into improving patient care or quality and efficiency in conducting clinical studies in general. Details on the anonymization and data sharing process are set forth in the Boehringer Ingelheim "Policy on Transparency and Publication of Clinical Study Data" available at: <http://trials.boehringer-ingelheim.com>.

## Information and correction rights

You have the right to review which personal data the trial site and sponsor store about you. You can also request that incorrect personal data is corrected or that processing is restricted. You can request a copy of the contractual safeguards implementing adequate protection of personal data if your data is shared outside the EU/EEA.

In order to exercise your rights please contact the study site [if applicable: and its data protection officer (ADD EMAIL)] who will align with the sponsor. You can also ask to receive the personal information you have provided for the study in a standardized electronic format or to have them transmitted to another person of your choice. You can also contact your local data protection authority in case of questions or concerns about the handling of your personal data. In some cases, your rights can be limited under applicable laws, especially where they conflict with the conduct of the study and mandatory archiving requirements. In this case you will be informed accordingly.

If you have signed an Information and Consent Form for the optional DNA banking sample, all the information provided in this form under section "Confidentiality / Privacy and Data Sharing" your rights under data protection laws and the information on how to exercise them applies as well to the optional DNA banking consent form.

# A B C D

## Clinical study websites and publication

A description of this clinical study will be available on <http://www.clinicaltrials.gov>, as required by U.S. Law. This web site will not include information that can identify you. At most, the web site will include a summary of the results. You can search this web site at any time.

The results of the study will be published on Boehringer Ingelheim's study web site (<http://trials.boehringer-ingelheim.com>) and may also appear in other clinical study/study registries in countries in which the study is conducted. The results will not include information that can identify you.

The results of the study may also be published in a professional journal or presented at scientific meetings. Your identity will not be disclosed in those presentations.

## USE OF SAMPLES IN THIS STUDY

Blood and sputum will be collected for pre-specified as well as for unspecified analyses. Urine samples will also be collected. All samples collected during the study as described under the section "Study Procedures" will be coded and sent to the central laboratory (except pregnancy test). A part of the analyses will be done at the central laboratory. In addition, samples will be further distributed to Boehringer Ingelheim and contractors of Boehringer Ingelheim for analyses.

### Urine samples

Urine samples will be collected from all patients for the purpose of nicotine testing and (if applicable) additionally for pregnancy testing in women. Pregnancy testing will be done at the site and the sample will be discarded right after testing. Urine samples for nicotine testing will be shipped to and analyzed by the central laboratory and neither kept nor used for any future analyses.

### Pre-specified biomarker assessment

The pre-specified analyses done in blood samples comprise safety laboratory testing, testing of A1ATD and biomarker assessment. Pre-specified biomarkers will also be analysed in sputum samples. All blood and sputum samples will be collected to gain a better understanding of COPD and the influence of A1ATD. Those biomarkers include but are not limited to markers of inflammation and tissue destruction, which have been reported and/or hypothesized to be indicative of physiological and pathophysiological changes in the lungs. In addition investigations aiming at identification of new biomarkers will be done.

The DNA sample used to determine A1ATD and left over of other biomarker samples for prespecified analyses will be destroyed once this analysis has been completed.

Left over sputum samples that were not used for the pre-specified biomarker analyses will be transferred to the biobank (see section "Unspecified biomarker assessment").

### Unspecified biomarker assessment (Biobanking)

Since knowledge in the biomarker field is steadily increasing, we also ask you to consent to the collection of samples for unspecified biomarker analyses. These samples including left over sputum samples described above will be stored up to 15 years after the final study report has been written to enable these additional explorative investigations

# A B C D

1  
2  
3  
4  
5  
6 Approximately 50 ml blood will be collected per visit during the observational period. All analyses  
7 aim at increasing our understanding of COPD and other respiratory diseases. This may help to  
8 develop new therapies for COPD in the future. Samples will be sent to Boehringer Ingelheim or a  
9 storage CRO for long term storage.  
10

11 The future research on your samples will not affect your present medical care. Reports from any  
12 future research with your samples and data will not be given to you or your doctor. Summaries of  
13 the research results may be published in scientific journals, on the internet, in data repositories or  
14 presented at meetings for other researchers, so that other doctors and researchers can find out about  
15 the results. In any case, your identity will not be disclosed in any publications or presentations.  
16 Subjects who donate her/his samples to BI do not retain any property rights to the materials such  
17 as samples and their derivatives and the related data.  
18  
19  
20  
21  
22  
23  
24  
25  
26  
27  
28  
29  
30  
31  
32  
33  
34  
35  
36  
37  
38  
39  
40  
41  
42  
43  
44  
45  
46  
47  
48  
49  
50  
51  
52  
53  
54  
55  
56  
57  
58  
59



# A B C D

## COMPENSATION / COSTS

[Amend in accordance with local legal requirements or insurance.]

This study is funded by the sponsor. The sponsor has signed a contract with <insert CRO, applicable> to conduct this study. The sponsor <CRO on behalf of CRO> will pay the study doctor's and/or institution's for his/her expenses, time and effort to conduct this study. The study doctor and the institution/Hospital have no other financials ties to Boehringer Ingelheim.

There will be no additional costs to you for your participation in this study. All study procedures including lab work, tests, and doctor visits are provided to you free of charge by the sponsor, Boehringer Ingelheim, and will not be billed to you or your insurance carrier as long as you are participating in the study. You will receive <enter amount and/or a description of a payment schedule> to cover out-of-pocket expenses such as meals and parking for visits that are required as part of the study.

The sponsor will be owner of the study results. If commercial products or other valuable discoveries result from research using your samples and/or data, these products and discoveries may be owned, patented, licensed, or otherwise developed for commercial sale by sponsor, other researchers, or companies. If this should occur, you will not receive any financial benefits or compensation or other proprietary interest from any commercial products or discoveries that may result from such research.

## INJURY

You will receive necessary medical treatment in the event that an injury results because of your participation in this study. Financial compensation for lost wages, disability or discomfort due to an injury is not generally available. You do not give up any legal rights by signing this form. You do not release the sponsor, institution, study doctor or their agents from any liability for negligence by signing this form.

## EMERGENCY CONTACT / ETHICS CONTACT

If you have questions concerning the conduct of the study, or for any other reason you may contact Dr. \_\_\_\_\_ at \_\_\_\_\_ or the Study Coordinator \_\_\_\_\_ at \_\_\_\_\_.

In case of an emergency, please go to the nearest hospital emergency department and inform your study doctor as soon as possible.

If you have any questions about your rights as a study subject, please contact your family doctor, lawyer, or write to the committee that reviewed the ethical aspects of this study at: <insert ethics committee name and contact here>

# A B C D

## DECLARATION OF INFORMED CONSENT

**STUDY SUBJECT No.:** \_\_\_\_\_

My signature on this consent form means that:

- I understand that I am being asked to participate in a research study entitled: Observational study in healthy subjects and patients with COPD to assess the relationship between clinical, imaging and biomarker measurements, and progression of emphysema over three years.
- I have had this study explained to me by \_\_\_\_\_.
- I have read each page of this document.
- I have had all of my questions answered fully and to my satisfaction.
- I was given sufficient time to think in peace and quiet and decide whether to participate.
- I have been told that my participation is voluntary and I can withdraw at any time without giving any reasons.
- I agree to the collection, storage, processing, transfer and use of my personal data and biological samples (blood, urine and sputum) as explained in the above information.
- I agree that blood will be collected for biobanking and will be used for future unspecified analyses.
- I agree that left over of my sputum samples can be stored for future unspecified analyses.
- I agree that further, today unspecified analysis of my biological samples can be done during and after the study.
- I hereby expressly declare and agree that I transfer all rights of ownership of the collected samples and sample-related data to Boehringer Ingelheim Pharma (GmbH & Co. KG) so that the same may use them as described in this Informed Consent Form.
- I voluntarily consent to participate in this study.
- I will be given a signed copy of this consent document for my records

It is important that your personal doctor is aware that you are in a research study because you are undergoing examinations that could affect your health. With your permission, we will notify him/her that you are taking part in this study.

I consent to my personal doctor being notified that I am taking part in this study.

YES, I agree.                       NO, I don't agree.

I agree that in case I discontinue the study early, the study team can contact me as described above, for further follow up by telephone.

YES, I agree.                       NO, I don't agree to be contacted after early discontinuation.

## A B C D

I consent that in case I die during the time of this study my study doctor is allowed to contact my family members to ask after the circumstances and that he can review my relevant medical records.

YES

NO

\_\_\_\_\_  
**Name of Study Participant**  
*(please print)*

\_\_\_\_\_  
**Consent Signature of Study Participant**

\_\_\_\_\_  
**Date**  
 (dd mmm yyyy)

\_\_\_\_\_  
**Name of Person Obtaining Consent**  
*(please print)*

\_\_\_\_\_  
**Signature of Person Obtaining Consent**

\_\_\_\_\_  
**Date**  
 (dd mmm yyyy)

#### STATEMENT OF INVESTIGATOR / STUDY DOCTOR:

I certify that I have explained to the above individual(s) the nature and purpose of the study and the possible benefit and risks associated with participation. I have answered any questions that have been raised and the potential study participant has received a copy of this signed consent document.

I acknowledge my responsibility for the care and well-being of the above study participant, to respect the rights and wishes of the participant, and to conduct the study according to applicable Good Clinical Practice guidelines and regulations.

\_\_\_\_\_  
**Investigator Name**  
*(please print)*

\_\_\_\_\_  
**Investigator Signature**

\_\_\_\_\_  
**Date**  
 (dd mmm yyyy)

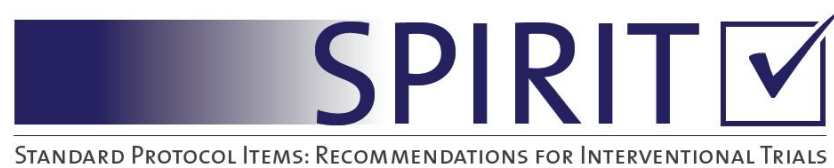

SPIRIT 2013 Checklist: Recommended items to address in a clinical trial protocol and related documents\*

| Section/item                      | ItemNo | Description                                                                                                  | Reported on page number (section)                                                                              |
|-----------------------------------|--------|--------------------------------------------------------------------------------------------------------------|----------------------------------------------------------------------------------------------------------------|
| <b>Administrative information</b> |        |                                                                                                              |                                                                                                                |
| Title                             | 1      | Descriptive title identifying the study design, population, interventions, and, if applicable, trial acronym | 1                                                                                                              |
| Trial registration                | 2a     | Trial identifier and registry name. If not yet registered, name of intended registry                         | 3 (Abstract: Introduction).                                                                                    |
|                                   | 2b     | All items from the World Health Organization Trial Registration Data Set                                     | Please see table on pages 10–15.                                                                               |
| Protocol version                  | 3      | Date and version identifier                                                                                  | 7 (Introduction).                                                                                              |
| Funding                           | 4      | Sources and types of financial, material, and other support                                                  | 22 (Acknowledgements); 23 (Funding of study).                                                                  |
| Roles and responsibilities        | 5a     | Names, affiliations, and roles of protocol contributors                                                      | 22 (Competing Interests); 23 (Authors' contributions); 38 (Supplementary Table 4. Steering committee members). |
|                                   | 5b     | Name and contact information for the trial sponsor                                                           | 23 (Funding of study).                                                                                         |

1  
2  
3  
4  
5  
6  
7  
8  
9  
10  
11  
12  
13  
14  
15  
16  
17  
18  
19  
20  
21  
22  
23  
24  
25  
26  
27  
28  
29  
30  
31  
32  
33  
34  
35  
36  
37  
38  
39  
40  
41  
42  
43  
44  
45  
46

|                          |    |                                                                                                                                                                                                                                                                                          |                                                                                                                                                                                                                   |
|--------------------------|----|------------------------------------------------------------------------------------------------------------------------------------------------------------------------------------------------------------------------------------------------------------------------------------------|-------------------------------------------------------------------------------------------------------------------------------------------------------------------------------------------------------------------|
|                          | 5c | Role of study sponsor and funders, if any, in study design; collection, management, analysis, and interpretation of data; writing of the report; and the decision to submit the report for publication, including whether they will have ultimate authority over any of these activities | 23 (Authors' contributions).                                                                                                                                                                                      |
|                          | 5d | Composition, roles, and responsibilities of the coordinating centre, steering committee, endpoint adjudication committee, data management team, and other individuals or groups overseeing the trial, if applicable (see Item 21a for data monitoring committee)                         | 14 (Information on steering committee); 14/15 (Data collection and management); 23 (Authors' contributions); 38 (Supplementary Table 4. Steering committee members).                                              |
| <b>Introduction</b>      |    |                                                                                                                                                                                                                                                                                          |                                                                                                                                                                                                                   |
| Background and rationale | 6a | Description of research question and justification for undertaking the trial, including summary of relevant studies (published and unpublished) examining benefits and harms for each intervention                                                                                       | 7 (Introduction); 8 (Objectives); summary of interventions is not applicable for this observational biomarker study.                                                                                              |
|                          | 6b | Explanation for choice of comparators                                                                                                                                                                                                                                                    | Not applicable for this observational biomarker study.                                                                                                                                                            |
| Objectives               | 7  | Specific objectives or hypotheses                                                                                                                                                                                                                                                        | 8 (Objectives).                                                                                                                                                                                                   |
| Trial design             | 8  | Description of trial design including type of trial (eg, parallel group, crossover, factorial, single group), allocation ratio, and framework (eg, superiority, equivalence, noninferiority, exploratory)                                                                                | 8/9 (Study design); 11 (Patient population and recruitment); 28 (Figure 1. Overview of trial design); 29 (Table 1. FOOTPRINTS study participants); 32/33 (Supplementary Text 1) – describes study as exploratory. |

## Methods: Participants, interventions, and outcomes

|    |                      |     |                                                                                                                                                                                                |                                                                                                                                                                          |
|----|----------------------|-----|------------------------------------------------------------------------------------------------------------------------------------------------------------------------------------------------|--------------------------------------------------------------------------------------------------------------------------------------------------------------------------|
| 1  |                      |     |                                                                                                                                                                                                |                                                                                                                                                                          |
| 2  |                      |     |                                                                                                                                                                                                |                                                                                                                                                                          |
| 3  |                      |     |                                                                                                                                                                                                |                                                                                                                                                                          |
| 4  | Study setting        | 9   | Description of study settings (eg, community clinic, academic hospital) and list of countries where data will be collected. Reference to where list of study sites can be obtained             | 8–9 (Study design).                                                                                                                                                      |
| 5  |                      |     |                                                                                                                                                                                                |                                                                                                                                                                          |
| 6  |                      |     |                                                                                                                                                                                                |                                                                                                                                                                          |
| 7  |                      |     |                                                                                                                                                                                                |                                                                                                                                                                          |
| 8  |                      |     |                                                                                                                                                                                                |                                                                                                                                                                          |
| 9  | Eligibility criteria | 10  | Inclusion and exclusion criteria for participants. If applicable, eligibility criteria for study centres and individuals who will perform the interventions (eg, surgeons, psychotherapists)   | 9–11 (Inclusion and exclusion criteria).                                                                                                                                 |
| 10 |                      |     |                                                                                                                                                                                                |                                                                                                                                                                          |
| 11 |                      |     |                                                                                                                                                                                                |                                                                                                                                                                          |
| 12 |                      |     |                                                                                                                                                                                                |                                                                                                                                                                          |
| 13 |                      |     |                                                                                                                                                                                                |                                                                                                                                                                          |
| 14 |                      |     |                                                                                                                                                                                                |                                                                                                                                                                          |
| 15 | Interventions        | 11a | Interventions for each group with sufficient detail to allow replication, including how and when they will be administered                                                                     | Not applicable as study was observational biomarker study. Planned analyses and assessments are detailed on pages 11–12.                                                 |
| 16 |                      |     |                                                                                                                                                                                                |                                                                                                                                                                          |
| 17 |                      |     |                                                                                                                                                                                                |                                                                                                                                                                          |
| 18 |                      |     |                                                                                                                                                                                                |                                                                                                                                                                          |
| 19 |                      |     |                                                                                                                                                                                                |                                                                                                                                                                          |
| 20 |                      | 11b | Criteria for discontinuing or modifying allocated interventions for a given trial participant (eg, drug dose change in response to harms, participant request, or improving/worsening disease) | Not applicable as an observational biomarker study. Details on study discontinuation are provided on page 9 (Study design) and rescheduling of clinic visits on page 13. |
| 21 |                      |     |                                                                                                                                                                                                |                                                                                                                                                                          |
| 22 |                      |     |                                                                                                                                                                                                |                                                                                                                                                                          |
| 23 |                      |     |                                                                                                                                                                                                |                                                                                                                                                                          |
| 24 |                      |     |                                                                                                                                                                                                |                                                                                                                                                                          |
| 25 |                      | 11c | Strategies to improve adherence to intervention protocols, and any procedures for monitoring adherence (eg, drug tablet return, laboratory tests)                                              | Not applicable. Further details provided on page 14–15 on registering clinic visits and phone calls are provided in the “data collection and management” section.        |
| 26 |                      |     |                                                                                                                                                                                                |                                                                                                                                                                          |
| 27 |                      |     |                                                                                                                                                                                                |                                                                                                                                                                          |
| 28 |                      |     |                                                                                                                                                                                                |                                                                                                                                                                          |
| 29 |                      |     |                                                                                                                                                                                                |                                                                                                                                                                          |
| 30 |                      | 11d | Relevant concomitant care and interventions that are permitted or prohibited during the trial                                                                                                  | 36/37 (Supplementary Table 3. Overview of permitted and restricted medications/therapy).                                                                                 |
| 31 |                      |     |                                                                                                                                                                                                |                                                                                                                                                                          |
| 32 |                      |     |                                                                                                                                                                                                |                                                                                                                                                                          |
| 33 |                      |     |                                                                                                                                                                                                |                                                                                                                                                                          |
| 34 |                      |     |                                                                                                                                                                                                |                                                                                                                                                                          |
| 35 |                      |     |                                                                                                                                                                                                |                                                                                                                                                                          |
| 36 |                      |     |                                                                                                                                                                                                |                                                                                                                                                                          |
| 37 |                      |     |                                                                                                                                                                                                |                                                                                                                                                                          |
| 38 |                      |     |                                                                                                                                                                                                |                                                                                                                                                                          |
| 39 |                      |     |                                                                                                                                                                                                |                                                                                                                                                                          |
| 40 |                      |     |                                                                                                                                                                                                |                                                                                                                                                                          |
| 41 |                      |     |                                                                                                                                                                                                |                                                                                                                                                                          |
| 42 |                      |     |                                                                                                                                                                                                |                                                                                                                                                                          |
| 43 |                      |     |                                                                                                                                                                                                |                                                                                                                                                                          |
| 44 |                      |     |                                                                                                                                                                                                |                                                                                                                                                                          |
| 45 |                      |     |                                                                                                                                                                                                |                                                                                                                                                                          |
| 46 |                      |     |                                                                                                                                                                                                |                                                                                                                                                                          |

1  
2  
3  
4  
5  
6  
7  
8  
9  
10  
11  
12  
13  
14  
15  
16  
17  
18  
19  
20  
21  
22  
23  
24  
25  
26  
27  
28  
29  
30  
31  
32  
33  
34  
35  
36  
37  
38  
39  
40  
41  
42  
43  
44  
45  
46

|                      |    |                                                                                                                                                                                                                                                                                                                                                                                |                                                                                      |
|----------------------|----|--------------------------------------------------------------------------------------------------------------------------------------------------------------------------------------------------------------------------------------------------------------------------------------------------------------------------------------------------------------------------------|--------------------------------------------------------------------------------------|
| Outcomes             | 12 | Primary, secondary, and other outcomes, including the specific measurement variable (eg, systolic blood pressure), analysis metric (eg, change from baseline, final value, time to event), method of aggregation (eg, median, proportion), and time point for each outcome. Explanation of the clinical relevance of chosen efficacy and harm outcomes is strongly recommended | 8 (Objectives); 11 (Main outcome measures); 11–12 Planned analyses and assessments); |
| Participant timeline | 13 | Time schedule of enrolment, interventions (including any run-ins and washouts), assessments, and visits for participants. A schematic diagram is highly recommended (see Figure)                                                                                                                                                                                               | 9 (Study design); 28 (Figure 1. Overview of trial design);                           |
| Sample size          | 14 | Estimated number of participants needed to achieve study objectives and how it was determined, including clinical and statistical assumptions supporting any sample size calculations                                                                                                                                                                                          | 32 (Supplementary text 1); 34 (Supplementary Table 1); 35 (Supplementary Table 2)    |
| Recruitment          | 15 | Strategies for achieving adequate participant enrolment to reach target sample size                                                                                                                                                                                                                                                                                            | 32/33 (Supplementary Text 1)                                                         |

**Methods: Assignment of interventions (for controlled trials)**

Allocation:

|                     |     |                                                                                                                                                                                                                                                                                                                                                          |                                                 |
|---------------------|-----|----------------------------------------------------------------------------------------------------------------------------------------------------------------------------------------------------------------------------------------------------------------------------------------------------------------------------------------------------------|-------------------------------------------------|
| Sequence generation | 16a | Method of generating the allocation sequence (eg, computer-generated random numbers), and list of any factors for stratification. To reduce predictability of a random sequence, details of any planned restriction (eg, blocking) should be provided in a separate document that is unavailable to those who enrol participants or assign interventions | Not applicable (observational biomarker study). |
|---------------------|-----|----------------------------------------------------------------------------------------------------------------------------------------------------------------------------------------------------------------------------------------------------------------------------------------------------------------------------------------------------------|-------------------------------------------------|

1  
2  
3  
4  
5  
6  
7  
8  
9  
10  
11  
12  
13  
14  
15  
16  
17  
18  
19  
20  
21  
22  
23  
24  
25  
26  
27  
28  
29  
30  
31  
32  
33  
34  
35  
36  
37  
38  
39  
40  
41  
42  
43  
44  
45  
46

|                                                           |     |                                                                                                                                                                                                                                                                                                                                                                                                              |                                                                                                                             |
|-----------------------------------------------------------|-----|--------------------------------------------------------------------------------------------------------------------------------------------------------------------------------------------------------------------------------------------------------------------------------------------------------------------------------------------------------------------------------------------------------------|-----------------------------------------------------------------------------------------------------------------------------|
| Allocation concealment mechanism                          | 16b | Mechanism of implementing the allocation sequence (eg, central telephone; sequentially numbered, opaque, sealed envelopes), describing any steps to conceal the sequence until interventions are assigned                                                                                                                                                                                                    | Not applicable.                                                                                                             |
| Implementation                                            | 16c | Who will generate the allocation sequence, who will enrol participants, and who will assign participants to interventions                                                                                                                                                                                                                                                                                    | Not applicable.                                                                                                             |
| Blinding (masking)                                        | 17a | Who will be blinded after assignment to interventions (eg, trial participants, care providers, outcome assessors, data analysts), and how                                                                                                                                                                                                                                                                    | Not applicable.                                                                                                             |
|                                                           | 17b | If blinded, circumstances under which unblinding is permissible, and procedure for revealing a participant's allocated intervention during the trial                                                                                                                                                                                                                                                         | Not applicable.                                                                                                             |
| <b>Methods: Data collection, management, and analysis</b> |     |                                                                                                                                                                                                                                                                                                                                                                                                              |                                                                                                                             |
| Data collection methods                                   | 18a | Plans for assessment and collection of outcome, baseline, and other trial data, including any related processes to promote data quality (eg, duplicate measurements, training of assessors) and a description of study instruments (eg, questionnaires, laboratory tests) along with their reliability and validity, if known. Reference to where data collection forms can be found, if not in the protocol | 14/15 (Data collection and management); 39/40 (Supplementary Table 5. CT scan protocol in inspiration and expiration)       |
|                                                           | 18b | Plans to promote participant retention and complete follow-up, including list of any outcome data to be collected for participants who discontinue or deviate from intervention protocols                                                                                                                                                                                                                    | 9 (Study design) provides information on discontinuation; 13 (Rescheduling of clinic visits); 32/33 (Supplementary text 1). |



1  
2  
3  
4  
5  
6  
7  
8  
9  
10  
11  
12  
13  
14  
15  
16  
17  
18  
19  
20  
21  
22  
23  
24  
25  
26  
27  
28  
29  
30  
31  
32  
33  
34  
35  
36  
37  
38  
39  
40  
41  
42  
43  
44  
45  
46

|                            |     |                                                                                                                                                                                                                                                                                                                                       |                                                                                                                                          |
|----------------------------|-----|---------------------------------------------------------------------------------------------------------------------------------------------------------------------------------------------------------------------------------------------------------------------------------------------------------------------------------------|------------------------------------------------------------------------------------------------------------------------------------------|
| Data management            | 19  | Plans for data entry, coding, security, and storage, including any related processes to promote data quality (eg, double data entry; range checks for data values). Reference to where details of data management procedures can be found, if not in the protocol                                                                     | 14/15 (Data collection and management)                                                                                                   |
| Statistical methods        | 20a | Statistical methods for analysing primary and secondary outcomes. Reference to where other details of the statistical analysis plan can be found, if not in the protocol                                                                                                                                                              | 13 (Statistical analysis)                                                                                                                |
|                            | 20b | Methods for any additional analyses (eg, subgroup and adjusted analyses)                                                                                                                                                                                                                                                              | 13 (Statistical analysis)                                                                                                                |
|                            | 20c | Definition of analysis population relating to protocol non-adherence (eg, as randomised analysis), and any statistical methods to handle missing data (eg, multiple imputation)                                                                                                                                                       | Note, analysis population will be described in future publications.<br>15 (Data collection and management) for handling of missing data. |
| <b>Methods: Monitoring</b> |     |                                                                                                                                                                                                                                                                                                                                       |                                                                                                                                          |
| Data monitoring            | 21a | Composition of data monitoring committee (DMC); summary of its role and reporting structure; statement of whether it is independent from the sponsor and competing interests; and reference to where further details about its charter can be found, if not in the protocol. Alternatively, an explanation of why a DMC is not needed | No DMC was implemented for the FOOTPRINTS study, as it is a non-interventional, purely observational biomarker study.                    |

|    |                                 |     |                                                                                                                                                                                                                                           |
|----|---------------------------------|-----|-------------------------------------------------------------------------------------------------------------------------------------------------------------------------------------------------------------------------------------------|
| 1  |                                 |     |                                                                                                                                                                                                                                           |
| 2  |                                 |     |                                                                                                                                                                                                                                           |
| 3  |                                 |     |                                                                                                                                                                                                                                           |
| 4  |                                 | 21b | Description of any interim analyses and stopping guidelines, including who will have access to these interim results and make the final decision to terminate the trial                                                                   |
| 5  |                                 |     | 13 (Statistical analysis); details on stopping guidelines are not applicable for this study (observational biomarker study) and access to study results is generally not restricted to a dedicated group since there are no blinded data. |
| 6  |                                 |     |                                                                                                                                                                                                                                           |
| 7  |                                 |     |                                                                                                                                                                                                                                           |
| 8  |                                 |     |                                                                                                                                                                                                                                           |
| 9  |                                 |     |                                                                                                                                                                                                                                           |
| 10 | Harms                           | 22  | Plans for collecting, assessing, reporting, and managing solicited and spontaneously reported adverse events and other unintended effects of trial interventions or trial conduct                                                         |
| 11 |                                 |     | 12 (Planned analyses and assessments)                                                                                                                                                                                                     |
| 12 |                                 |     |                                                                                                                                                                                                                                           |
| 13 |                                 |     |                                                                                                                                                                                                                                           |
| 14 |                                 |     |                                                                                                                                                                                                                                           |
| 15 |                                 |     |                                                                                                                                                                                                                                           |
| 16 | Auditing                        | 23  | Frequency and procedures for auditing trial conduct, if any, and whether the process will be independent from investigators and the sponsor                                                                                               |
| 17 |                                 |     | 15 (Data collection and management)                                                                                                                                                                                                       |
| 18 |                                 |     |                                                                                                                                                                                                                                           |
| 19 |                                 |     |                                                                                                                                                                                                                                           |
| 20 |                                 |     |                                                                                                                                                                                                                                           |
| 21 | <b>Ethics and dissemination</b> |     |                                                                                                                                                                                                                                           |
| 22 |                                 |     |                                                                                                                                                                                                                                           |
| 23 | Research ethics approval        | 24  | Plans for seeking research ethics committee/institutional review board (REC/IRB) approval                                                                                                                                                 |
| 24 |                                 |     | 4 (Ethics and dissemination); 16 (ETHICS APPROVAL AND CONSENT TO PARTICIPATE)                                                                                                                                                             |
| 25 |                                 |     |                                                                                                                                                                                                                                           |
| 26 |                                 |     |                                                                                                                                                                                                                                           |
| 27 | Protocol amendments             | 25  | Plans for communicating important protocol modifications (eg, changes to eligibility criteria, outcomes, analyses) to relevant parties (eg, investigators, REC/IRBs, trial participants, trial registries, journals, regulators)          |
| 28 |                                 |     | 16 (ETHICS APPROVAL AND CONSENT TO PARTICIPATE).                                                                                                                                                                                          |
| 29 |                                 |     |                                                                                                                                                                                                                                           |
| 30 |                                 |     |                                                                                                                                                                                                                                           |
| 31 |                                 |     |                                                                                                                                                                                                                                           |
| 32 |                                 |     |                                                                                                                                                                                                                                           |
| 33 |                                 |     |                                                                                                                                                                                                                                           |
| 34 | Consent or assent               | 26a | Who will obtain informed consent or assent from potential trial participants or authorised surrogates, and how (see Item 32)                                                                                                              |
| 35 |                                 |     | 4 (Ethics and dissemination); 9/10 (Inclusion and exclusion criteria)                                                                                                                                                                     |
| 36 |                                 |     |                                                                                                                                                                                                                                           |
| 37 |                                 |     |                                                                                                                                                                                                                                           |
| 38 |                                 |     |                                                                                                                                                                                                                                           |
| 39 |                                 |     |                                                                                                                                                                                                                                           |
| 40 |                                 |     |                                                                                                                                                                                                                                           |
| 41 |                                 |     |                                                                                                                                                                                                                                           |
| 42 |                                 |     |                                                                                                                                                                                                                                           |
| 43 |                                 |     |                                                                                                                                                                                                                                           |
| 44 |                                 |     |                                                                                                                                                                                                                                           |
| 45 |                                 |     |                                                                                                                                                                                                                                           |
| 46 |                                 |     |                                                                                                                                                                                                                                           |

1  
2  
3  
4  
5  
6  
7  
8  
9  
10  
11  
12  
13  
14  
15  
16  
17  
18  
19  
20  
21  
22  
23  
24  
25  
26  
27  
28  
29  
30  
31  
32  
33  
34  
35  
36  
37  
38  
39  
40  
41  
42  
43  
44  
45  
46

|                               |     |                                                                                                                                                                                                                                                                                     |                                                                                                                                                                     |
|-------------------------------|-----|-------------------------------------------------------------------------------------------------------------------------------------------------------------------------------------------------------------------------------------------------------------------------------------|---------------------------------------------------------------------------------------------------------------------------------------------------------------------|
|                               | 26b | Additional consent provisions for collection and use of participant data and biological specimens in ancillary studies, if applicable                                                                                                                                               | Not applicable.                                                                                                                                                     |
| Confidentiality               | 27  | How personal information about potential and enrolled participants will be collected, shared, and maintained in order to protect confidentiality before, during, and after the trial                                                                                                | 15/16 (Data collection and management)                                                                                                                              |
| Declaration of interests      | 28  | Financial and other competing interests for principal investigators for the overall trial and each study site                                                                                                                                                                       | 22 (Competing interests); Financial disclosure is not a prerequisite for this type of study, so this information was not collected for all principal investigators. |
| Access to data                | 29  | Statement of who will have access to the final trial dataset, and disclosure of contractual agreements that limit such access for investigators                                                                                                                                     | 21 (Discussion)                                                                                                                                                     |
| Ancillary and post-trial care | 30  | Provisions, if any, for ancillary and post-trial care, and for compensation to those who suffer harm from trial participation                                                                                                                                                       | Not applicable (observational biomarker study)                                                                                                                      |
| Dissemination policy          | 31a | Plans for investigators and sponsor to communicate trial results to participants, healthcare professionals, the public, and other relevant groups (eg, via publication, reporting in results databases, or other data sharing arrangements), including any publication restrictions | 21 (Discussion)                                                                                                                                                     |
|                               | 31b | Authorship eligibility guidelines and any intended use of professional writers                                                                                                                                                                                                      | 22 (Acknowledgments); 23 (AUTHORS' CONTRIBUTIONS)                                                                                                                   |

1  
2  
3  
4  
5  
6  
7  
8  
9  
10  
11  
12  
13  
14  
15  
16  
17  
18  
19  
20  
21  
22  
23  
24  
25  
26  
27  
28  
29  
30  
31  
32  
33  
34  
35  
36  
37  
38  
39  
40  
41  
42  
43  
44  
45  
46

|  |     |                                                                                                                 |                 |
|--|-----|-----------------------------------------------------------------------------------------------------------------|-----------------|
|  | 31c | Plans, if any, for granting public access to the full protocol, participant-level dataset, and statistical code | 21 (Discussion) |
|--|-----|-----------------------------------------------------------------------------------------------------------------|-----------------|

## Appendices

|                            |    |                                                                                                                                                                                                |                                                                                                                     |
|----------------------------|----|------------------------------------------------------------------------------------------------------------------------------------------------------------------------------------------------|---------------------------------------------------------------------------------------------------------------------|
| Informed consent materials | 32 | Model consent form and other related documentation given to participants and authorised surrogates                                                                                             | Provided in the Supplementary. Described on page 4 (Ethics and dissemination); 9 (Inclusion and exclusion criteria) |
| Biological specimens       | 33 | Plans for collection, laboratory evaluation, and storage of biological specimens for genetic or molecular analysis in the current trial and for future use in ancillary studies, if applicable | 14/15 (Data collection and management)                                                                              |

---

\*It is strongly recommended that this checklist be read in conjunction with the SPIRIT 2013 Explanation & Elaboration for important clarification on the items. Amendments to the protocol should be tracked and dated. The SPIRIT checklist is copyrighted by the SPIRIT Group under the Creative Commons "[Attribution-NonCommercial-NoDerivs 3.0 Unported](https://creativecommons.org/licenses/by-nc-nd/3.0/)" license.

| WHO Trial Registration Data Set (Version 1.3.1)                                                                                                                                                                                                                                                                                                                                                                                                                                                                                                                                                                                                                                                                                                                                                                                                                                                                                                     | Reported on page number (section) |
|-----------------------------------------------------------------------------------------------------------------------------------------------------------------------------------------------------------------------------------------------------------------------------------------------------------------------------------------------------------------------------------------------------------------------------------------------------------------------------------------------------------------------------------------------------------------------------------------------------------------------------------------------------------------------------------------------------------------------------------------------------------------------------------------------------------------------------------------------------------------------------------------------------------------------------------------------------|-----------------------------------|
| <p><b>1. Primary Registry and Trial Identifying Number</b><br/>Name of Primary Registry, and the unique ID number assigned by the Primary Registry to this trial.</p>                                                                                                                                                                                                                                                                                                                                                                                                                                                                                                                                                                                                                                                                                                                                                                               | 3 (Abstract).                     |
| <p><b>2. Date of Registration in Primary Registry</b><br/>Date when trial was officially registered in the Primary Registry.</p>                                                                                                                                                                                                                                                                                                                                                                                                                                                                                                                                                                                                                                                                                                                                                                                                                    | 9 (Study design).                 |
| <p><b>3. Secondary Identifying Numbers</b><br/>Other identifiers besides the Trial Identifying Number allocated by the Primary Registry, if any. These include:</p> <ul style="list-style-type: none"> <li>- The Universal Trial Number (UTN)</li> <li>- Identifiers assigned by the sponsor (record Sponsor name and Sponsor-issued trial number (e.g. protocol number))</li> <li>- Other trial registration numbers issued by other Registries (both Primary and Partner Registries in the WHO Registry Network, and other registries)</li> <li>- Identifiers issued by funding bodies, collaborative research groups, regulatory authorities, ethics committees / institutional review boards, etc.</li> <li>- All secondary identifiers will have 2 elements: an identifier for the issuing authority (e.g. NCT, ISRCTN, ACTRN) plus a number.</li> </ul> <p>There is no limit to the number of secondary identifiers that can be provided.</p> | 3 (Abstract).                     |
| <p><b>4. Source(s) of Monetary or Material Support</b><br/>Major source(s) of monetary or material support for the trial (e.g. funding agency, foundation, company, institution).</p>                                                                                                                                                                                                                                                                                                                                                                                                                                                                                                                                                                                                                                                                                                                                                               | 23 (FUNDING OF STUDY).            |
| <p><b>5. Primary Sponsor</b><br/>The individual, organization, group or other legal entity which takes responsibility for initiating, managing and/or financing a study. The Primary Sponsor is responsible for ensuring that the trial is properly registered. The Primary Sponsor may or may not be the main</p>                                                                                                                                                                                                                                                                                                                                                                                                                                                                                                                                                                                                                                  | 23 (FUNDING OF STUDY).            |

|                                                                                                                                                                                                                                                                                                                                                                                                                                                                                                                                                                                                                                                                                |                                                  |
|--------------------------------------------------------------------------------------------------------------------------------------------------------------------------------------------------------------------------------------------------------------------------------------------------------------------------------------------------------------------------------------------------------------------------------------------------------------------------------------------------------------------------------------------------------------------------------------------------------------------------------------------------------------------------------|--------------------------------------------------|
| funder.                                                                                                                                                                                                                                                                                                                                                                                                                                                                                                                                                                                                                                                                        |                                                  |
| <p><b>6. Secondary Sponsor(s)</b><br/>Additional individuals, organizations or other legal persons, if any, that have agreed with the primary sponsor to take on responsibilities of sponsorship.</p> <p>A secondary sponsor may have agreed to:</p> <ul style="list-style-type: none"> <li>- take on all the responsibilities of sponsorship jointly with the primary sponsor; or form a group with the Primary Sponsor in which the responsibilities of sponsorship are allocated among the members of the group; or act as the Primary Sponsor's legal representative in relation to some or all of the trial sites.</li> </ul>                                             | Not applicable.                                  |
| <p><b>7. Contact for Public Queries</b><br/>Email address, telephone number and postal address of the contact who will respond to general queries, including information about current recruitment status.</p> <p>“Note: The information provided in here is functional and not personal, it is recommended to provide institutional and not personal information. By providing this information the registrant consents that the information provided can or may be published on a public website. Once provided the information cannot be redacted or anonymized as a result of new privacy legislation such as the European General Data Protection Regulation (GDPR)”.</p> | 2 (Corresponding author); 23 (FUNDING OF STUDY). |
| <p><b>8. Contact for Scientific Queries</b><br/>There must be clearly assigned responsibility for scientific leadership to a named Principal Investigator. The PI may delegate responsibility for dealing with scientific enquiries to a scientific contact for the trial. This scientific contact will be listed in addition to the PI.</p>                                                                                                                                                                                                                                                                                                                                   | 2 (Corresponding author); 23 (FUNDING OF STUDY). |

|                                                                                                                                                                                                                                                                                                                                                                                                                                                                                                                                                                                                                                                                                                                                                                                                                                                                                                                                                                                                                 |                                                |
|-----------------------------------------------------------------------------------------------------------------------------------------------------------------------------------------------------------------------------------------------------------------------------------------------------------------------------------------------------------------------------------------------------------------------------------------------------------------------------------------------------------------------------------------------------------------------------------------------------------------------------------------------------------------------------------------------------------------------------------------------------------------------------------------------------------------------------------------------------------------------------------------------------------------------------------------------------------------------------------------------------------------|------------------------------------------------|
| <p>“Note: The information provided in here is functional and not personal, it is recommended to provide institutional and not personal information. By providing this information the registrant consents that the information provided can or may be published on a public website. Once provided the information cannot be redacted or anonymized as a result of new privacy legislation such as the European General Data Protection Regulation (GDPR)”.</p> <p>The contact for scientific queries must include:<br/> Name and title, email address, telephone number, postal address and affiliation of the Principal Investigator, and;<br/> Email address, telephone number, postal address and affiliation of the contact for scientific queries about the trial (if applicable).<br/> The details for the scientific contact may be generic (that is, there does not need to be a named individual): e.g. a generic email address for research team members qualified to answer scientific queries.</p> |                                                |
| <p><b>9. Public Title</b><br/> Title intended for the lay public in easily understood language.</p>                                                                                                                                                                                                                                                                                                                                                                                                                                                                                                                                                                                                                                                                                                                                                                                                                                                                                                             | <p>‘FOOTPRINTS’ study included throughout.</p> |
| <p><b>10. Scientific Title</b><br/> Scientific title of the study as it appears in the protocol submitted for funding and ethical review. Include trial acronym if available.</p>                                                                                                                                                                                                                                                                                                                                                                                                                                                                                                                                                                                                                                                                                                                                                                                                                               | <p>‘FOOTPRINTS’ study included throughout.</p> |
| <p><b>11. Countries of Recruitment</b><br/> The countries from which participants will be, are intended to be, or have been recruited at the time of registration.</p>                                                                                                                                                                                                                                                                                                                                                                                                                                                                                                                                                                                                                                                                                                                                                                                                                                          | <p>9 (Study design).</p>                       |
| <p><b>12. Health Condition(s) or Problem(s) Studied</b><br/> Primary health condition(s) or problem(s) studied (e.g., depression, breast cancer, medication error).</p> <p>If the study is conducted in healthy human volunteers belonging to the target population of the intervention (e.g. preventive or screening</p>                                                                                                                                                                                                                                                                                                                                                                                                                                                                                                                                                                                                                                                                                       | <p>6–7 (Introduction); 8 (Objectives).</p>     |

|                                                                                                                                                                                                                                                                                                                                                                                                                                                                       |                                                                                                                          |
|-----------------------------------------------------------------------------------------------------------------------------------------------------------------------------------------------------------------------------------------------------------------------------------------------------------------------------------------------------------------------------------------------------------------------------------------------------------------------|--------------------------------------------------------------------------------------------------------------------------|
| <p>interventions), enter the particular health condition(s) or problem(s) being prevented.</p>                                                                                                                                                                                                                                                                                                                                                                        |                                                                                                                          |
| <p><b>13. Intervention(s)</b><br/>For each arm of the trial record a brief intervention name plus an intervention description.</p>                                                                                                                                                                                                                                                                                                                                    | <p>Not applicable as observational biomarker study.</p>                                                                  |
| <p><b>14. Key Inclusion and Exclusion Criteria</b><br/>Inclusion and exclusion criteria for participant selection, including age and sex. Other selection criteria may relate to clinical diagnosis and co-morbid conditions; exclusion criteria are often used to ensure patient safety.</p> <p>If the study is conducted in healthy human volunteers not belonging to the target population (e.g. a preliminary safety study), enter "healthy human volunteer".</p> | <p>9–10 (Inclusion and exclusion criteria).</p>                                                                          |
| <p><b>15. Study Type</b></p>                                                                                                                                                                                                                                                                                                                                                                                                                                          | <p>9 (Study design).</p>                                                                                                 |
| <p><b>16. Date of First Enrollment</b><br/>Anticipated or actual date of enrolment of the first participant.</p>                                                                                                                                                                                                                                                                                                                                                      | <p>11 (Patient population and recruitment).</p>                                                                          |
| <p><b>17. Sample Size</b><br/>Sample Size consists of:<br/>Number of participants that the trial plans to enrol in total.<br/>Number of participants that the trial has enrolled.</p>                                                                                                                                                                                                                                                                                 | <p>32/33 (Supplementary Text 1)<br/>29 (Table 1. FOOTPRINTS® study participants: all enrolled subjects)</p>              |
| <p><b>18. Recruitment Status</b></p>                                                                                                                                                                                                                                                                                                                                                                                                                                  | <p>11 (Patient population and recruitment).</p>                                                                          |
| <p><b>19. Primary Outcome(s)</b><br/>Outcomes are events, variables, or experiences that are measured because it is believed that they may be influenced by the intervention.</p> <p>The Primary Outcome should be the outcome used in sample size</p>                                                                                                                                                                                                                | <p>8 (Objectives); 11–12 (Planned analyses and assessments) details specifics on measurement methods and timepoints.</p> |



|                                                                                                                                                                                                                                                                                                                                                                                                                                                                                                                                                                                   |                                                                                                                                                                                                                                                                                                                                     |
|-----------------------------------------------------------------------------------------------------------------------------------------------------------------------------------------------------------------------------------------------------------------------------------------------------------------------------------------------------------------------------------------------------------------------------------------------------------------------------------------------------------------------------------------------------------------------------------|-------------------------------------------------------------------------------------------------------------------------------------------------------------------------------------------------------------------------------------------------------------------------------------------------------------------------------------|
| <p>calculations, or the main outcome(s) used to determine the effects of the intervention(s). Most trials should have only one primary outcome.</p> <p>For each primary outcome provide:<br/> The name of the outcome (do not use abbreviations)<br/> The metric or method of measurement used (be as specific as possible)<br/> The timepoint(s) of primary interest</p>                                                                                                                                                                                                         |                                                                                                                                                                                                                                                                                                                                     |
| <p><b>20. Key Secondary Outcomes</b><br/> Secondary outcomes are outcomes which are of secondary interest or that are measured at timepoints of secondary interest. A secondary outcome may involve the same event, variable, or experience as the primary outcome, but measured at timepoints other than those of primary interest.</p> <p>As for primary outcomes, for each secondary outcome provide:<br/> The name of the outcome (do not use abbreviations)<br/> The metric or method of measurement used (be as specific as possible)<br/> The timepoint(s) of interest</p> | 8 (Objectives); 11–12 (Planned analyses and assessments) details specifics on measurement methods and timepoints.                                                                                                                                                                                                                   |
| <p><b>21. Ethics Review</b><br/> The ethics review process information of the trial record in the primary register database. It consists of:<br/> Status (possible values: Not approved, Approved, Not Available)<br/> Date of approval<br/> Name and contact details of Ethics committee(s)</p>                                                                                                                                                                                                                                                                                  | 16 (ETHICS APPROVAL AND CONSENT TO PARTICIPATE);<br>Trial record can be found at<br><a href="https://clinicaltrials.gov/ct2/show/NCT02719184">https://clinicaltrials.gov/ct2/show/NCT02719184</a> ;<br>List of ethics committees (name/contact details) provided for purposes of submission (not to be included in the publication) |
| <p><b>22. Completion date</b><br/> Date of study completion: The date on which the final data for a clinical study were collected (commonly referred to as, "last subject, last visit").</p>                                                                                                                                                                                                                                                                                                                                                                                      | 11 (Patient population and recruitment).                                                                                                                                                                                                                                                                                            |
| <p><b>23. Summary Results</b><br/> It consists of:</p>                                                                                                                                                                                                                                                                                                                                                                                                                                                                                                                            | Not applicable – trial ongoing.                                                                                                                                                                                                                                                                                                     |

|                                                                                                                                                                                                                                                                                                                                                                                                                                                                                                                                                                                                                                                                                                                                                                                                                                                                                                                                                                                                                                                                                                                                                                                                                                                                                                                                                                                                                                                                                                                                                                                              |                         |
|----------------------------------------------------------------------------------------------------------------------------------------------------------------------------------------------------------------------------------------------------------------------------------------------------------------------------------------------------------------------------------------------------------------------------------------------------------------------------------------------------------------------------------------------------------------------------------------------------------------------------------------------------------------------------------------------------------------------------------------------------------------------------------------------------------------------------------------------------------------------------------------------------------------------------------------------------------------------------------------------------------------------------------------------------------------------------------------------------------------------------------------------------------------------------------------------------------------------------------------------------------------------------------------------------------------------------------------------------------------------------------------------------------------------------------------------------------------------------------------------------------------------------------------------------------------------------------------------|-------------------------|
| <p>1<br/>2<br/>3<br/>4<br/>5<br/>6<br/>7<br/>8<br/>9<br/>10<br/>11<br/>12<br/>13<br/>14<br/>15<br/>16<br/>17<br/>18<br/>19<br/>20<br/>21<br/>22<br/>23<br/>24<br/>25<br/>26<br/>27</p> <p>Date of posting of results summaries<br/>Date of the first journal publication of results<br/>URL hyperlink(s) related to results and publications<br/>Baseline Characteristics: Data collected at the beginning of a clinical study for all participants and for each arm or comparison group. These data include demographics, such as age and sex, and study-specific measures.<br/>Participant flow: Information to document the progress and numbers of research participants through each stage of a study in a flow diagram or tabular format.<br/>Adverse events: An unfavorable change in the health of a participant, including abnormal laboratory findings, and all serious adverse events and deaths that happen during a clinical study or within a certain time period after the study has ended. This change may or may not be caused by the intervention being studied.<br/>Outcome measures: A table of data for each primary and secondary outcome measure and their respective measurement of precision (eg a 95% confidence interval) by arm (that is, initial assignment of participants to arms or groups) or comparison group (that is, analysis groups), including the result(s) of scientifically appropriate statistical analyses that were performed on the outcome measure data, if any.<br/>URL link to protocol file(s) with version and date<br/>Brief summary</p> |                         |
| <p>28<br/>29<br/>30<br/>31<br/>32<br/>33<br/>34<br/>35<br/>36<br/>37</p> <p><b>24. IPD sharing statement</b><br/>Statement regarding the intended sharing of deidentified individual clinical trial participant-level data (IPD). Should indicate whether or not IPD will be shared, what IPD will be shared, when, by what mechanism, with whom and for what types of analyses. It consists of:<br/>Plan to share IPD (Yes, No)<br/>Plan description</p>                                                                                                                                                                                                                                                                                                                                                                                                                                                                                                                                                                                                                                                                                                                                                                                                                                                                                                                                                                                                                                                                                                                                    | <p>21 (Discussion).</p> |
