# Supplementary material for: FOOTPRINTS study protocol: rationale and methodology of a 3-year longitudinal observational study to phenotype patients with COPD
Source: PubMed Central journal article supplement — BMJ Open. 2021 Mar 22;11(3):e042526. doi: 10.1136/bmjopen-2020-042526 (PMC7986686; doi:10.1136/bmjopen-2020-042526), 2021-03-22
Supplement: bmjopen-2020-042526supp001.pdf [file bmjopen-2020-042526supp001.pdf]

**Supplementary text 1. Participant enrolment and retention, sample size calculation, and power calculations for annual decline in forced expiratory volume in 1 second and 15th percentile density assessed by CT**

To achieve adequate participant enrolment, a recruitment plan was set up prior to the start of recruitment; this detailed the number of subjects expected at each site across the different study populations, and was based on feedback during site feasibility assessments. This plan was monitored constantly during the recruitment phase to track planned versus actual enrolment numbers. Local approaches to facilitate recruitment, such as advertising, were also used. To promote participant retention, a comprehensive strategy was set up during the course of the study. This included maintaining frequent contact with study participants (especially from Visits 5 to 7, where visits are 1 year apart), for example via phonecalls and greetings cards, as well as awareness training for site staff.

As this study is exploratory in nature, sample size calculations are focused on achieving the desired precision for biomarker estimates and relevant clinical assessments in all COPD patient groups except for the A1ATD group. This study planned to enrol 125 patients with mild COPD, 125 with moderate COPD and 125 with severe COPD – by assuming a  $\leq 20\%$  dropout rate after 3 years, at least 100 subjects per group are expected to contribute to the analysis by the end of the study period.

For annual decline in forced expiratory volume in 1 second (FEV<sub>1</sub>), available information reports standard deviations (SDs) ranging from about 20 mL/year [1] to 60 mL/year.[2] Using this information and considering a planned 100 subjects in each group, supplementary table 1 reports the coverage probability for the half-width of a 95% confidence interval (CI) for annual FEV<sub>1</sub> decline for a given SD. For

example, if the observed SD is 50 mL/year, and the true half-width of the CI is 11 mL/year, with 100 subjects, the probability that the observed CI covers the true CI is 93.8%. The reported SD on annual decline in 15th percentile density (PD15) ranges from 3.4 g/L [3] to 5.5 g/L.[4] Using the same assumptions as for FEV<sub>1</sub> decline, we report the coverage probability of a true CI for a given SD and half-width of the CI for 100 subjects (supplementary table 2).

In addition, with 100 subjects in each group, and allowing for up to 15 covariates, a partial Pearson correlation coefficient of 0.30 can be declared significant with 80% power between any two continuous variables (e.g. FEV<sub>1</sub> and a new biomarker) within the group.

**Supplementary table 1. Study sites**

| <b>Study site and address</b>                                                                                                    |
|----------------------------------------------------------------------------------------------------------------------------------|
| <b>United States, Alabama</b>                                                                                                    |
| University of Alabama at Birmingham<br>Birmingham, Alabama, United States, 35294                                                 |
| <b>United States, California</b>                                                                                                 |
| University of California San Diego<br>San Diego, California, United States, 92103-8415                                           |
| The Lundquist Institute for Biomedical Innovation at<br>Harbor-UCLA Medical Center<br>Torrance, California, United States, 90502 |
| <b>United States, Colorado</b>                                                                                                   |
| National Jewish Health<br>Denver, Colorado, United States, 80206                                                                 |
| <b>United States, Iowa</b>                                                                                                       |
| University of Iowa Hospitals and Clinics<br>Iowa City, Iowa, United States, 52242                                                |
| <b>United States, Maryland</b>                                                                                                   |
| Johns Hopkins University<br>Baltimore, Maryland, United States, 21224                                                            |
| <b>United States, Massachusetts</b>                                                                                              |
| Brigham and Women's Hospital<br>Boston, Massachusetts, United States, 02115                                                      |

| <b>Study site and address</b>                                                                |
|----------------------------------------------------------------------------------------------|
| <b>United States, Pennsylvania</b>                                                           |
| Temple University Hospital<br>Philadelphia, Pennsylvania, United States, 19140               |
| <b>United States, Texas</b>                                                                  |
| Baylor College of Medicine<br>Houston, Texas, United States, 77030                           |
| Diagnostics Research Group<br>San Antonio, Texas, United States, 78229                       |
| <b>United States, Utah</b>                                                                   |
| University of Utah Health Sciences Center<br>Salt Lake City, Utah, United States, 84108      |
| <b>Belgium</b>                                                                               |
| Brussels – UNIV St-Pierre<br>Brussels, Belgium, 1000                                         |
| UZ Leuven<br>Leuven, Belgium, 3000                                                           |
| <b>Canada, Alberta</b>                                                                       |
| University of Alberta Hospital (University of Alberta)<br>Edmonton, Alberta, Canada, T6G 1Z1 |
| <b>Canada, Ontario</b>                                                                       |
| Saint Joseph's Healthcare<br>Hamilton, Ontario, Canada, L8N 4A6                              |
| McMaster University Medical Centre<br>Hamilton, Ontario, Canada, L8N 4K1                     |

| <b>Study site and address</b>                                               |
|-----------------------------------------------------------------------------|
| <b>Canada, Quebec</b>                                                       |
| McGill University Health Centre (MUHC)<br>Montreal, Quebec, Canada, H4A 3J1 |
| <b>Canada, Saskatchewan</b>                                                 |
| Royal University Hospital<br>Saskatoon, Saskatchewan, Canada, S7N 0W8       |
| <b>Canada</b>                                                               |
| IUCPQ (Laval University)<br>Quebec, Canada, G1V 4G5                         |
| <b>Denmark</b>                                                              |
| Aarhus University Hospital, Skejby<br>Aarhus N, Denmark, 8200               |
| Gentofte Hospital<br>Hellerup, Denmark, 2900                                |
| Hvidovre Hospital<br>Hvidovre, Denmark, 2650                                |
| <b>Finland</b>                                                              |
| HYKS Keuhkosairauksien tutkimusyksikkö<br>Helsinki, Finland, 00029          |
| TYKS, Keuhkosairauksien klinikka, Turku<br>Turku, Finland, 20520            |
| <b>Germany</b>                                                              |
| IKF Pneumologie GmbH & Co. KG<br>Frankfurt, Germany, 60596                  |

| <b>Study site and address</b>                                                                                 |
|---------------------------------------------------------------------------------------------------------------|
| Pneumologisches Forschungsinstitut an der LungenClinic<br>Grosshansdorf GmbH<br>Grosshansdorf, Germany, 22927 |
| Fraunhofer ITEM<br>Hannover, Germany, 30625                                                                   |
| KLB Gesundheitsforschung Lübeck GmbH<br>Lübeck, Germany, 23552                                                |
| <b>Japan</b>                                                                                                  |
| Kagoshima University Medical And Dental Hospital<br>Kagoshima, Kagoshima, Japan, 890-8520                     |
| Showa University Fujigaoka Hospital<br>Kanagawa, Yokohama, Japan, 227-8501                                    |
| Kishiwada City Hospital<br>Osaka, Kishiwada, Japan, 596-8501                                                  |
| Osaka City University Hospital<br>Osaka, Osaka, Japan, 545-8586                                               |
| Showa University Hospital<br>Tokyo, Shinagawa-ku, Japan, 142-8666                                             |
| <b>Republic of Korea</b>                                                                                      |
| Konkuk University Medical Center<br>Seoul, Republic of Korea, 05030                                           |
| SMG-SNU Boramae Medical Center<br>Seoul, Republic of Korea, 07061                                             |
| Korea University Guro Hospital<br>Seoul, Republic of Korea, 08308                                             |

| <b>Study site and address</b>                                                                      |
|----------------------------------------------------------------------------------------------------|
| The Catholic University of Korea, Eunpyeong St. Mary's Hospital<br>Seoul, Republic of Korea, 22711 |
| <b>Poland</b>                                                                                      |
| Respiratory Medicine Centre, private prac., Bialystok<br>Bialystok, Poland, 15044                  |
| University Clinical Center, Gdansk<br>Gdansk, Poland, 80 952                                       |
| Institute of Tuberculosis & Lung Disease, Warsaw<br>Warsaw, Poland, 01138                          |
| <b>Spain</b>                                                                                       |
| Hospital del Mar<br>Barcelona, Spain, 08003                                                        |
| Hospital Vall d'Hebron<br>Barcelona, Spain, 08035                                                  |
| Hospital Clínic de Barcelona<br>Barcelona, Spain, 08036                                            |
| Hospital de Bellvitge<br>L'Hospitalet de Llobregat, Spain, 08907                                   |
| Hospital Son Espases<br>Palma de Mallorca, Spain, 07010                                            |
| Hospital Quirónsalud Madrid<br>Pozuelo de Alarcón, Spain, 28223                                    |
| <b>Sweden</b>                                                                                      |
| Skånes universitetssjukhus, Lund<br>Lund, Sweden, 221 85                                           |

| <b>Study site and address</b>                                    |
|------------------------------------------------------------------|
| <b>United Kingdom</b>                                            |
| Queen Elizabeth Hospital<br>Birmingham, United Kingdom, B15 2GW  |
| Glenfield Hospital<br>Leicester, United Kingdom, LE3 9QP         |
| Royal Free Hospital<br>London, United Kingdom, NW3 2PF           |
| Medicines Evaluation Unit<br>Manchester, United Kingdom, M23 9QZ |



**Supplementary table 2. Coverage probability of 95% CIs for FEV<sub>1</sub> annual decline based on 100 subjects**

| SD | Half-width of a 95% CI |        |        |        |        |        |        |        |        |        |
|----|------------------------|--------|--------|--------|--------|--------|--------|--------|--------|--------|
|    | 6                      | 7      | 8      | 9      | 10     | 11     | 12     | 13     | 14     | 15     |
| 25 | 0.998                  | >0.999 | >0.999 | >0.999 | >0.999 | >0.999 | >0.999 | >0.999 | >0.999 | >0.999 |
| 30 | 0.557                  | 0.993  | >0.999 | >0.999 | >0.999 | >0.999 | >0.999 | >0.999 | >0.999 | >0.999 |
| 35 | 0.026                  | 0.557  | 0.983  | >0.999 | >0.999 | >0.999 | >0.999 | >0.999 | >0.999 | >0.999 |
| 40 | <0.001                 | 0.048  | 0.557  | 0.97   | >0.999 | >0.999 | >0.999 | >0.999 | >0.999 | >0.999 |
| 45 | <0.001                 | <0.001 | 0.072  | 0.557  | 0.954  | >0.999 | >0.999 | >0.999 | >0.999 | >0.999 |
| 50 | <0.001                 | <0.001 | 0.003  | 0.097  | 0.557  | 0.938  | 0.998  | >0.999 | >0.999 | >0.999 |
| 55 | <0.001                 | <0.001 | <0.001 | 0.006  | 0.122  | 0.557  | 0.921  | 0.996  | >0.999 | >0.999 |
| 60 | <0.001                 | <0.001 | <0.001 | <0.001 | 0.011  | 0.146  | 0.557  | 0.905  | 0.993  | >0.999 |
| 65 | <0.001                 | <0.001 | <0.001 | <0.001 | <0.001 | 0.018  | 0.168  | 0.557  | 0.889  | 0.988  |
| 70 | <0.001                 | <0.001 | <0.001 | <0.001 | <0.001 | 0.001  | 0.026  | 0.189  | 0.557  | 0.873  |

CI, confidence interval; FEV<sub>1</sub>, forced expiratory volume in 1 second; SD, standard deviation.

**Supplementary table 3. Coverage probability of 95% CIs for PD15 annual decline based on 100 subjects**

| SD  | Half-width of a 95% CI |        |        |        |        |        |        |        |        |        |        |
|-----|------------------------|--------|--------|--------|--------|--------|--------|--------|--------|--------|--------|
|     | 0.55                   | 0.60   | 0.65   | 0.70   | 0.75   | 0.80   | 0.85   | 0.90   | 0.95   | 1.00   | 1.05   |
| 2.5 | 0.938                  | 0.998  | >0.999 | >0.999 | >0.999 | >0.999 | >0.999 | >0.999 | >0.999 | >0.999 | >0.999 |
| 3.0 | 0.146                  | 0.557  | 0.905  | 0.993  | >0.999 | >0.999 | >0.999 | >0.999 | >0.999 | >0.999 | >0.999 |
| 3.5 | 0.001                  | 0.026  | 0.189  | 0.557  | 0.873  | 0.983  | 0.999  | >0.999 | >0.999 | >0.999 | >0.999 |
| 4.0 | <0.001                 | <0.001 | 0.005  | 0.048  | 0.226  | 0.557  | 0.846  | 0.970  | 0.997  | >0.999 | >0.999 |
| 4.5 | <0.001                 | <0.001 | <0.001 | <0.001 | 0.011  | 0.072  | 0.257  | 0.557  | 0.822  | 0.954  | 0.993  |
| 5.0 | <0.001                 | <0.001 | <0.001 | <0.001 | <0.001 | 0.003  | 0.021  | 0.097  | 0.284  | 0.557  | 0.801  |
| 5.5 | <0.001                 | <0.001 | <0.001 | <0.001 | <0.001 | <0.001 | <0.001 | 0.006  | 0.033  | 0.122  | 0.306  |
| 6.0 | <0.001                 | <0.001 | <0.001 | <0.001 | <0.001 | <0.001 | <0.001 | <0.001 | 0.002  | 0.011  | 0.048  |

CI, confidence interval; PD15, lung density at the 15<sup>th</sup> percentile point of the CT histogram; SD, standard deviation.

**Supplementary table 4. Overview of permitted and restricted medications/therapy**

| <b>Drug class</b>                   | <b>Prior to Visit 1</b>     | <b>Between Visits 1 and 2</b>           | <b>Observational period</b> |
|-------------------------------------|-----------------------------|-----------------------------------------|-----------------------------|
| Corticosteroid – nasal/ocular       | Permitted                   | Permitted                               | Permitted                   |
| Corticosteroid – oral, inhaled*     | Permitted <sup>†</sup>      | Permitted<br>(stable dose) <sup>‡</sup> | Permitted                   |
| Corticosteroid – i.v., i.m.         | Permitted <sup>†</sup>      | Not permitted <sup>‡</sup>              | Permitted                   |
| SABA – inhaled <sup>§</sup>         | Permitted <sup>†</sup>      | Permitted<br>(stable dose) <sup>‡</sup> | Permitted                   |
| LABA – inhaled <sup>§</sup>         | Permitted <sup>†</sup>      | Permitted<br>(stable dose) <sup>‡</sup> | Permitted                   |
| SAMA – inhaled                      | Permitted <sup>†</sup>      | Permitted<br>(stable dose) <sup>‡</sup> | Permitted                   |
| LAMA – inhaled <sup>§</sup>         | Permitted <sup>†</sup>      | Permitted<br>(stable dose) <sup>‡</sup> | Permitted                   |
| Leukotriene modifier                | Permitted <sup>†</sup>      | Permitted<br>(stable dose) <sup>‡</sup> | Permitted                   |
| Cromolyn sodium / nedocromil sodium | Permitted <sup>†</sup>      | Permitted<br>(stable dose) <sup>‡</sup> | Permitted                   |
| Methylxanthines                     | Not permitted <sup>  </sup> | Not permitted                           | Permitted                   |
| PDE-4 inhibitors                    | Not permitted <sup>  </sup> | Not permitted                           | Permitted                   |

|                                                 |                             |               |               |
|-------------------------------------------------|-----------------------------|---------------|---------------|
| Immunomodulators (e.g. methotrexate)            | Not permitted <sup>  </sup> | Not permitted | Permitted     |
| Immunotherapy (e.g. subcutaneous or sublingual) | Permitted <sup>†</sup>      | Permitted     | Permitted     |
| Biologic antagonists (e.g. omalizumab)          | Not permitted <sup>  </sup> | Not permitted | Not permitted |
| A1AT augmentation therapy                       | Not permitted               | Not permitted | Permitted     |
| Other investigational drugs                     | Not permitted               | Not permitted | Not permitted |

\*For patients taking stable maintenance OCS with a total daily dose of  $\leq 20$  mg prednisone or equivalent.

<sup>†</sup>Allowed as stable dose for at least 4 weeks before Visit 1.

<sup>‡</sup>If unstable (e.g. in case of exacerbations), extend screening period.

<sup>§</sup>Includes fixed dose combination therapy.

<sup>||</sup>Allowed before Visit 1 with a washout period of 3 months or 6 half-lives whichever is greater.

A1AT, alpha1-antitrypsin; LABA, long-acting  $\beta 2$ -adrenergic agonist; LAMA, long-acting anticholinergic; OCS, oral corticosteroids; PDE-4, phosphodiesterase-4; SABA, short-acting  $\beta 2$ -adrenergic agonist; SAMA, short-acting anticholinergic.

**Supplementary table 5. Steering committee members**

| <b>Scientific expert</b> | <b>Affiliation</b>                                                                     | <b>Role</b>              |
|--------------------------|----------------------------------------------------------------------------------------|--------------------------|
| Prof. James Crapo        | National Jewish Health, Denver (CO), USA                                               | Chair/Advisor/Discussant |
| Prof. David Lynch        | National Jewish Health, Denver (CO), USA                                               | Advisor/Discussant       |
| Dr. Henrik Watz          | Pulmonary Research Institute, Lungen Clinic Grosshansdorf GmbH, Grosshansdorf, Germany | Advisor/Discussant       |
| Prof. Pascal Chanez      | CHU Marseille – Hôpital Nord, Marseille, France                                        | Advisor/Discussant       |
| Prof. Gaetan Deslee      | CHU Reims – Hôpital Maison Blanche, Reims, France                                      | Advisor/Discussant       |
| Dr. Alice Turner         | Centre for Translational Inflammation Research, Birmingham, UK                         | Advisor/Discussant       |
| Dr. Richard Casaburi     | Los Angeles Biomedical Research Institute, Torrance (CA), USA                          | Advisor/Discussant       |
| Prof. Kazuhisa Asai      | Osaka University Graduate School of Medicine, Osaka, Japan                             | Advisor/Discussant       |
| Dr. Harald Koegler       | Boehringer Ingelheim                                                                   | Medical Project Lead     |
| Dr. Markus Beck          | Boehringer Ingelheim                                                                   | Participant/Discussant   |
| Dr. Claudia Diefenbach   | Boehringer Ingelheim                                                                   | Participant/Discussant   |
| Dr. Frank Risse          | Boehringer Ingelheim                                                                   | Participant/Discussant   |
| Dr Abhya Gupta           | Boehringer Ingelheim                                                                   | Participant/Discussant   |

**Supplementary table 6. CT scan protocol in inspiration and expiration**

|                        |                                                                                                                                                                                                                                                                                |
|------------------------|--------------------------------------------------------------------------------------------------------------------------------------------------------------------------------------------------------------------------------------------------------------------------------|
| Scan coverage          | Lung apices to costophrenic recesses                                                                                                                                                                                                                                           |
| Scanning mode          | Helical                                                                                                                                                                                                                                                                        |
| Scanning plane         | Axial                                                                                                                                                                                                                                                                          |
| Dose modulation        | On                                                                                                                                                                                                                                                                             |
| Detector configuration | 64 x 0.625 mm (GE VCT Discovery STE, VCT Discovery 750HD 64 slice)<br>64 x 0.5 mm (Philips Brilliance 64 slice)<br>(64)32 x 0.6 mm (Siemens Definition DS, Sensation 64 slice)<br>(128)64 x 0.6 mm (Siemens Definition Edge, AS+ 128 slice, Flash 128 slice, Somatom Force)    |
| kVp                    | 120 kVp                                                                                                                                                                                                                                                                        |
| mA/mAs                 | GE (750HD, Discovery STE): Target noise index: 66.5, Maximum mA limit 100<br>Philips (Brilliance 64): Reference mAs – 46 mAs (128 mA)<br>Siemens (effective mA): Sensation 64, Definition (DS/AS 64 slice)/(AS+ 128 slice/Flash 128 slice), Edge, Force – Reference mAs 35 mAs |
| Pitch                  | GE (Discovery 750HD, Discovery STE) – 0.984<br>Philips (Brilliance 64) – 0.923<br>Siemens – 1.0                                                                                                                                                                                |
| Rotation time          | 0.5 s                                                                                                                                                                                                                                                                          |
| <b>Reconstructions</b> |                                                                                                                                                                                                                                                                                |
| Non-iterative          | GE (750HD, Discovery STE): Standard, Bone<br>Philips (Brilliance 64): B, D (YB)                                                                                                                                                                                                |

|           |                                                                                                                                                                                                                                                                                                                                                                                                             |
|-----------|-------------------------------------------------------------------------------------------------------------------------------------------------------------------------------------------------------------------------------------------------------------------------------------------------------------------------------------------------------------------------------------------------------------|
|           | Siemens (Sensation 64, Definition DS/AS/AS+/Flash 64/128): B31f, B45f (B46f)<br>Siemens (Somatom Force): Bf40d, Qr44d<br>Siemens (Somatom Definition Edge): Bf37f, Bv45f                                                                                                                                                                                                                                    |
| Iterative | GE (750HD, Discovery STE): Standard ASIR 40%, Bone ASIR 40%, Standard ASIR 100%<br>Philips (Brilliance 64): B iDose L3, D (YB) iDose L3, B iDose L7<br>Siemens (Sensation 64, Definition DS/AS/AS+/Flash 64/128): I31f<br>SAFIRE 2, I44f SAFIRE 2, I31f SAFIRE 5<br>Siemens (Somatom Force): Bf40d ADMIRE 2, Qr44d ADMIRE 2, Bf40d ADMIRE 5<br>Siemens (Somatom Definition Edge): Bf37 f2, Br54 f2, Bf37 f5 |
| Thickness | GE (Discovery 750HD, Discovery STE) – 0.625<br>Philips (Brilliance 64) – 0.67<br>Siemens – 0.75 mm                                                                                                                                                                                                                                                                                                          |
| Interval  | 0.5 mm                                                                                                                                                                                                                                                                                                                                                                                                      |
| DFOV      | Lungs (no more than a 1 cm margin outside of the lungs on either side of the scan, where the lungs are the widest in the chest)                                                                                                                                                                                                                                                                             |
| HD mode   | GE (750HD, Discovery STE): OFF<br>Philips (Brilliance 64): n/a<br>Siemens (Sensation 64, Definition Edge/DS/AS/AS+/Flash 64/128, Somatom Force): n/a                                                                                                                                                                                                                                                        |

DFOV, display field of view; HD, high definition.

## References

1. Nishimura M, Makita H, Nagai K, *et al.* Annual change in pulmonary function and clinical phenotype in chronic obstructive pulmonary disease. *Am J Respir Crit Care Med* 2012;185(1):44-52. doi: 10.1164/rccm.2011106-0992OC
2. Bhatt SP, Bodduluri S, Hoffman EA, *et al.* Computed tomography measure of lung at risk and lung function decline in chronic obstructive pulmonary disease. *Am J Respir Crit Care Med* 2017;196(5):569-76.
3. Coxson HO, Dirksen A, Edwards LD, *et al.* The presence and progression of emphysema in COPD as determined by CT scanning and biomarker expression: a prospective analysis from the ECLIPSE study. *Lancet Respir Med* 2013;1(2):129-36.
4. Dirksen A, Piitulainen E, Parr D, *et al.* Exploring the role of CT densitometry: a randomised study of augmentation therapy in  $\alpha$ 1-antitrypsin deficiency. *Eur Respir J* 2009;33(6):1345-53.
